# Supplementary material for: Keys to mitigating rural depopulation. The case of Castilla-La Mancha (Spain)
Source: Research Square preprint supplement (doi:10.21203/rs.3.rs-6972099/v1), 2025-09-04
Supplement: Supplementary file 1 [file 9c4d762b0e10bec49db7a32f.xlsx]

## Sheet: Sheet 1
Id	Ayudapublica	lnayuda	ZEC	Tec	Municipio	POB_2022	lnpob	Propor_mujer	indiceM0-14	PEAM	Enveje_mujer	Mujeres	EDUCACION 1 (CEIP)	EDUCACION 2 (IESO)	SANIDAD	Ayuda_peso	Mujer<25	Mujer 25-44	Mujer>=45...17	indice<25	indice<25-44	Mujer>=45...20	INIC. INDEF.	INIC. TEMPORAL	indice_indef	indice_tempo	Grupo
02001	13513.2	9.51142	1	0	Abengibre	739	6.6053	0.508796	0.0338295	0.281461	0.193505	1	0	0	1	0.46924	4	5	10	0.142857	0.178571	0.357143	4	6	0.190476	0.285714	2
02002	0	0	0	0	Alatoz	496	6.20658	0.443548	0.0302419	0.221774	0.191532	0	0	0	1	0	4	8	15	0.102564	0.205128	0.384615	4	7	0.363636	0.636364	2
02003	0	0	0	0.863694	Albacete	172357	12.0573	0.511305	0.0709632	0.340439	0.0999031	1	1	0	1	0	439	2529	4046	0.039249	0.226106	0.361734	725	1446	0.173653	0.346347	7
02004	104428	11.5562	0	0	Albatana	670	6.50728	0.489552	0.0283582	0.28806	0.173134	0	0	0	0	0.539996	0	18	28	0	0.285714	0.444444	4	4	0.333333	0.333333	2
02005	120442	11.6989	1	0	Alborea	663	6.49677	0.490196	0.040724	0.298643	0.15083	0	0	0	1	0.236304	4	10	20	0.0689655	0.172414	0.344828	0	4	0	0.666667	2
02006	0	0	0	0	Alcadozo	634	6.45205	0.458991	0.044164	0.253943	0.160883	0	0	0	1	0	0	12	22	0	0.226415	0.415094	0	4	0	0.444444	1
02007	98742.8	11.5003	1	0.0127773	Alcalá del Júcar	1148	7.04578	0.458188	0.0374564	0.259582	0.16115	0	0	0	1	0.542847	0	12	33	0	0.139535	0.383721	4	7	0.210526	0.368421	2
02008	508865	13.1399	1	0	Alcaraz	1307	7.17549	0.478959	0.0558531	0.306044	0.117062	0	1	0	1	0.615595	6	24	49	0.0465116	0.186047	0.379845	4	15	0.0533333	0.2	1
02009	439808	12.9941	0	0.439375	Almansa	24224	10.0951	0.503633	0.0637797	0.329756	0.110097	1	1	0	1	0.215788	78	348	760	0.0439932	0.196277	0.428652	27	142	0.072	0.378667	5
02010	146126	11.8922	0	0	Alpera	2245	7.71646	0.478396	0.0726058	0.28196	0.123831	0	1	1	1	0.33374	4	41	71	0.025	0.25625	0.44375	5	5	0.131579	0.131579	2
02011	16650	9.72017	1	0	Ayna	582	6.36647	0.45189	0.0137457	0.21134	0.226804	0	0	0	1	0.201513	0	6	7	0	0.162162	0.189189	4	5	0.333333	0.416667	1
02012	95162.7	11.4633	0	0	Balazote	2388	7.77821	0.486181	0.0653266	0.329146	0.0917085	0	1	1	1	0.413424	5	39	60	0.0357143	0.278571	0.428571	13	6	0.295455	0.136364	1
02013	55408.8	10.9225	1	0	Balsa de Ves	126	4.83628	0.412698	0.0238095	0.238095	0.150794	0	0	0	1	0.433613	0	4	4	0	0.444444	0.444444	0	0	0	0	1
02014	15523.3	9.65009	0	0	Ballestero (El)	427	6.05678	0.480094	0.0398126	0.28103	0.159251	0	0	0	1	0.469302	0	4	9	0	0.210526	0.473684	0	4	0	0.8	1
02015	419369	12.9465	0	0	Barrax	1831	7.51262	0.484981	0.0611688	0.32059	0.103222	0	1	0	1	0.387062	12	35	80	0.0714286	0.208333	0.47619	4	4	0.117647	0.117647	4
02016	8526.87	9.05098	1	0	Bienservida	574	6.35263	0.456446	0.0261324	0.263066	0.167247	0	0	0	1	0.81	0	14	26	0	0.237288	0.440678	4	4	0.105263	0.105263	1
02017	34408.4	10.4461	1	0	Bogarra	756	6.62804	0.480159	0.0396825	0.195767	0.244709	0	0	0	1	0.742543	4	8	25	0.0645161	0.129032	0.403226	4	4	1	1	1
02018	377234	12.8406	0	0	Bonete	1006	6.91374	0.471173	0.0467197	0.298211	0.126243	0	1	0	0	0.52968	4	23	39	0.0416667	0.239583	0.40625	4	4	0.2	0.2	2
02019	42773.4	10.6637	1	0	Bonillo (El)	2698	7.90027	0.492958	0.0455893	0.309859	0.137509	0	1	0	1	0.561168	8	36	110	0.040404	0.181818	0.555556	5	20	0.138889	0.555556	1
02020	0	0	0	0	Carcelén	483	6.18002	0.47619	0.0434783	0.229814	0.202899	0	0	0	1	0	0	9	11	0	0.321429	0.392857	0	7	0	0.636364	2
02021	55345.5	10.9214	1	0.00590592	Casas de Juan Núñez	1356	7.21229	0.460914	0.0626844	0.294248	0.103982	0	1	0	1	0.545201	4	32	37	0.0350877	0.280702	0.324561	4	4	0.4	0.4	2
02022	140973	11.8563	1	0	Casas de Lázaro	321	5.77144	0.448598	0.00934579	0.255452	0.183801	0	0	0	1	0.85	0	4	6	0	0.210526	0.315789	4	0	1	0	1
02023	68104.9	11.1288	1	0	Casas de Ves	561	6.32972	0.472371	0.030303	0.254902	0.187166	0	0	0	0	0.498629	4	7	11	0.133333	0.233333	0.366667	4	0	0.8	0	1
02024	207327	12.2421	1	0	Casas-Ibáñez	4547	8.42222	0.496151	0.061799	0.325709	0.108643	0	1	0	1	0.202737	6	63	115	0.0216606	0.227437	0.415162	9	18	0.123288	0.246575	4
02025	131794	11.789	0	0.00324716	Caudete	10135	9.22375	0.490183	0.072521	0.31406	0.103601	0	1	0	1	0.190898	38	198	317	0.0460606	0.24	0.384242	19	70	0.118012	0.434783	5
02026	67245.5	11.1161	0	0	Cenizate	1183	7.07581	0.499577	0.0735418	0.312764	0.113271	0	0	0	0	0.297371	4	11	39	0.0519481	0.142857	0.506494	4	4	0.25	0.25	2
02027	81733.3	11.3112	1	0	Corral-Rubio	300	5.70378	0.466667	0.03	0.28	0.156667	0	0	0	0	0.717229	0	4	10	0	0.2	0.5	0	0	0	0	2
02028	0	0	1	0	Cotillas	129	4.85981	0.44186	0.0155039	0.286822	0.139535	0	0	0	1	0	0	4	4	0	0.266667	0.266667	0	0	0	0	1
02029	312971	12.6539	1	0.0059684	Chinchilla de Monte-Aragón	4497	8.41117	0.479431	0.0736046	0.325106	0.0807205	0	1	1	1	0.372533	4	65	104	0.0144928	0.235507	0.376812	8	27	0.0701754	0.236842	6
02030	786304	13.5751	1	0	Elche de la Sierra	3553	8.17555	0.509429	0.0579792	0.326203	0.125246	1	1	0	1	0.478918	11	82	148	0.0305556	0.227778	0.411111	4	31	0.0481928	0.373494	1
02031	14524.4	9.58358	1	0	Férez	614	6.41999	0.495114	0.0439739	0.312704	0.138436	0	1	0	1	0.893551	4	17	36	0.0555556	0.236111	0.5	4	4	0.571429	0.571429	1
02032	77184.4	11.254	0	0	Fuensanta	281	5.63835	0.451957	0.0142349	0.252669	0.185053	0	0	0	0	0.681619	4	5	12	0.137931	0.172414	0.413793	0	4	0	0.266667	4
02033	374716	12.8339	0	0	Fuente-Álamo	2461	7.80832	0.477448	0.0658269	0.299065	0.112556	0	1	0	1	0.360963	7	41	105	0.0339806	0.199029	0.509709	10	11	0.0877193	0.0964912	2
02034	617735	13.3338	1	0	Fuentealbilla	1821	7.50714	0.484898	0.0538166	0.314662	0.11642	0	1	0	1	0.405635	4	25	48	0.0373832	0.233645	0.448598	9	7	0.290323	0.225806	2
02035	416508	12.9397	0	0	Gineta (La)	2568	7.85088	0.478972	0.0864486	0.305685	0.086838	0	1	0	1	0.673423	7	59	54	0.0406977	0.343023	0.313953	4	9	0.181818	0.409091	6
02036	0	0	0	0	Golosalvo	98	4.58497	0.469388	0.0102041	0.214286	0.244898	0	0	0	0	0	0	0	5	0	0	0.555556	0	0	0	0	2
02037	758522	13.5391	1	0.771725	Hellín	30492	10.3252	0.497475	0.0682146	0.335563	0.0936967	0	1	0	1	0.577417	99	590	1031	0.040081	0.238866	0.417409	114	187	0.145408	0.23852	4
02038	200000	12.2061	0	0	Herrera (La)	304	5.71703	0.467105	0.0394737	0.286184	0.141447	0	0	0	1	0.609637	0	8	13	0	0.296296	0.481481	0	0	0	0	1
02039	156293	11.9595	1	0	Higueruela	1125	7.02554	0.48	0.0426667	0.289778	0.147556	0	0	0	1	0.340507	4	7	24	0.0816327	0.142857	0.489796	5	14	0.0980392	0.27451	2
02040	126197	11.7456	0	0.00115243	Hoya-Gonzalo	561	6.32972	0.458111	0.0356506	0.278075	0.144385	0	0	0	1	0.655822	4	7	18	0.108108	0.189189	0.486486	0	4	0	0.285714	2
02041	56250	10.9376	1	0	Jorquera	350	5.85793	0.445714	0.0257143	0.234286	0.185714	0	0	0	1	0.261628	0	0	11	0	0	0.44	4	0	1	0	2
02042	213762	12.2726	1	0	Letur	901	6.80351	0.506104	0.0310766	0.319645	0.155383	1	1	0	1	0.592239	4	11	46	0.036036	0.0990991	0.414414	4	4	0.266667	0.266667	1
02043	95628.1	11.4682	0	0	Lezuza	1300	7.17012	0.480769	0.0330769	0.291538	0.156154	0	0	0	1	1.09763	4	15	46	0.0412371	0.154639	0.474227	4	11	0.222222	0.611111	1
02044	35546.3	10.4786	0	0	Liétor	1096	6.99942	0.481752	0.024635	0.288321	0.168796	0	1	0	1	0.865215	4	19	77	0.0298507	0.141791	0.574627	0	10	0	0.588235	1
02045	0	0	0	0	Madrigueras	4644	8.44333	0.487726	0.0680448	0.300172	0.119509	0	1	0	1	0	8	74	134	0.0246914	0.228395	0.41358	7	16	0.0598291	0.136752	4
02046	112882	11.6341	0	0	Mahora	1430	7.26543	0.484615	0.065035	0.301399	0.118182	0	1	0	1	0.248917	5	26	40	0.047619	0.247619	0.380952	0	9	0	0.243243	2
02047	45661.3	10.729	1	0	Masegoso	114	4.7362	0.421053	0.00877193	0.192982	0.219298	0	0	0	0	0.781336	0	0	4	0	0	0.571429	0	0	0	0	1
02048	37364.7	10.5285	0	0.984764	Minaya	1442	7.27379	0.488211	0.0520111	0.282247	0.153953	0	1	0	1	0.274572	4	13	34	0.0465116	0.151163	0.395349	4	0	0.235294	0	4
02049	153773	11.9432	1	0	Molinicos	837	6.72982	0.48626	0.0274791	0.252091	0.206691	0	1	0	1	0.398961	0	11	33	0	0.146667	0.44	4	13	0.166667	0.541667	1
02050	416181	12.9389	0	0	Montalvos	88	4.47734	0.420455	0.0340909	0.215909	0.170455	0	0	0	0	0.681046	0	0	0	0	0	0	0	0	0	0	4
02051	349132	12.7632	0	0	Montealegre del Castillo	2056	7.62852	0.481518	0.0607977	0.286965	0.133755	0	1	0	1	0.279533	8	40	55	0.0601504	0.300752	0.413534	24	14	0.109091	0.0636364	2
02052	0	0	0	0	Motilleja	660	6.49224	0.454545	0.0621212	0.281818	0.110606	0	0	0	1	0	4	6	13	0.105263	0.157895	0.342105	4	4	0.5	0.5	2
02053	426424	12.9632	0	0	Munera	3422	8.13798	0.488311	0.0517241	0.306838	0.129749	0	1	1	1	0.423412	4	50	105	0.0190476	0.238095	0.5	0	13	0	0.282609	1
02054	21865.2	9.99265	0	0	Navas de Jorquera	528	6.2691	0.471591	0.0587121	0.261364	0.151515	0	0	0	1	0.545634	0	5	18	0	0.147059	0.529412	4	4	0.181818	0.181818	2
02055	381169	12.851	1	0	Nerpio	1180	7.07327	0.442373	0.0432203	0.255932	0.14322	0	0	0	1	0.489294	8	14	32	0.0740741	0.12963	0.296296	0	4	0	0.666667	1
02056	124922	11.7354	0	0	Ontur	1934	7.56735	0.495863	0.0542916	0.288004	0.153568	0	1	0	1	0.259039	7	35	53	0.05	0.25	0.378571	4	8	0.1	0.2	2
02057	328662	12.7028	1	0.0138578	Ossa de Montiel	2215	7.70301	0.493002	0.0487585	0.303386	0.140858	0	1	1	1	0.445448	4	27	83	0.021978	0.148352	0.456044	4	4	0.307692	0.307692	1
02058	93647.1	11.4473	1	0	Paterna del Madera	329	5.79606	0.43465	0.0243161	0.240122	0.170213	0	0	0	0	0.758756	0	6	11	0	0.222222	0.407407	0	0	0	0	1
02059	24287.1	10.0977	1	0	Peñascosa	323	5.77765	0.430341	0.0278638	0.256966	0.145511	0	0	0	1	0.8	4	5	13	0.129032	0.16129	0.419355	0	0	0	0	1
02060	379505	12.8466	0	0	Peñas de San Pedro	1433	7.26753	0.412421	0.0279135	0.26448	0.120028	0	0	0	1	0.358315	4	15	37	0.0470588	0.176471	0.435294	4	4	0.444444	0.444444	1
02061	132831	11.7968	1	0	Pétrola	663	6.49677	0.473605	0.0361991	0.257919	0.179487	0	0	0	1	0.571921	4	9	15	0.0952381	0.214286	0.357143	0	4	0	0.266667	2
02062	0	0	1	0	Povedilla	388	5.96101	0.440722	0.0335052	0.242268	0.164948	0	0	0	1	0	4	4	19	0.097561	0.097561	0.463415	4	0	1	0	1
02063	39040	10.5723	0	0	Pozohondo	1569	7.35819	0.476737	0.0446144	0.275972	0.15615	0	0	0	1	0.394343	5	33	44	0.0416667	0.275	0.366667	4	0	1	0	1
02064	23958	10.0841	0	0	Pozo-Lorente	391	5.96871	0.473146	0.0127877	0.268542	0.191816	0	0	0	1	0.6	0	7	14	0	0.2	0.4	4	4	1	1	2
02065	95875.7	11.4708	0	0.000414233	Pozuelo	461	6.1334	0.45987	0.021692	0.299349	0.138829	0	0	0	1	0.788032	4	0	18	0.129032	0	0.580645	0	0	0	0	1
02066	0	0	1	0	Recueja (La)	221	5.39816	0.438914	0.00904977	0.248869	0.180995	0	0	0	1	0	4	0	4	0.4	0	0.4	4	0	1	0	2
02067	68891.4	11.1403	1	0	Riópar	1318	7.18387	0.486343	0.0531108	0.306525	0.126707	0	0	0	1	0.395763	4	19	27	0.0412371	0.195876	0.278351	4	23	0.102564	0.589744	1
02068	9945.48	9.20487	1	0	Robledo	385	5.95324	0.457143	0.0493506	0.301299	0.106494	0	0	0	1	0.77	4	6	13	0.121212	0.181818	0.393939	0	4	0	0.666667	1
02069	353237	12.7749	0	0.706091	Roda (La)	15497	9.6484	0.495386	0.073369	0.321675	0.100342	0	1	0	1	0.262584	50	298	437	0.0456204	0.271898	0.398723	33	60	0.124528	0.226415	4
02070	20140.7	9.9105	1	0	Salobre	438	6.08222	0.484018	0.0456621	0.26484	0.173516	0	0	0	1	0.36847	4	5	6	0.148148	0.185185	0.222222	4	4	0.210526	0.210526	1
02071	88488.2	11.3906	0	0	San Pedro	1142	7.04054	0.483363	0.0464098	0.315236	0.121716	0	0	0	1	0.802122	4	12	30	0.0533333	0.16	0.4	4	10	0.190476	0.47619	1
02072	167679	12.0298	1	0	Socovos	1743	7.46336	0.481354	0.0424555	0.293746	0.145152	0	1	1	1	0.40805	4	32	75	0.0239521	0.191617	0.449102	4	7	0.25	0.4375	1
02073	144560	11.8814	0	0.00030476	Tarazona de la Mancha	6183	8.72956	0.484393	0.0637231	0.307132	0.113537	0	1	0	1	0.457208	16	100	219	0.0334029	0.208768	0.457203	6	16	0.0967742	0.258065	4
02074	528265	13.1774	1	0.310939	Tobarra	7758	8.95648	0.483114	0.0662542	0.305749	0.111111	0	1	0	1	0.512597	18	138	194	0.0358566	0.2749	0.386454	26	40	0.159509	0.245399	4
02075	56250	10.9376	1	0.936875	Valdeganga	1919	7.55956	0.490881	0.0557582	0.291819	0.143304	0	0	0	1	0.184011	4	31	39	0.036036	0.279279	0.351351	9	4	0.3	0.133333	2
02076	18104	9.80389	1	0	Vianos	313	5.7462	0.482428	0.0351438	0.284345	0.162939	0	0	0	1	0.271023	0	4	15	0	0.137931	0.517241	0	4	0	1	1
02077	11862.7	9.38115	1	0	Villa de Ves	60	4.09434	0.433333		0.3	0.133333	0	0	0	0	0.883758	0	4	4	0	0.444444	0.444444	0	0	0	0	1
02078	72387.7	11.1898	0	0	Villalgordo del Júcar	1072	6.97728	0.471082	0.0401119	0.279851	0.151119	0	1	0	1	0.396435	0	12	19	0	0.206897	0.327586	4	4	0.444444	0.444444	4
02079	225057	12.3241	1	0	Villamalea	4000	8.29405	0.48825	0.0595	0.31775	0.111	0	1	1	1	0.30195	8	47	114	0.0310078	0.182171	0.44186	14	46	0.10687	0.351145	4
02080	31266.4	10.3503	1	0	Villapalacios	555	6.31897	0.481081	0.036036	0.275676	0.169369	0	0	0	1	0.752018	0	6	15	0	0.181818	0.454545	0	0	0	0	1
02081	350991	12.7685	1	0.518202	Villarrobledo	24886	10.1221	0.505786	0.0721289	0.332114	0.101543	1	1	0	1	0.479969	68	456	600	0.0400235	0.268393	0.353149	58	149	0.118852	0.305328	4
02082	0	0	1	0	Villatoya	106	4.66344	0.433962	0.0377358	0.264151	0.132075	0	0	0	1	0	0	4	4	0	0.666667	0.666667	4	0	1	0	1
02083	5248.25	8.56565	0	0	Villavaliente	202	5.30827	0.386139	0.0049505	0.183168	0.19802	0	0	0	1	0.168873	0	4	5	0	0.333333	0.416667	4	0	0.5	0	2
02084	0	0	1	0	Villaverde de Guadalimar	321	5.77144	0.439252	0.0373832	0.246106	0.155763	0	0	0	1	0	4	8	14	0.105263	0.210526	0.368421	4	4	0.4	0.4	1
02085	18534.7	9.8274	0	0	Viveros	335	5.81413	0.480597	0.0328358	0.277612	0.170149	0	0	0	1	0.336995	0	4	9	0	0.235294	0.529412	0	0	0	0	1
02086	346239	12.7549	1	0	Yeste	2495	7.82204	0.479359	0.0316633	0.255711	0.191984	0	0	0	1	0.437953	8	42	82	0.0329218	0.17284	0.337449	4	12	0.181818	0.545455	1
02901	137186	11.8291	0	0	Pozo Cañada	2763	7.92407	0.493304	0.0694897	0.307999	0.115816	0	1	1	0	0.349974	6	43	82	0.0327869	0.234973	0.448087	4	6	0.307692	0.461538	6
13001	120444	11.6989	1	0	Abenójar	1314	7.18083	0.482496	0.042618	0.285388	0.15449	0	1	0	1	5.57651	10	29	56	0.0735294	0.213235	0.411765	0	4	0	0.210526	1
13002	120444	11.6989	1	0	Agudo	1615	7.38709	0.497833	0.0588235	0.26935	0.169659	0	1	0	1	0.692351	5	31	44	0.037037	0.22963	0.325926	5	12	0.192308	0.461538	1
13003	126872	11.7509	0	0.000217608	Alamillo	464	6.13988	0.476293	0.0237069	0.243534	0.209052	0	0	0	1	0.788482	4	8	12	0.1	0.2	0.3	0	4	0	1	1
13004	0	0	0	0	Albaladejo	1074	6.97915	0.484171	0.0316574	0.272812	0.179702	0	0	0	1	0	4	17	51	0.036036	0.153153	0.459459	9	5	0.0882353	0.0490196	2
13005	215499	12.2807	1	0.636332	Alcázar de San Juan	30516	10.326	0.513632	0.0721589	0.336184	0.105289	1	1	0	1	0.522028	73	487	806	0.0335787	0.224011	0.370745	66	114	0.148984	0.257336	5
13006	0	0	1	0	Alcoba	535	6.28227	0.48972	0.0168224	0.302804	0.170093	0	1	0	1	0	0	8	12	0	0.258065	0.387097	0	8	0	0.888889	1
13007	31500.6	10.3578	1	0.000569948	Alcolea de Calatrava	1370	7.22257	0.494161	0.0445255	0.30365	0.145985	0	1	0	1	0.836058	4	22	29	0.0384615	0.211538	0.278846	4	4	1	1	1
13008	0	0	0	0	Alcubillas	452	6.11368	0.511062	0.0265487	0.292035	0.192478	1	1	0	1	0	4	6	21	0.129032	0.193548	0.677419	4	4	0.16	0.16	2
13009	40875.8	10.6183	1	0	Aldea del Rey	1580	7.36518	0.496203	0.0398734	0.290506	0.165823	0	1	0	1	0.576236	0	41	48	0	0.372727	0.436364	5	4	0.121951	0.097561	2
13010	70000	11.1563	1	0.00185092	Alhambra	983	6.89061	0.488301	0.0366226	0.307223	0.144456	0	1	0	0	0.215392	4	22	55	0.0392157	0.215686	0.539216	4	96	0.0179372	0.430493	2
13011	566134	13.2466	1	0.728643	Almadén	5069	8.5309	0.517854	0.0501085	0.308739	0.159006	1	1	0	1	0.349961	18	130	185	0.0306122	0.221088	0.314626	11	32	0.11828	0.344086	1
13012	163514	12.0047	1	0	Almadenejos	391	5.96871	0.488491	0.0409207	0.265985	0.181586	0	0	0	1	0.766788	0	9	10	0	0.290323	0.322581	0	4	0	0.5	1
13013	1.0563e+06	13.8703	1	0.19491	Almagro	8907	9.09459	0.50668	0.0669137	0.332435	0.107331	1	1	0	1	0.432921	22	188	213	0.034375	0.29375	0.332813	12	46	0.0816327	0.312925	4
13014	263143	12.4805	0	0	Almedina	489	6.19236	0.466258	0.0184049	0.271984	0.175869	0	0	0	0	0.454729	4	8	16	0.129032	0.258065	0.516129	5	4	0.0833333	0.0666667	2
13015	687058	13.4402	1	0.405172	Almodóvar del Campo	5873	8.67812	0.497191	0.0432488	0.285033	0.168909	0	1	0	1	0.410213	8	81	134	0.0223464	0.226257	0.374302	4	34	0.0268456	0.228188	1
13016	21926.5	9.99545	1	0	Almuradiel	740	6.60665	0.497297	0.0567568	0.295946	0.144595	0	1	0	1	0.612599	0	13	19	0	0.254902	0.372549	4	10	0.137931	0.344828	2
13017	16240.3	9.69525	1	0.0562668	Anchuras	265	5.57973	0.471698	0.0301887	0.233962	0.207547	0	0	0	1	0.9	0	4	4	0	0.307692	0.307692	0	11	0	0.6875	1
13018	70000	11.1563	0	0	Arenas de San Juan	1031	6.93828	0.483996	0.0669253	0.29195	0.125121	0	0	0	0	0.710451	4	27	33	0.039604	0.267327	0.326733	5	4	0.208333	0.166667	4
13019	282150	12.5502	1	0.861858	Argamasilla de Alba	6846	8.83142	0.497079	0.0644172	0.331142	0.101519	0	1	0	1	0.282277	24	136	250	0.0409556	0.232082	0.426621	18	43	0.101124	0.241573	4
13020	409864	12.9236	0	0.598484	Argamasilla de Calatrava	5849	8.67403	0.501453	0.0743717	0.305522	0.121559	1	1	0	1	0.325599	18	121	156	0.0390456	0.262473	0.338395	6	24	0.09375	0.375	2
13021	0	0	1	0	Arroba de los Montes	402	5.99645	0.455224	0.0223881	0.246269	0.186567	0	0	0	1	0	4	4	17	0.129032	0.129032	0.548387	0	4	0	0.444444	1
13022	141568	11.8605	0	0.000693903	Ballesteros de Calatrava	367	5.90536	0.504087	0.0299728	0.27248	0.201635	1	1	0	1	0.647633	4	12	9	0.0952381	0.285714	0.214286	4	4	0.571429	0.571429	2
13023	127479	11.7557	0	0.0760686	Bolaños de Calatrava	11910	9.38513	0.484719	0.068262	0.318808	0.097649	0	1	0	1	0.280658	30	225	320	0.0394218	0.295664	0.420499	74	37	0.239482	0.119741	4
13024	11106.8	9.31531	1	0.951266	Brazatortas	1005	6.91274	0.474627	0.038806	0.271642	0.164179	0	1	0	1	0.296734	4	19	28	0.0615385	0.292308	0.430769	4	13	0.173913	0.565217	1
13025	0	0	1	0	Cabezarados	300	5.70378	0.453333	0.0333333	0.263333	0.156667	0	1	0	1	0	4	5	18	0.114286	0.142857	0.514286	0	4	0	0.2	1
13026	0	0	1	0	Cabezarrubias del Puerto	484	6.18208	0.471074	0.0371901	0.221074	0.21281	0	0	0	1	0	0	5	8	0	0.185185	0.296296	0	6	0	0.857143	1
13027	11804	9.3762	1	0	Calzada de Calatrava	3704	8.21717	0.49703	0.049946	0.298056	0.149028	0	1	0	1	0.257364	17	88	140	0.0481586	0.249292	0.396601	12	9	0.153846	0.115385	2
13028	330165	12.7073	1	0	Campo de Criptana	13142	9.48357	0.498706	0.0658956	0.316999	0.115812	0	1	0	1	0.452306	42	217	332	0.0482204	0.249139	0.381171	16	73	0.0747664	0.341121	5
13029	0	0	0	0	Cañada de Calatrava	104	4.64439	0.432692	0.0288462	0.221154	0.182692	0	0	0	1	0	4	0	4	1	0	1	0	4	0	1	2
13030	0	0	1	0.00246305	Caracuel de Calatrava	125	4.82831	0.408	0.016	0.24	0.152	0	0	0	0	0	0	5	4	0	0.416667	0.333333	0	0	0	0	2
13031	200000	12.2061	0	0.000368429	Carrión de Calatrava	3131	8.04911	0.49505	0.077611	0.322581	0.0948579	0	1	0	1	0.7	4	56	89	0.015873	0.222222	0.353175	5	9	0.166667	0.3	6
13032	0	0	0	0	Carrizosa	1154	7.05099	0.498267	0.0294627	0.304159	0.164645	0	1	0	1	0	6	22	68	0.0451128	0.165414	0.511278	4	4	0.0930233	0.0930233	2
13033	122991	11.7199	1	0.996775	Castellar de Santiago	1819	7.50604	0.493128	0.0494777	0.305113	0.138538	0	1	0	1	0.236877	4	35	60	0.0330579	0.289256	0.495868	54	6	0.186207	0.0206897	2
13034	0	0	1	0.988838	Ciudad Real	74850	11.2232	0.526279	0.069499	0.346212	0.110568	1	1	0	1	0	208	1382	1645	0.0394837	0.262339	0.312263	253	648	0.14804	0.379169	7
13035	0	0	1	7.73387e-05	Corral de Calatrava	1089	6.99302	0.508724	0.0550964	0.303949	0.149679	1	0	0	1	0	0	24	34	0	0.282353	0.4	0	4	0	0.307692	2
13036	104895	11.5607	1	0	Cortijos (Los)	865	6.76273	0.465896	0.0520231	0.255491	0.158382	0	1	0	1	0.411096	5	11	21	0.078125	0.171875	0.328125	6	4	0.352941	0.235294	1
13037	33363.7	10.4152	0	0	Cózar	913	6.81674	0.492881	0.0405257	0.280394	0.171961	0	1	0	1	0.321581	4	12	37	0.0533333	0.16	0.493333	23	6	0.156463	0.0408163	2
13038	517160	13.1561	1	0.000251723	Chillón	1758	7.47193	0.519909	0.0574516	0.28157	0.180887	1	1	0	1	0.387659	5	32	42	0.0390625	0.25	0.328125	4	19	0.137931	0.655172	1
13039	172248	12.0567	1	0.269241	Daimiel	17680	9.78019	0.497851	0.0635181	0.319174	0.115158	0	1	0	1	0.297326	52	350	686	0.0305703	0.205761	0.403292	22	117	0.0558376	0.296954	4
13040	15074.5	9.62076	1	0	Fernán Caballero	977	6.88449	0.496418	0.04913	0.28045	0.166837	0	1	0	1	0.893705	9	10	28	0.116883	0.12987	0.363636	4	16	0.0655738	0.262295	1
13041	22894.4	10.0386	1	0	Fontanarejo	246	5.50533	0.418699	0.0162602	0.219512	0.182927	0	0	0	0	0.892976	0	4	10	0	0.181818	0.454545	0	4	0	1	1
13042	128391	11.7628	1	0	Fuencaliente	1012	6.91968	0.482213	0.0583004	0.277668	0.146245	0	1	1	1	0.889403	4	22	35	0.0430108	0.236559	0.376344	4	4	0.125	0.125	1
13043	127318	11.7544	0	0	Fuenllana	214	5.36598	0.471963	0.0046729	0.224299	0.242991	0	0	0	0	0.899856	0	5	4	0	0.454545	0.363636	0	4	0	0.142857	2
13044	39865.8	10.5933	0	0	Fuente el Fresno	3085	8.03431	0.486224	0.0512156	0.299838	0.13517	0	1	0	1	0.445446	12	74	138	0.04	0.246667	0.46	11	12	0.15493	0.169014	1
13045	11225.9	9.32598	0	0	Granátula de Calatrava	716	6.57368	0.51257	0.0502793	0.303073	0.159218	1	1	0	1	0.26437	4	20	38	0.05	0.25	0.475	4	4	0.148148	0.148148	2
13046	11555.8	9.35494	1	0	Guadalmez	718	6.57647	0.513928	0.0320334	0.281337	0.200557	1	0	0	0	0.357805	5	17	26	0.0704225	0.239437	0.366197	4	4	0.4	0.4	1
13047	387716	12.868	1	0	Herencia	8432	9.03979	0.491461	0.0719877	0.325783	0.0936907	0	1	0	1	0.361406	33	230	245	0.0447761	0.312076	0.332429	20	27	0.122699	0.165644	5
13048	84807.6	11.3481	1	0	Hinojosas de Calatrava	505	6.22456	0.477228	0.0356436	0.221782	0.219802	0	0	0	0	0.9	0	10	13	0	0.25	0.325	4	4	0.363636	0.363636	1
13049	8562.04	9.05509	1	0	Horcajo de los Montes	821	6.71052	0.485993	0.0535932	0.285018	0.147381	0	0	0	1	0.900001	4	7	34	0.0526316	0.0921053	0.447368	4	4	0.5	0.5	1
13050	0	0	0	0	Labores (Las)	557	6.32257	0.486535	0.0341113	0.285458	0.166966	0	0	0	1	0	4	6	21	0.0851064	0.12766	0.446809	4	4	0.125	0.125	4
13051	19575.2	9.88202	1	0.00404284	Luciana	368	5.90808	0.456522	0.013587	0.23913	0.203804	0	1	0	1	0.73087	4	10	12	0.105263	0.263158	0.315789	0	4	0	0.571429	1
13052	215386	12.2802	1	0	Malagón	7801	8.96201	0.505448	0.0717857	0.312524	0.121138	1	1	0	1	0.418904	28	166	252	0.0414201	0.245562	0.372781	47	29	0.191837	0.118367	1
13053	84035.5	11.339	0	0.0779167	Manzanares	17738	9.78346	0.504623	0.0681024	0.319314	0.117206	1	1	0	1	0.421208	54	326	431	0.0431655	0.260592	0.344524	23	68	0.0931174	0.275304	4
13054	103951	11.5517	0	0.675482	Membrilla	5904	8.68339	0.5	0.0684282	0.313855	0.117717	0	1	0	1	0.276897	9	66	73	0.0409091	0.3	0.331818	47	12	0.315436	0.0805369	4
13055	0	0	1	0	Mestanza	644	6.4677	0.473602	0.0186335	0.236025	0.218944	0	0	0	1	0	4	17	23	0.0634921	0.269841	0.365079	0	0	0	0	1
13056	2994.38	8.00449	1	0.997511	Miguelturra	15744	9.66421	0.497523	0.084159	0.348006	0.0653582	0	1	0	1	0.0920602	49	314	374	0.0413153	0.264755	0.315346	6	42	0.0508475	0.355932	6
13057	160445	11.9857	1	0.000171363	Montiel	1233	7.11721	0.476886	0.0437956	0.302514	0.130576	0	1	0	1	0.365202	5	10	70	0.0409836	0.0819672	0.57377	4	27	0.0597015	0.402985	2
13058	105236	11.564	1	0.00551355	Moral de Calatrava	5178	8.55217	0.492661	0.0641174	0.314793	0.11375	0	1	0	1	0.626003	15	105	137	0.0446429	0.3125	0.407738	61	44	0.193651	0.139683	2
13059	0	0	1	0	Navalpino	203	5.31321	0.46798	0.0394089	0.26601	0.162562	0	0	0	0	0	0	4	6	0	0.235294	0.352941	4	4	0.235294	0.235294	1
13060	22819.8	10.0354	1	0	Navas de Estena	292	5.67675	0.458904	0.0308219	0.232877	0.195205	0	0	0	1	0.899966	0	4	6	0	0.285714	0.428571	4	4	1	1	1
13061	953336	13.7677	1	0	Pedro Muñoz	7480	8.91999	0.494652	0.0680481	0.318717	0.107888	0	1	0	1	0.438729	23	175	210	0.0363924	0.276899	0.332278	25	6	0.208333	0.05	5
13062	12673.5	9.44727	1	0	Picón	667	6.50279	0.478261	0.047976	0.332834	0.0974513	0	1	0	1	0.887624	4	13	21	0.0666667	0.216667	0.35	4	4	0.4	0.4	1
13063	263755	12.4828	1	0.900304	Piedrabuena	4363	8.38092	0.49278	0.0616548	0.307587	0.123539	0	1	0	1	0.408264	19	132	145	0.0427928	0.297297	0.326577	5	25	0.0537634	0.268817	1
13064	184013	12.1228	0	0	Poblete	2802	7.93809	0.484654	0.113133	0.321556	0.0499643	0	1	0	1	0.418029	10	56	57	0.0529101	0.296296	0.301587	5	17	0.102041	0.346939	6
13065	697436	13.4552	1	0.766582	Porzuna	3505	8.16195	0.482739	0.0510699	0.297004	0.134665	0	1	0	1	0.385642	26	97	103	0.0734463	0.274011	0.29096	13	11	0.254902	0.215686	1
13066	0	0	1	0.989277	Pozuelo de Calatrava	3629	8.19671	0.488564	0.0810141	0.327638	0.0799118	0	1	0	1	0	20	94	118	0.0611621	0.287462	0.360856	4	13	0.08	0.26	6
13067	24282.5	10.0975	1	0	Pozuelos de Calatrava (Los)	352	5.86363	0.463068	0.0198864	0.267045	0.176136	0	1	0	1	0.896062	0	4	12	0	0.153846	0.461538	4	0	0.266667	0	2
13068	28097.5	10.2434	1	0	Puebla de Don Rodrigo	1119	7.02019	0.447721	0.0446828	0.279714	0.123324	0	1	0	1	0.798906	4	30	31	0.0444444	0.333333	0.344444	4	14	0.0449438	0.157303	1
13069	0	0	0	0	Puebla del Príncipe	671	6.50877	0.469449	0.0357675	0.251863	0.181818	0	1	0	1	0	5	8	25	0.0833333	0.133333	0.416667	4	4	0.166667	0.166667	2
13070	0	0	1	0	Puerto Lápice	896	6.79794	0.50558	0.0625	0.28683	0.15625	1	0	0	1	0	0	15	36	0	0.223881	0.537313	4	6	0.056338	0.084507	4
13071	0	0	1	0.400537	Puertollano	45539	10.7263	0.518039	0.0668218	0.320473	0.130745	1	1	0	1	0	207	1153	1455	0.0476081	0.265179	0.334637	54	164	0.0824427	0.250382	7
13072	0	0	1	0	Retuerta del Bullaque	911	6.81454	0.451153	0.0526894	0.263447	0.135016	0	0	0	1	0	4	22	19	0.0555556	0.305556	0.263889	0	6	0	0.5	1
13073	114505	11.6484	1	0	Saceruela	526	6.2653	0.475285	0.0380228	0.271863	0.165399	0	1	0	1	0.654426	4	6	26	0.0701754	0.105263	0.45614	0	4	0	1	1
13074	70000	11.1563	0	0	San Carlos del Valle	1099	7.00216	0.484076	0.0646042	0.291174	0.128298	0	1	0	1	0.425634	0	17	26	0	0.303571	0.464286	4	14	0.057971	0.202899	2
13075	21466.2	9.97424	1	0	San Lorenzo de Calatrava	206	5.32788	0.441748	0.0194175	0.23301	0.18932	0	0	0	0	0.556619	0	4	6	0	0.333333	0.5	0	4	0	0.8	1
13076	35174	10.4681	0	0	Santa Cruz de los Cáñamos	513	6.24028	0.516569	0.0565302	0.276803	0.183236	1	0	0	0	0.285821	4	11	31	0.0677966	0.186441	0.525424	11	4	0.134146	0.0487805	2
13077	225982	12.3282	0	0.034119	Santa Cruz de Mudela	3950	8.28147	0.502278	0.0526582	0.31443	0.13519	1	1	0	1	0.250785	11	67	111	0.037931	0.231034	0.382759	8	75	0.0380952	0.357143	2
13078	201404	12.2131	1	0.230079	Socuéllamos	12098	9.4008	0.496694	0.0710861	0.316581	0.109026	0	1	0	1	0.420794	29	204	289	0.036478	0.256604	0.363522	40	51	0.176211	0.22467	4
13079	107344	11.5838	0	0.999362	Solana (La)	15313	9.63646	0.491086	0.0666101	0.324365	0.100111	0	1	0	1	0.285267	48	334	533	0.0388664	0.270445	0.431579	41	47	0.156489	0.179389	4
13080	6721.38	8.81305	1	0	Solana del Pino	328	5.79301	0.478659	0.0121951	0.240854	0.22561	0	0	0	1	0.259745	4	6	16	0.121212	0.181818	0.484848	0	4	0	1	1
13081	193576	12.1734	0	0	Terrinches	622	6.43294	0.472669	0.0353698	0.29582	0.141479	0	1	0	1	0.885463	4	8	27	0.0727273	0.145455	0.490909	6	4	0.0779221	0.0519481	2
13082	0	0	0	0.573325	Tomelloso	36024	10.4919	0.501693	0.0743948	0.330113	0.0971852	1	1	0	1	0	151	889	1229	0.0467203	0.275062	0.38026	129	110	0.155609	0.13269	4
13083	29463.1	10.2909	0	0	Torralba de Calatrava	3052	8.02355	0.503277	0.0714286	0.307012	0.124836	1	1	0	1	0.845476	9	54	79	0.0418605	0.251163	0.367442	4	14	0.097561	0.341463	6
13084	50413.6	10.828	1	0.00572338	Torre de Juan Abad	1003	6.91075	0.505484	0.0548355	0.28016	0.170489	1	1	0	1	0.8603	4	17	16	0.0701754	0.298246	0.280702	6	12	0.0666667	0.133333	2
13085	200699	12.2096	0	0.000164042	Torrenueva	2659	7.88571	0.493042	0.0661903	0.301241	0.125611	0	1	0	1	0.325311	10	62	75	0.0490196	0.303922	0.367647	5	16	0.025	0.08	2
13086	42876.9	10.6661	1	0	Valdemanco del Esteras	164	5.09987	0.469512	0.00609756	0.207317	0.256098	0	0	0	1	0.820585	4	4	7	0.190476	0.190476	0.333333	0	0	0	0	1
13087	0	0	0	0.314908	Valdepeñas	30071	10.3113	0.511822	0.069735	0.337934	0.104154	1	1	0	1	0	92	612	914	0.0402979	0.268068	0.40035	55	134	0.0921273	0.224456	4
13088	0	0	0	0	Valenzuela de Calatrava	661	6.49375	0.532526	0.0620272	0.355522	0.114977	1	1	0	1	0	5	13	38	0.0757576	0.19697	0.575758	0	0	0	0	2
13089	0	0	1	0.670584	Villahermosa	1772	7.47986	0.506208	0.037246	0.277652	0.191309	1	1	0	1	0	4	19	48	0.0363636	0.172727	0.436364	4	5	0.16	0.2	2
13090	74273.1	11.2155	1	0	Villamanrique	1083	6.98749	0.513389	0.0341644	0.306556	0.172669	1	1	0	1	0.86605	4	23	57	0.0350877	0.201754	0.5	4	18	0.0416667	0.1875	2
13091	192984	12.1704	0	0.0294178	Villamayor de Calatrava	607	6.40853	0.510708	0.0444811	0.288303	0.177924	1	1	0	1	0.280582	4	8	17	0.0851064	0.170213	0.361702	0	0	0	0	2
13092	0	0	1	0	Villanueva de la Fuente	1965	7.58325	0.486005	0.0366412	0.289059	0.160305	0	1	1	1	0	4	37	100	0.0186916	0.172897	0.46729	4	8	0.153846	0.307692	2
13093	243813	12.4042	0	0.561646	Villanueva de los Infantes	4828	8.48219	0.503521	0.0501243	0.315659	0.137738	1	1	0	1	0.243107	9	56	143	0.0275229	0.171254	0.437309	9	27	0.0612245	0.183673	2
13094	15807.2	9.66822	1	0	Villanueva de San Carlos	278	5.62762	0.478417	0.00359712	0.226619	0.248201	0	0	0	1	0.363636	0	4	8	0	0.363636	0.727273	0	5	0	0.833333	2
13095	0	0	0	0	Villar del Pozo	54	3.98898	0.407407	0	0.203704	0.203704	0	0	0	0	0	0	0	0	0	0	0	0	0	0	0	2
13096	60360.3	11.0081	1	0	Villarrubia de los Ojos	9667	9.17647	0.500362	0.0654805	0.323678	0.111203	1	1	0	1	0.283166	22	232	340	0.0256112	0.270081	0.395809	11	51	0.0474138	0.219828	4
13097	65131.9	11.0842	0	0	Villarta de San Juan	2713	7.90581	0.496867	0.0582381	0.308883	0.129746	0	1	0	1	0.70227	7	53	85	0.0334928	0.253589	0.406699	5	23	0.0892857	0.410714	4
13098	80971.4	11.3019	1	0	Viso del Marqués	2183	7.68846	0.513514	0.04306	0.2918	0.178653	1	1	0	1	0.821482	5	34	68	0.0314465	0.213836	0.427673	5	10	0.0520833	0.104167	2
13901	91358	11.4225	1	0	Robledo (El)	1061	6.96697	0.473139	0.0527804	0.291235	0.129123	0	0	0	1	0.351198	4	28	25	0.0425532	0.297872	0.265957	4	6	0.25	0.375	1
13902	0	0	1	0.973357	Ruidera	555	6.31897	0.515315	0.0720721	0.324324	0.118919	1	1	0	0	0	4	12	27	0.0689655	0.206897	0.465517	4	4	0.5	0.5	2
13903	226472	12.3304	0	0	Arenales de San Gregorio	571	6.34739	0.485114	0.0490368	0.28021	0.155867	0	1	0	1	0.462903	0	12	11	0	0.4	0.366667	0	4	0	1	5
13904	0	0	0	0	Llanos del Caudillo	693	6.54103	0.502165	0.0634921	0.316017	0.122655	1	1	0	0	0	0	10	12	0	0.294118	0.352941	0	0	0	0	4
16001	13370.5	9.50081	0	0	Abia de la Obispalía	60	4.09434	0.383333	0	0.233333	0.15	0	0	0	1	0.86	0	4	0	0	1	0	0	4	0	0.4	1
16002	14077.5	9.55233	0	0	Acebrón (El)	231	5.44242	0.52381	0.0519481	0.307359	0.164502	1	0	0	0	0.854301	0	4	7	0	0.222222	0.388889	0	4	0	1	2
16003	7015	8.85581	0	0	Alarcón	152	5.02388	0.546053	0.0197368	0.368421	0.157895	1	0	0	1	0.323517	4	4	4	0.444444	0.444444	0.444444	4	4	1	1	2
16004	15018.7	9.61705	1	1	Albaladejo del Cuende	230	5.43808	0.469565	0.0304348	0.169565	0.269565	0	0	0	1	0.697312	0	4	4	0	0.8	0.8	4	0	1	0	1
16005	14116.9	9.55513	1	0	Albalate de las Nogueras	259	5.55683	0.482625	0.027027	0.262548	0.19305	0	0	0	0	0.770398	0	4	7	0	0.285714	0.5	0	4	0	1	1
16006	21204.7	9.96198	1	0.00133307	Albendea	122	4.80402	0.532787	0.0163934	0.245902	0.270492	1	0	0	0	0.331609	0	4	0	0	1	0	0	4	0	1	1
16007	33831.7	10.4292	0	0	Alberca de Záncara (La)	1585	7.36834	0.495268	0.0630915	0.305994	0.126183	0	0	0	1	0.34	4	12	10	0.1	0.3	0.25	4	5	0.363636	0.454545	2
16008	0	0	1	0	Alcalá de la Vega	79	4.36945	0.43038	0	0.227848	0.202532	0	0	0	1	0	0	0	4	0	0	1	0	4	0	1	1
16009	0	0	1	0	Alcantud	51	3.93183	0.431373	0	0.196078	0.235294	0	0	0	1	0	0	0	4	0	0	1	0	0	0	0	1
16010	121147	11.7048	1	0	Alcázar del Rey	134	4.89784	0.455224	0.0298507	0.223881	0.201493	0	0	0	1	0.381507	0	4	4	0	0.5	0.5	0	4	0	1	2
16011	8901.43	9.09397	0	0	Alcohujate	26	3.2581	0.538462	0.0384615	0.307692	0.192308	1	0	0	0	0.873	0	0	0	0	0	0	0	0	0	0	1
16012	0	0	0	0	Alconchel de la Estrella	77	4.34381	0.415584	0.012987	0.246753	0.155844	0	0	0	1	0	0	4	4	0	1	1	0	0	0	0	1
16013	39060	10.5729	1	0	Algarra	22	3.09104	0.454545	0	0.363636	0.0909091	0	0	0	0	0.811945	0	0	4	0	0	1	0	0	0	0	1
16014	164993	12.0137	1	0	Aliaguilla	634	6.45205	0.479495	0.0473186	0.263407	0.16877	0	0	0	1	0.424679	0	4	10	0	0.148148	0.37037	0	0	0	0	1
16015	26746.2	10.1941	0	0	Almarcha (La)	425	6.05209	0.451765	0.0352941	0.258824	0.157647	0	0	0	1	0.459	0	4	9	0	0.190476	0.428571	0	4	0	1	1
16016	15730	9.66332	0	0	Almendros	234	5.45532	0.452991	0.025641	0.247863	0.179487	0	0	0	0	0.86	0	4	0	0	0.571429	0	0	4	0	1	2
16017	0	0	0	0	Almodóvar del Pinar	386	5.95584	0.476684	0.0362694	0.292746	0.147668	0	0	0	1	0	0	5	8	0	0.25	0.4	0	4	0	1	1
16018	56920	10.9494	0	0	Almonacid del Marquesado	424	6.04973	0.488208	0.0306604	0.283019	0.174528	0	0	0	0	0.272673	0	4	6	0	0.285714	0.428571	4	4	0.5	0.5	2
16019	40537.1	10.61	0	0	Altarejos	205	5.32301	0.473171	0.0243902	0.22439	0.22439	0	0	0	1	0.364918	0	0	0	0	0	0	4	4	0.8	0.8	1
16020	0	0	0	0	Arandilla del Arroyo	9	2.19722	0.333333	0	0.111111	0.222222	0	0	0	0	0	0	0	0	0	0	0	4	4	1	1	1
16022	32993.5	10.4041	1	0	Arcos de la Sierra	73	4.29046	0.39726	0.0273973	0.150685	0.219178	0	0	0	1	0.681537	0	0	4	0	0	1	0	0	0	0	1
16023	35195.8	10.4687	0	0.0878525	Chillarón de Cuenca	721	6.58064	0.471567	0.0721221	0.31068	0.0887656	0	0	0	1	0.407575	4	9	14	0.08	0.18	0.28	4	6	0.444444	0.666667	1
16024	0	0	1	0	Arguisuelas	133	4.89035	0.511278	0.0601504	0.293233	0.157895	1	0	0	0	0	0	5	4	0	0.555556	0.444444	0	4	0	1	1
16025	0	0	0	0	Arrancacepas	18	2.89037	0.444444	0	0.166667	0.277778	0	0	0	0	0	0	0	0	0	0	0	0	0	0	0	1
16026	0	0	0	0	Atalaya del Cañavate	110	4.70048	0.472727	0.0272727	0.263636	0.181818	0	0	0	1	0	0	0	5	0	0	0.454545	0	0	0	0	1
16027	102759	11.5401	1	0	Barajas de Melo	987	6.89467	0.465046	0.0547112	0.288754	0.121581	0	0	0	1	0.859402	0	15	24	0	0.267857	0.428571	4	4	0.235294	0.235294	2
16029	30840.7	10.3366	0	0	Barchín del Hoyo	97	4.57471	0.329897	0	0.154639	0.175258	0	0	0	1	0.822074	0	0	4	0	0	0.444444	0	0	0	0	2
16030	0	0	0	0	Bascuñana de San Pedro	24	3.17805	0.166667	0	0.125	0.0416667	0	0	0	0	0	0	0	0	0	0	0	0	0	0	0	1
16031	4980.71	8.51333	1	0	Beamud	41	3.71357	0.463415	0.0243902	0.195122	0.243902	0	0	0	0	0.7977	0	0	4	0	0	1	0	0	0	0	1
16032	0	0	0	0	Belinchón	383	5.94803	0.490862	0.0574413	0.24282	0.190601	0	0	0	1	0	0	5	6	0	0.217391	0.26087	4	4	0.057971	0.057971	2
16033	57430.1	10.9583	0	0.998323	Belmonte	1782	7.48549	0.503928	0.0375982	0.295174	0.171156	1	1	0	1	0.336901	4	19	55	0.036036	0.171171	0.495495	6	4	0.461538	0.307692	2
16034	17505.3	9.77026	1	0	Belmontejo	141	4.94876	0.41844	0	0.234043	0.184397	0	0	0	1	0.86	0	0	0	0	0	0	0	0	0	0	1
16035	24210.3	10.0945	1	0	Beteta	229	5.43372	0.502183	0.0174672	0.310044	0.174672	1	1	0	1	0.80898	0	4	4	0	0.571429	0.571429	0	9	0	0.321429	1
16036	39944.7	10.5953	1	0	Boniches	141	4.94876	0.510638	0.0992908	0.212766	0.198582	1	0	0	0	0.200536	0	0	4	0	0	0.571429	0	0	0	0	1
16038	88953.8	11.3959	0	0	Buciegas	36	3.58352	0.305556	0	0.222222	0.0833333	0	0	0	1	0.481174	0	0	4	0	0	0.8	0	0	0	0	1
16039	21332.4	9.96798	0	0	Buenache de Alarcón	447	6.10256	0.467562	0.033557	0.266219	0.167785	0	0	0	1	0.259981	0	5	15	0	0.16129	0.483871	0	4	0	0.5	1
16040	0	0	1	0	Buenache de la Sierra	106	4.66344	0.433962	0.0377358	0.301887	0.0943396	0	0	0	0	0	0	0	0	0	0	0	0	0	0	0	1
16041	113656	11.6409	1	0.00019772	Buendía	415	6.02828	0.455422	0.0337349	0.253012	0.168675	0	0	0	0	0.587616	4	4	9	0.190476	0.190476	0.428571	4	4	0.5	0.5	1
16042	49084.1	10.8013	0	0	Campillo de Altobuey	1262	7.14045	0.49683	0.0554675	0.304279	0.137084	0	0	0	1	0.365421	0	7	28	0	0.111111	0.444444	5	7	0.208333	0.291667	1
16043	0	0	1	0.00712112	Campillos-Paravientos	103	4.63473	0.417476	0.0485437	0.203883	0.165049	0	0	0	0	0	0	4	4	0	0.8	0.8	0	0	0	0	1
16044	0	0	1	0	Campillos-Sierra	29	3.3673	0.482759	0	0.241379	0.241379	0	0	0	1	0	0	0	4	0	0	1	0	0	0	0	1
16045	15672.4	9.65966	0	0	Canalejas del Arroyo	168	5.12396	0.434524	0	0.160714	0.27381	0	0	0	1	0.287831	4	4	5	0.333333	0.333333	0.416667	0	0	0	0	1
16046	8019	8.98957	1	0	Cañada del Hoyo	231	5.44242	0.467532	0.017316	0.225108	0.225108	0	0	0	1	0.278851	4	4	4	0.333333	0.333333	0.333333	4	4	1	1	1
16047	0	0	0	0	Cañada Juncosa	231	5.44242	0.454545	0.012987	0.264069	0.177489	0	0	0	0	0	0	4	4	0	1	1	0	0	0	0	1
16048	0	0	1	0	Cañamares	445	6.09807	0.449438	0.0494382	0.262921	0.137079	0	0	0	0	0	0	4	19	0	0.117647	0.558824	4	4	0.307692	0.307692	1
16049	17715.2	9.78218	0	0	Cañavate (El)	136	4.91265	0.551471	0.00735294	0.301471	0.242647	1	0	0	0	0.54552	0	0	4	0	0	1	0	0	0	0	1
16050	0	0	0	0	Cañaveras	244	5.49717	0.504098	0.0491803	0.258197	0.196721	1	0	0	1	0	4	6	4	0.222222	0.333333	0.222222	0	0	0	0	1
16051	0	0	0	0	Cañaveruelas	129	4.85981	0.488372	0.00775194	0.271318	0.209302	0	0	0	0	0	0	0	4	0	0	0.666667	0	0	0	0	1
16052	35101.5	10.466	1	0	Cañete	792	6.67456	0.481061	0.0580808	0.304293	0.118687	0	0	1	1	0.805731	4	10	14	0.0833333	0.208333	0.291667	6	4	0.285714	0.190476	1
16053	0	0	1	0	Cañizares	429	6.06146	0.454545	0.018648	0.270396	0.165501	0	0	0	1	0	4	4	7	0.235294	0.235294	0.411765	4	0	1	0	1
16055	69119.4	11.1436	1	0	Carboneras de Guadazaón	794	6.67708	0.481108	0.0415617	0.270781	0.168766	0	0	1	1	0.338949	4	4	12	0.148148	0.148148	0.444444	4	14	0.181818	0.636364	1
16056	70669.7	11.1658	1	0	Cardenete	474	6.16121	0.472574	0.0253165	0.255274	0.191983	0	0	0	0	0.807894	0	6	8	0	0.206897	0.275862	0	4	0	1	1
16057	53065.5	10.8793	1	0	Carrascosa	68	4.21951	0.367647	0.0147059	0.161765	0.191176	0	0	0	0	0.8602	0	0	0	0	0	0	4	0	1	0	1
16058	0	0	0	0	Carrascosa de Haro	98	4.58497	0.510204	0.0102041	0.265306	0.234694	1	0	0	0	0	0	4	4	0	0.8	0.8	0	0	0	0	2
16060	86670.6	11.3699	0	0	Casas de Benítez	816	6.70441	0.507353	0.0551471	0.284314	0.167892	1	0	0	1	0.279398	0	7	13	0	0.21875	0.40625	0	5	0	0.416667	2
16061	75691.3	11.2344	0	8.30323e-05	Casas de Fernando Alonso	1144	7.04229	0.479895	0.0533217	0.270979	0.155594	0	0	0	1	0.352542	0	8	19	0	0.186047	0.44186	10	4	0.37037	0.148148	2
16062	0	0	1	0	Casas de Garcimolina	31	3.43399	0.387097	0.0322581	0.225806	0.129032	0	0	0	0	0	0	4	0	0	1	0	0	0	0	0	1
16063	9407.32	9.14924	0	0	Casas de Guijarro	108	4.68213	0.472222	0.0277778	0.25	0.194444	0	0	0	0	0.262264	0	0	4	0	0	0.8	0	0	0	0	2
16064	0	0	0	0	Casas de Haro	844	6.73815	0.470379	0.0485782	0.283175	0.138626	0	0	0	1	0	4	5	16	0.102564	0.128205	0.410256	4	5	0.363636	0.454545	2
16065	0	0	0	0.0448741	Casas de los Pinos	415	6.02828	0.513253	0.0433735	0.257831	0.212048	1	0	0	1	0	0	4	4	0	0.333333	0.333333	4	4	0.142857	0.142857	2
16066	422182	12.9532	0	0	Casasimarro	3140	8.05198	0.478025	0.0640127	0.300637	0.113376	0	1	1	1	0.390233	9	31	64	0.0542169	0.186747	0.385542	7	10	0.142857	0.204082	2
16067	0	0	0	0	Castejón	124	4.82028	0.419355	0.0241935	0.225806	0.169355	0	0	0	0	0	4	4	5	0.363636	0.363636	0.454545	0	4	0	1	1
16068	0	0	0	0	Castillejo de Iniesta	115	4.74493	0.46087	0.0173913	0.278261	0.165217	0	0	0	0	0	0	4	4	0	0.666667	0.666667	0	4	0	0.307692	2
16070	4308.73	8.3684	1	0	Castillejo-Sierra	28	3.3322	0.5	0	0.321429	0.178571	0	0	0	0	0.7977	0	0	4	0	0	1	0	0	0	0	1
16071	0	0	0	0	Castillo-Albaráñez	22	3.09104	0.545455	0.136364	0.181818	0.227273	1	0	0	0	0	0	0	0	0	0	0	0	0	0	0	1
16072	200000	12.2061	0	0	Castillo de Garcimuñoz	128	4.85203	0.390625	0.0078125	0.15625	0.226562	0	0	0	1	0.535709	0	4	4	0	0.4	0.4	0	0	0	0	1
16073	14216.2	9.56214	0	0	Cervera del Llano	217	5.3799	0.497696	0.0414747	0.271889	0.184332	0	0	0	0	0.833792	0	4	5	0	0.266667	0.333333	0	0	0	0	1
16074	0	0	1	0	Cierva (La)	37	3.61092	0.432432	0	0.135135	0.297297	0	0	0	0	0	0	0	0	0	0	0	4	0	1	0	1
16078	52725.6	10.8729	1	0.989108	Cuenca	53389	10.8854	0.526607	0.0654255	0.347075	0.114106	1	1	0	1	0.499992	123	607	867	0.0431276	0.212833	0.303997	201	437	0.18223	0.396192	7
16079	67594.6	11.1213	1	0	Cueva del Hierro	35	3.55535	0.371429	0.0285714	0.228571	0.114286	0	0	0	0	0.826811	0	0	0	0	0	0	0	0	0	0	1
16081	0	0	0	0	Chumillas	58	4.06044	0.413793	0.0517241	0.258621	0.103448	0	0	0	1	0	0	4	4	0	1	1	0	0	0	0	1
16082	17267	9.75655	1	0	Enguídanos	299	5.70044	0.464883	0.0501672	0.247492	0.167224	0	0	0	1	0.552721	4	4	6	0.117647	0.117647	0.176471	4	0	1	0	1
16083	0	0	1	0	Fresneda de Altarejos	35	3.55535	0.457143	0	0.285714	0.171429	0	0	0	0	0	0	0	0	0	0	0	0	0	0	0	1
16084	0	0	1	0	Fresneda de la Sierra	46	3.82864	0.413043	0	0.130435	0.282609	0	0	0	1	0	0	0	0	0	0	0	0	0	0	0	1
16085	0	0	1	0	Frontera (La)	144	4.96981	0.465278	0.0208333	0.256944	0.1875	0	0	0	0	0	0	4	4	0	0.5	0.5	0	0	0	0	1
16086	0	0	0	0	Fuente de Pedro Naharro	1211	7.0992	0.479769	0.0528489	0.317093	0.109827	0	0	0	0	0	4	11	28	0.0689655	0.189655	0.482759	4	4	0.235294	0.235294	2
16087	108623	11.5956	0	0	Fuentelespino de Haro	235	5.45959	0.480851	0.0340426	0.195745	0.251064	0	0	0	1	0.31944	0	0	4	0	0	1	0	4	0	1	2
16088	27967.2	10.2388	0	1	Fuentelespino de Moya	103	4.63473	0.475728	0.0485437	0.242718	0.184466	0	0	0	0	0.8602	0	4	4	0	1	1	0	4	0	1	1
16089	114855	11.6514	0	0.775486	Fuentes	467	6.14633	0.486081	0.0513919	0.295503	0.139186	0	0	0	1	0.708856	0	5	7	0	0.25	0.35	0	4	0	0.210526	1
16091	15425.1	9.64375	1	0	Fuertescusa	69	4.23411	0.463768	0	0.15942	0.304348	0	0	0	0	0.860395	0	0	0	0	0	0	0	0	0	0	1
16092	0	0	0	0	Gabaldón	151	5.01728	0.390728	0.0198675	0.225166	0.145695	0	0	0	1	0	0	4	0	0	0.444444	0	0	0	0	0	2
16093	28227.3	10.248	1	0	Garaballa	58	4.06044	0.482759	0	0.258621	0.224138	0	0	0	0	0.877007	4	4	4	0.8	0.8	0.8	0	0	0	0	1
16094	40503.7	10.6091	1	0	Gascueña	142	4.95583	0.408451	0.028169	0.204225	0.176056	0	0	0	0	0.835848	0	4	4	0	0.5	0.5	0	0	0	0	1
16095	145895	11.8906	0	0	Graja de Campalbo	96	4.56435	0.4375	0.0208333	0.270833	0.145833	0	0	0	0	0.835212	0	0	4	0	0	1	0	0	0	0	1
16096	2844.47	7.95313	0	0	Graja de Iniesta	362	5.89164	0.472376	0.0497238	0.328729	0.0939227	0	0	0	1	0.900001	0	4	8	0	0.266667	0.533333	4	4	0.4	0.4	2
16097	0	0	0	0	Henarejos	129	4.85981	0.48062	0	0.193798	0.286822	0	0	0	0	0	0	4	0	0	1	0	0	0	0	0	1
16098	50009.7	10.82	1	0	Herrumblar (El)	733	6.59715	0.495225	0.0627558	0.306958	0.125512	0	0	0	1	0.314266	4	10	9	0.114286	0.285714	0.257143	4	4	0.571429	0.571429	2
16099	0	0	0	0	Hinojosa (La)	191	5.25227	0.502618	0.0314136	0.272251	0.198953	1	0	0	1	0	0	4	4	0	0.5	0.5	4	0	1	0	1
16100	116606	11.6666	0	0	Hinojosos (Los)	759	6.632	0.494071	0.0434783	0.288538	0.162055	0	0	0	1	0.418081	4	5	20	0.102564	0.128205	0.512821	0	4	0	0.571429	2
16101	0	0	1	0	Hito (El)	151	5.01728	0.476821	0.0397351	0.205298	0.231788	0	0	0	1	0	0	4	5	0	0.444444	0.555556	0	4	0	1	2
16102	0	0	0	0.57158	Honrubia	1530	7.33302	0.502614	0.051634	0.316993	0.133987	1	0	0	1	0	4	15	22	0.0634921	0.238095	0.349206	4	4	0.222222	0.222222	1
16103	0	0	0	0	Hontanaya	256	5.54518	0.449219	0.0117188	0.195312	0.242188	0	0	0	0	0	0	0	4	0	0	0.666667	4	4	1	1	2
16104	0	0	1	0.370991	Hontecillas	62	4.12713	0.5	0.0645161	0.209677	0.225806	0	0	0	1	0	0	4	0	0	1	0	0	0	0	0	1
16106	103211	11.5445	0	0.99823	Horcajo de Santiago	3572	8.18088	0.487122	0.0615901	0.299552	0.12598	0	1	0	1	0.26173	11	61	104	0.0434783	0.241107	0.411067	4	10	0.166667	0.416667	2
16107	11851.9	9.38024	1	0	Huélamo	73	4.29046	0.452055	0	0.191781	0.260274	0	0	0	1	0.721108	0	0	0	0	0	0	0	0	0	0	1
16108	67648.2	11.1221	1	0	Huelves	72	4.27667	0.472222	0.0694444	0.208333	0.194444	0	0	0	0	0.82508	4	4	4	0.571429	0.571429	0.571429	0	0	0	0	2
16109	10530.2	9.262	0	0	Huérguina	50	3.91202	0.46	0.02	0.2	0.24	0	0	0	0	0.823568	0	0	0	0	0	0	0	0	0	0	1
16110	12591.3	9.44076	0	0	Huerta de la Obispalía	116	4.75359	0.396552	0.0258621	0.232759	0.137931	0	0	0	1	0.86	0	4	4	0	0.8	0.8	0	0	0	0	1
16111	0	0	1	0	Huerta del Marquesado	170	5.1358	0.452941	0.0411765	0.288235	0.123529	0	0	0	0	0	0	4	4	0	0.285714	0.285714	0	4	0	0.4	1
16112	85196.1	11.3527	0	0	Huete	1716	7.44775	0.484848	0.048951	0.297786	0.138112	0	0	1	1	0.0373529	5	39	37	0.0342466	0.267123	0.253425	0	4	0	0.114286	1
16113	164950	12.0134	1	0	Iniesta	4340	8.37563	0.504608	0.0677419	0.337327	0.0995392	1	1	0	1	0.399269	5	32	66	0.0304878	0.195122	0.402439	11	15	0.11	0.15	2
16115	0	0	1	0	Laguna del Marquesado	56	4.02535	0.428571	0.0714286	0.232143	0.125	0	0	0	0	0	0	4	4	0	1	1	0	0	0	0	1
16116	0	0	1	0	Lagunaseca	55	4.00733	0.418182	0.0181818	0.145455	0.254545	0	0	0	0	0	0	0	4	0	0	1	0	0	0	0	1
16117	7172.8	8.87805	0	0	Landete	1217	7.10414	0.484799	0.0435497	0.285127	0.156122	0	0	0	1	0.32	4	13	29	0.0615385	0.2	0.446154	4	5	0.571429	0.714286	1
16118	96747.8	11.4799	0	0	Ledaña	1563	7.35436	0.504798	0.0556622	0.28023	0.168906	1	1	0	1	0.325429	0	4	41	0	0.0408163	0.418367	5	6	0.142857	0.171429	2
16119	0	0	0	0.972068	Leganiel	221	5.39816	0.466063	0.0452489	0.266968	0.153846	0	0	0	0	0	0	7	5	0	0.388889	0.277778	0	0	0	0	2
16121	3420.89	8.13766	1	0	Majadas (Las)	233	5.45104	0.480687	0.0128755	0.309013	0.158798	0	0	0	1	0.7091	0	4	7	0	0.5	0.875	0	0	0	0	1
16122	204427	12.228	0	0.727273	Mariana	312	5.743	0.474359	0.0705128	0.275641	0.128205	0	0	0	0	0.638019	0	4	7	0	0.2	0.35	4	0	1	0	1
16123	32547.7	10.3905	1	0	Masegosa	62	4.12713	0.419355	0	0.258065	0.16129	0	0	0	0	0.8602	0	0	0	0	0	0	0	0	0	0	1
16124	123451	11.7236	1	0.00296477	Mesas (Las)	2296	7.73892	0.48824	0.0496516	0.304878	0.133711	0	1	1	1	0.351593	4	36	58	0.0296296	0.266667	0.42963	14	8	0.285714	0.163265	2
16125	52712.9	10.8726	1	0	Minglanilla	2268	7.72665	0.488095	0.0705467	0.312169	0.105379	0	1	1	1	0.364046	0	28	66	0	0.181818	0.428571	15	10	0.357143	0.238095	2
16126	33571.8	10.4214	1	0	Mira	924	6.82871	0.493506	0.0573593	0.299784	0.136364	0	0	0	1	0.269924	0	10	32	0	0.125	0.4	0	4	0	0.8	1
16128	0	0	0	0	Monreal del Llano	50	3.91202	0.42	0	0.22	0.2	0	0	0	0	0	0	0	0	0	0	0	0	0	0	0	2
16129	14641	9.59158	0	0	Montalbanejo	93	4.5326	0.505376	0	0.268817	0.236559	1	0	0	0	0.86	0	4	4	0	1	1	4	0	1	0	1
16130	37522	10.5327	1	0	Montalbo	691	6.53814	0.487699	0.0738061	0.279305	0.134588	0	0	0	1	0.457287	4	7	14	0.102564	0.179487	0.358974	4	7	0.2	0.35	2
16131	0	0	1	0	Monteagudo de las Salinas	120	4.78749	0.391667	0.00833333	0.225	0.158333	0	0	0	0	0	0	0	4	0	0	1	0	0	0	0	1
16132	0	0	1	0	Mota de Altarejos	34	3.52636	0.382353	0	0.176471	0.205882	0	0	0	1	0	0	0	4	0	0	1	0	0	0	0	1
16133	130821	11.7816	1	0.994521	Mota del Cuervo	6069	8.71095	0.50206	0.0698632	0.322129	0.110068	1	1	0	1	0.324311	9	84	103	0.0310345	0.289655	0.355172	10	48	0.1	0.48	2
16134	468777	13.0579	0	0.96317	Motilla del Palancar	6026	8.70384	0.502489	0.0738467	0.339695	0.0889479	1	1	0	1	0.280731	8	78	107	0.025641	0.25	0.342949	12	95	0.0517241	0.409483	2
16135	0	0	1	0	Moya	128	4.85203	0.40625	0.015625	0.171875	0.21875	0	0	0	1	0	0	4	4	0	0.5	0.5	0	0	0	0	1
16137	0	0	1	0	Narboneta	41	3.71357	0.414634	0.0487805	0.195122	0.170732	0	0	0	0	0	0	0	4	0	0	1	0	0	0	0	1
16139	0	0	0	0	Olivares de Júcar	294	5.68358	0.47619	0.0170068	0.20068	0.258503	0	0	0	0	0	0	4	4	0	0.333333	0.333333	0	0	0	0	1
16140	89652.6	11.4037	0	0	Olmeda de la Cuesta	21	3.04452	0.380952	0	0.190476	0.190476	0	0	0	1	0.856865	0	0	0	0	0	0	0	0	0	0	1
16141	12495.1	9.43309	0	0	Olmeda del Rey	134	4.89784	0.5	0.00746269	0.253731	0.238806	0	0	0	1	0.832966	0	4	4	0	0.8	0.8	4	0	1	0	1
16142	0	0	0	0	Olmedilla de Alarcón	136	4.91265	0.426471	0.0147059	0.25	0.161765	0	0	0	0	0	0	4	4	0	0.444444	0.444444	4	0	1	0	2
16143	0	0	0	0	Olmedilla de Eliz	17	2.83321	0.176471	0	0.0588235	0.117647	0	0	0	0	0	0	0	0	0	0	0	0	0	0	0	1
16145	22811.8	10.035	0	0	Osa de la Vega	447	6.10256	0.483221	0.0246085	0.290828	0.167785	0	0	0	1	0.654947	0	8	21	0	0.2	0.525	0	4	0	1	2
16146	0	0	1	0	Pajarón	77	4.34381	0.532468	0	0.233766	0.298701	1	0	0	1	0	0	0	0	0	0	0	0	0	0	0	1
16147	0	0	1	0	Pajaroncillo	63	4.14313	0.349206	0.015873	0.190476	0.142857	0	0	0	0	0	0	4	4	0	0.666667	0.666667	0	0	0	0	1
16148	16649.6	9.72014	0	0	Palomares del Campo	560	6.32794	0.496429	0.0214286	0.285714	0.189286	0	0	0	1	0.847807	0	4	8	0	0.235294	0.470588	0	4	0	0.444444	1
16149	0	0	1	0	Palomera	169	5.1299	0.52071	0.0473373	0.289941	0.183432	1	0	0	1	0	0	4	0	0	0.666667	0	0	0	0	0	1
16150	0	0	1	0	Paracuellos	96	4.56435	0.489583	0.0208333	0.270833	0.197917	0	0	0	1	0	0	0	4	0	0	1	0	4	0	1	1
16151	0	0	0	0	Paredes	55	4.00733	0.418182	0.0181818	0.2	0.2	0	0	0	1	0	0	0	4	0	0	1	0	0	0	0	2
16152	0	0	1	0	Parra de las Vegas (La)	33	3.49651	0.272727	0.030303	0.0909091	0.151515	0	0	0	0	0	0	0	0	0	0	0	0	4	0	1	1
16153	6486.48	8.77748	0	0.881638	Pedernoso (El)	1125	7.02554	0.497778	0.0524444	0.306667	0.138667	0	1	0	1	0.33	4	8	21	0.08	0.16	0.42	4	8	0.117647	0.235294	2
16154	855659	13.6596	1	0.00515258	Pedroñeras (Las)	6583	8.79225	0.485797	0.0642564	0.312775	0.108765	0	1	0	1	0.610582	8	63	84	0.0311284	0.245136	0.326848	76	29	0.279412	0.106618	2
16155	46749.5	10.7526	0	0	Peral (El)	650	6.47697	0.424615	0.0461538	0.26	0.118462	0	0	0	0	0.329269	4	7	5	0.129032	0.225806	0.16129	0	4	0	0.444444	2
16156	5216.18	8.55952	1	0	Peraleja (La)	97	4.57471	0.371134	0	0.175258	0.195876	0	0	0	1	0.360744	0	0	0	0	0	0	0	0	0	0	1
16157	22606.9	10.026	1	0	Pesquera (La)	212	5.35659	0.462264	0.0377358	0.221698	0.20283	0	0	0	1	0.374864	0	5	4	0	0.333333	0.266667	0	0	0	0	2
16158	110834	11.6158	1	0	Picazo (El)	674	6.51323	0.488131	0.0548961	0.317507	0.115727	0	0	0	1	0.33807	0	7	18	0	0.170732	0.439024	0	4	0	1	2
16159	45710.8	10.7301	0	0	Pinarejo	189	5.24175	0.492063	0.026455	0.190476	0.275132	0	0	0	1	0.608827	0	4	4	0	0.571429	0.571429	0	0	0	0	1
16160	0	0	1	0	Pineda de Gigüela	62	4.12713	0.33871	0.0322581	0.112903	0.193548	0	0	0	0	0	0	0	0	0	0	0	0	0	0	0	1
16161	19003.4	9.85237	0	0	Piqueras del Castillo	46	3.82864	0.413043	0.0217391	0.108696	0.282609	0	0	0	0	0.859979	0	0	0	0	0	0	0	4	0	1	1
16162	0	0	1	0	Portalrubio de Guadamejud	31	3.43399	0.483871	0	0.193548	0.290323	0	0	0	0	0	0	4	4	0	1	1	0	0	0	0	1
16163	4427.34	8.39555	1	0	Portilla	58	4.06044	0.465517	0	0.172414	0.293103	0	0	0	0	0.709101	0	4	4	0	1	1	0	0	0	0	1
16165	4771.1	8.47033	1	0	Poyatos	58	4.06044	0.448276	0.0689655	0.189655	0.189655	0	0	0	1	0.883499	0	4	4	0	1	1	0	0	0	0	1
16166	65259.6	11.0861	0	0	Pozoamargo	279	5.63121	0.455197	0.0179211	0.261649	0.175627	0	0	0	0	0.304826	0	4	7	0	0.333333	0.583333	0	4	0	0.571429	2
16167	23007.6	10.0436	0	0	Pozorrubio	322	5.77455	0.521739	0.0310559	0.28882	0.201863	1	0	0	1	0.788786	4	4	10	0.181818	0.181818	0.454545	0	0	0	0	2
16169	0	0	1	0	Pozuelo (El)	43	3.7612	0.348837	0.0232558	0.255814	0.0697674	0	0	0	0	0	0	0	4	0	0	1	0	4	0	1	1
16170	0	0	1	0	Priego	885	6.78559	0.498305	0.0440678	0.310734	0.143503	0	0	0	1	0	4	11	19	0.0615385	0.169231	0.292308	0	4	0	0.8	1
16171	116305	11.664	0	0.0047158	Provencio (El)	2387	7.77779	0.500209	0.0674487	0.289066	0.143695	1	1	1	1	0.262954	5	31	33	0.0458716	0.284404	0.302752	4	4	0.222222	0.222222	2
16172	11970	9.39016	0	0	Puebla de Almenara	311	5.73979	0.459807	0.00321543	0.199357	0.257235	0	0	0	1	0.667062	0	0	6	0	0	0.545455	0	0	0	0	2
16173	117519	11.6744	1	0.181236	Valle de altomira, El	206	5.32788	0.461165	0.0339806	0.242718	0.184466	0	0	0	1	0.637921	0	4	4	0	0.571429	0.571429	0	0	0	0	1
16174	3605.25	8.19015	0	0	Puebla del Salvador	192	5.2575	0.463542	0.046875	0.223958	0.192708	0	0	0	0	0.2185	0	4	4	0	0.4	0.4	0	4	0	0.8	2
16175	298879	12.6078	0	0.837936	Quintanar del Rey	7632	8.94011	0.485849	0.0782233	0.320231	0.0873952	0	0	0	1	0.303204	20	141	202	0.0398406	0.280876	0.40239	35	25	0.2	0.142857	2
16176	0	0	0	0	Rada de Haro	49	3.89182	0.387755	0.0408163	0.204082	0.142857	0	0	0	1	0	0	0	4	0	0	1	0	0	0	0	2
16177	0	0	0	0	Reíllo	105	4.65396	0.466667	0.0380952	0.266667	0.161905	0	0	0	0	0	0	4	4	0	0.571429	0.571429	0	0	0	0	1
16181	14421.3	9.57646	0	0	Rozalén del Monte	58	4.06044	0.5	0.0517241	0.155172	0.293103	0	0	0	1	0.25874	4	0	4	0.666667	0	0.666667	4	0	1	0	2
16185	17639.4	9.77789	1	0.012987	Saceda-Trasierra	37	3.61092	0.351351	0	0.108108	0.243243	0	0	0	0	0.881968	0	0	4	0	0	1	0	0	0	0	2
16186	14435.7	9.57746	0	0	Saelices	450	6.10925	0.482222	0.0355556	0.277778	0.168889	0	0	0	1	0.86	0	5	4	0	0.263158	0.210526	4	4	0.285714	0.285714	2
16187	0	0	1	0	Salinas del Manzano	67	4.20469	0.41791	0.0149254	0.268657	0.134328	0	0	0	0	0	0	0	4	0	0	0.8	0	0	0	0	1
16188	35747.4	10.4842	0	0	Salmeroncillos	101	4.61512	0.415842	0.0693069	0.217822	0.128713	0	0	0	1	0.200457	0	0	0	0	0	0	0	0	0	0	1
16189	193121	12.1711	1	0	Salvacañete	291	5.67332	0.505155	0.0446735	0.295533	0.164948	1	0	0	0	0.684169	0	0	4	0	0	1	0	0	0	0	1
16190	86126.4	11.3636	0	0.541057	San Clemente	6827	8.82864	0.49773	0.0673795	0.315512	0.114838	0	1	0	1	0.295099	10	73	125	0.0319489	0.233227	0.399361	15	32	0.151515	0.323232	2
16191	84115.3	11.3399	1	0	San Lorenzo de la Parrilla	1066	6.97167	0.4803	0.0469043	0.270169	0.163227	0	0	0	1	0.368021	4	7	15	0.0833333	0.145833	0.3125	0	0	0	0	1
16192	0	0	0	0	San Martín de Boniches	46	3.82864	0.434783	0	0.195652	0.23913	0	0	0	1	0	0	0	0	0	0	0	0	0	0	0	1
16193	0	0	0	1	San Pedro Palmiches	49	3.89182	0.428571	0.0204082	0.0816327	0.326531	0	0	0	1	0	0	0	0	0	0	0	0	0	0	0	1
16194	34426.2	10.4466	1	0	Santa Cruz de Moya	230	5.43808	0.491304	0.026087	0.252174	0.213043	0	0	0	0	0.285452	0	4	9	0	0.235294	0.529412	0	0	0	0	1
16195	63355	11.0565	0	0	Santa María del Campo Rus	522	6.25767	0.48659	0.0363985	0.252874	0.197318	0	0	0	1	0.477672	0	4	7	0	0.210526	0.368421	0	4	0	0.666667	2
16196	63546.8	11.0595	0	0.0312526	Santa María de los Llanos	680	6.52209	0.470588	0.0470588	0.263235	0.160294	0	0	0	1	0.503408	0	7	25	0	0.145833	0.520833	0	4	0	0.8	2
16197	0	0	1	0	Santa María del Val	61	4.11087	0.47541	0	0.180328	0.295082	0	0	0	1	0	0	0	0	0	0	0	0	0	0	0	1
16198	55453.8	10.9233	0	0	Sisante	1618	7.38895	0.487639	0.0580964	0.283066	0.146477	0	1	1	1	0.252766	4	25	49	0.0366972	0.229358	0.449541	4	4	0.129032	0.129032	2
16199	0	0	0	0	Solera de Gabaldón	36	3.58352	0.388889	0	0.111111	0.277778	0	0	0	0	0	0	0	0	0	0	0	0	0	0	0	1
16202	33902.6	10.4312	1	0	Talayuelas	856	6.75227	0.466121	0.046729	0.254673	0.16472	0	0	0	1	0.478561	4	9	14	0.08	0.18	0.28	0	4	0	0.8	1
16203	0	0	0	0.0793124	Tarancón	15799	9.6677	0.505981	0.0774733	0.34211	0.0863979	1	1	1	1	0	47	265	418	0.0442978	0.249764	0.393968	34	319	0.042394	0.397756	2
16204	12182.5	9.40775	1	0	Tébar	287	5.65948	0.463415	0.0522648	0.28223	0.12892	0	0	0	0	0.6947	4	4	11	0.142857	0.142857	0.392857	0	4	0	0.571429	2
16205	0	0	1	0	Tejadillos	113	4.72739	0.548673	0.0530973	0.300885	0.19469	1	0	0	0	0	0	4	7	0	0.5	0.875	0	0	0	0	1
16206	37251.8	10.5255	1	0	Tinajas	196	5.27811	0.454082	0.0510204	0.178571	0.22449	0	0	0	1	0.882	0	0	4	0	0	0.5	0	0	0	0	1
16209	76992.6	11.2515	0	0	Torralba	109	4.69135	0.40367	0	0.192661	0.211009	0	0	0	1	0.380463	4	0	4	0.8	0	0.8	4	4	0.4	0.4	1
16211	0	0	1	0	Torrejoncillo del Rey	345	5.84354	0.446377	0.0115942	0.197101	0.237681	0	0	0	1	0	0	4	7	0	0.222222	0.388889	4	0	0.571429	0	1
16212	15937.8	9.67645	0	0	Torrubia del Campo	296	5.69036	0.506757	0.0506757	0.293919	0.162162	1	0	0	0	0.162042	0	4	9	0	0.235294	0.529412	4	0	1	0	2
16213	10294	9.23932	0	0	Torrubia del Castillo	41	3.71357	0.341463	0	0.170732	0.170732	0	0	0	1	0.624282	0	0	0	0	0	0	0	0	0	0	1
16215	48350.1	10.7862	1	0	Tragacete	277	5.62402	0.436823	0.0252708	0.249097	0.162455	0	0	0	1	0.854838	0	4	6	0	0.333333	0.5	0	0	0	0	1
16216	0	0	0	0	Tresjuncos	268	5.59099	0.451493	0.0149254	0.235075	0.201493	0	0	0	0	0	4	4	6	0.285714	0.285714	0.428571	0	4	0	1	2
16217	0	0	0	0	Tribaldos	99	4.59512	0.444444	0.020202	0.20202	0.222222	0	0	0	1	0	0	4	4	0	1	1	0	4	0	1	2
16218	176918	12.0834	0	0	Uclés	222	5.40268	0.481982	0.00900901	0.310811	0.162162	0	0	0	0	0.86	0	4	4	0	0.307692	0.307692	0	9	0	0.75	2
16219	8382.15	9.03386	1	0	Uña	84	4.43082	0.452381	0.0119048	0.27381	0.166667	0	0	0	1	0.420431	0	0	4	0	0	1	0	0	0	0	1
16224	3850.25	8.25589	1	0	Valdemeca	74	4.30407	0.418919	0.027027	0.27027	0.121622	0	0	0	0	0.7977	0	0	0	0	0	0	0	4	0	1	1
16225	25806	10.1584	1	0	Valdemorillo de la Sierra	54	3.98898	0.407407	0.0185185	0.166667	0.222222	0	0	0	1	0.8602	0	0	0	0	0	0	0	0	0	0	1
16227	12293.9	9.41686	1	0	Valdemoro-Sierra	104	4.64439	0.432692	0.00961538	0.259615	0.163462	0	0	0	0	0.8835	0	0	4	0	0	1	0	0	0	0	1
16228	23871.9	10.0805	0	0	Valdeolivas	218	5.3845	0.376147	0.0183486	0.224771	0.133028	0	0	0	1	0.340153	0	0	4	0	0	0.5	0	0	0	0	1
16231	0	0	0	0	Valhermoso de la Fuente	42	3.73767	0.47619	0.0952381	0.142857	0.238095	0	0	0	0	0	0	0	4	0	0	1	0	0	0	0	2
16234	0	0	0	0	Valsalobre	21	3.04452	0.47619	0	0.142857	0.333333	0	0	0	0	0	0	0	0	0	0	0	0	0	0	0	1
16236	20743.6	9.93999	0	0.13292	Valverde de Júcar	1091	6.99485	0.504125	0.055912	0.288726	0.159487	1	0	0	1	0.649699	4	15	21	0.0645161	0.241935	0.33871	0	4	0	0.571429	1
16237	0	0	0	0	Valverdejo	94	4.54329	0.489362	0.0106383	0.255319	0.223404	0	0	0	1	0	0	4	4	0	0.571429	0.571429	4	0	1	0	2
16238	43433.3	10.679	0	0	Vara de Rey	460	6.13123	0.478261	0.026087	0.25	0.202174	0	0	0	1	0.62	0	5	19	0	0.142857	0.542857	4	0	1	0	2
16239	3422.61	8.13816	0	0	Vega del Codorno	132	4.8828	0.386364	0.00757576	0.257576	0.121212	0	0	0	1	0.709101	0	4	4	0	0.571429	0.571429	0	0	0	0	1
16240	20504.9	9.92842	1	0	Vellisca	114	4.7362	0.447368	0.00877193	0.22807	0.210526	0	0	0	0	0.227952	4	4	0	0.8	0.8	0	0	0	0	0	1
16242	0	0	1	0	Villaconejos de Trabaque	323	5.77765	0.479876	0.0588235	0.244582	0.176471	0	0	0	1	0	0	4	6	0	0.307692	0.461538	0	4	0	1	1
16243	0	0	0	0	Villaescusa de Haro	474	6.16121	0.485232	0.0168776	0.28903	0.179325	0	0	0	0	0	4	4	11	0.166667	0.166667	0.458333	0	4	0	0.571429	2
16244	53391.2	10.8854	0	0	Villagarcía del Llano	697	6.54679	0.500717	0.035868	0.301291	0.163558	1	1	0	0	0.297604	4	9	30	0.0816327	0.183673	0.612245	4	0	1	0	2
16245	591201	13.2899	1	0.00810458	Villalba de la Sierra	484	6.18208	0.508264	0.0371901	0.330579	0.140496	1	0	0	1	0.71572	0	5	11	0	0.16129	0.354839	0	4	0	0.666667	1
16246	91104.8	11.4198	0	0	Villalba del Rey	481	6.17587	0.463617	0.024948	0.24948	0.189189	0	0	0	1	0.640373	0	4	7	0	0.153846	0.269231	4	4	0.5	0.5	1
16247	9520	9.16115	0	0	Villalgordo del Marquesado	66	4.18965	0.409091	0.0151515	0.181818	0.212121	0	0	0	0	0.85	0	0	0	0	0	0	0	0	0	0	2
16248	22869	10.0375	0	0	Villalpardo	1013	6.92067	0.502468	0.0542942	0.321816	0.126357	1	0	0	1	0.9	4	11	29	0.0677966	0.186441	0.491525	0	15	0	0.576923	2
16249	136257	11.8223	0	0	Villamayor de Santiago	2433	7.79688	0.487053	0.0517879	0.297575	0.13769	0	1	1	1	0.338125	4	37	62	0.0254777	0.235669	0.394904	4	14	0.1	0.35	2
16250	0	0	0	0	Villanueva de Guadamejud	64	4.15888	0.359375	0	0.125	0.234375	0	0	0	0	0	0	0	4	0	0	1	0	4	0	1	1
16251	177849	12.0887	0	0.953724	Villanueva de la Jara	2287	7.735	0.494534	0.0594666	0.311325	0.123743	0	1	1	1	0.371145	7	31	43	0.0619469	0.274336	0.380531	9	7	0.176471	0.137255	2
16253	15777.8	9.66636	0	0	Villar de Cañas	385	5.95324	0.457143	0.0493506	0.233766	0.174026	0	0	0	1	0.830662	0	5	8	0	0.217391	0.347826	0	0	0	0	1
16254	0	0	0	0	Villar de Domingo García	222	5.40268	0.495495	0.0315315	0.265766	0.198198	0	0	0	1	0	0	4	4	0	0.5	0.5	0	4	0	1	1
16255	30883	10.338	0	0	Villar de la Encina	161	5.0814	0.484472	0.0248447	0.279503	0.180124	0	0	0	1	0.374783	0	4	4	0	0.571429	0.571429	0	0	0	0	2
16258	0	0	1	0	Villar del Humo	169	5.1299	0.455621	0.0414201	0.207101	0.207101	0	0	0	1	0	4	4	4	0.666667	0.666667	0.666667	0	4	0	1	1
16259	0	0	0	0.467952	Villar del Infantado	39	3.66356	0.435897	0.0512821	0.25641	0.128205	0	0	0	0	0	0	0	0	0	0	0	0	0	0	0	1
16263	16322.9	9.70032	1	0.00182364	Villar de Olalla	1356	7.21229	0.466077	0.0648968	0.307522	0.0936578	0	0	0	1	0.76	6	12	10	0.109091	0.218182	0.181818	0	5	0	0.208333	1
16264	37735.9	10.5384	0	0	Villarejo de Fuentes	392	5.97126	0.5	0.0280612	0.234694	0.237245	0	0	0	1	0.446999	0	4	8	0	0.25	0.5	4	0	1	0	2
16265	0	0	0	0	Villarejo de la Peñuela	23	3.13549	0.434783	0	0.217391	0.217391	0	0	0	1	0	0	0	0	0	0	0	0	0	0	0	1
16266	95343.4	11.4652	0	0	Villarejo-Periesteban	383	5.94803	0.490862	0.0287206	0.24282	0.219321	0	0	0	1	0.475338	4	4	6	0.210526	0.210526	0.315789	4	0	1	0	1
16269	17108.3	9.74732	0	0	Villares del Saz	468	6.14847	0.476496	0.0277778	0.254274	0.194444	0	0	0	0	0.636514	4	4	5	0.25	0.25	0.3125	4	4	0.8	0.8	1
16270	321116	12.6796	0	0	Villarrubio	189	5.24175	0.460317	0.047619	0.285714	0.126984	0	0	0	1	0.355054	0	4	4	0	0.5	0.5	4	0	1	0	2
16271	0	0	0	0	Villarta	789	6.67077	0.505703	0.0481622	0.318124	0.139417	1	0	0	1	0	0	5	16	0	0.131579	0.421053	4	4	0.5	0.5	2
16272	16036.4	9.68261	0	0	Villas de la Ventosa	210	5.34711	0.433333	0.00952381	0.228571	0.195238	0	0	0	1	0.299506	4	4	4	1	1	1	0	4	0	1	1
16273	15400.9	9.64218	0	0	Villaverde y Pasaconsol	338	5.82305	0.467456	0.0325444	0.230769	0.204142	0	0	0	0	0.848533	0	5	4	0	0.333333	0.266667	4	4	1	1	1
16274	115569	11.6576	1	0	Víllora	141	4.94876	0.439716	0.0141844	0.205674	0.219858	0	0	0	0	0.827205	0	0	4	0	0	0.8	0	0	0	0	1
16275	0	0	1	0	Vindel	12	2.48491	0.333333	0	0	0.333333	0	0	0	0	0	0	0	0	0	0	0	0	0	0	0	1
16276	0	0	0	0	Yémeda	17	2.83321	0.294118	0	0.176471	0.117647	0	0	0	0	0	0	0	0	0	0	0	0	0	0	0	1
16277	0	0	0	0	Zafra de Záncara	100	4.60517	0.44	0.01	0.14	0.29	0	0	0	0	0	0	0	4	0	0	0.666667	4	0	1	0	1
16278	0	0	1	0	Zafrilla	55	4.00733	0.472727	0	0.290909	0.181818	0	0	0	0	0	4	4	4	1	1	1	4	4	0.266667	0.266667	1
16279	0	0	1	0	Zarza de Tajo	268	5.59099	0.451493	0.0410448	0.279851	0.130597	0	0	0	1	0	4	4	4	0.266667	0.266667	0.266667	4	0	1	0	2
16280	4048.97	8.30622	0	0	Zarzuela	154	5.03695	0.441558	0.00649351	0.155844	0.279221	0	0	0	1	0.648499	0	0	4	0	0	0.363636	4	0	1	0	1
16901	801180	13.5938	1	0	Campos del Paraíso	691	6.53814	0.483357	0.0361795	0.23589	0.211288	0	0	0	1	0.851759	4	5	7	0.142857	0.178571	0.25	4	4	0.8	0.8	2
16902	14640.9	9.59157	1	0.0327622	Valdetórtola	127	4.84419	0.433071	0.015748	0.212598	0.204724	0	0	0	0	0.86	4	4	0	1	1	0	0	0	0	0	1
16903	74674.9	11.2209	1	0	Valeras (Las)	1499	7.31255	0.468979	0.0426951	0.312875	0.113409	0	1	0	1	1.37674	4	22	47	0.040404	0.222222	0.474747	4	0	0.571429	0	1
16904	263834	12.4831	0	0.446789	Fuentenava de Jábaga	546	6.30262	0.47619	0.047619	0.342491	0.0860806	0	0	0	0	0.367928	0	4	7	0	0.173913	0.304348	4	4	0.8	0.8	1
16905	30568.6	10.3277	1	0.839251	Arcas del Villar	1994	7.5979	0.499498	0.0862588	0.3666	0.0466399	0	0	0	1	0.775288	5	32	26	0.0537634	0.344086	0.27957	0	6	0	0.545455	1
16906	30494.4	10.3253	0	0	Valdecolmenas (Los)	74	4.30407	0.351351	0	0.0945946	0.256757	0	0	0	0	0.779927	0	0	0	0	0	0	0	0	0	0	1
16908	33990	10.4338	1	0	Pozorrubielos de la Mancha	173	5.15329	0.462428	0.017341	0.213873	0.231214	0	0	0	1	0.33	0	5	6	0	0.25	0.3	4	0	1	0	2
16909	39533.5	10.5849	0	0.0290636	Sotorribas	696	6.54535	0.479885	0.033046	0.274425	0.172414	0	0	0	1	0.398008	4	8	7	0.153846	0.307692	0.269231	0	0	0	0	1
16910	1722.12	7.45131	0	0	Villar y Velasco	79	4.36945	0.443038	0.0126582	0.202532	0.227848	0	0	0	1	0.824652	0	0	0	0	0	0	0	4	0	1	1
19001	0	0	1	0	Abánades	61	4.11087	0.393443	0.0163934	0.163934	0.213115	0	0	0	1	0	0	4	4	0	0.8	0.8	4	0	1	0	1
19002	0	0	0	0	Ablanque	63	4.14313	0.444444	0	0.238095	0.206349	0	0	0	1	0	0	0	0	0	0	0	0	4	0	1	1
19003	13427.4	9.50505	0	0	Adobes	28	3.3322	0.428571	0	0.25	0.178571	0	0	0	1	0.81	0	0	0	0	0	0	4	0	1	0	1
19004	6035.68	8.70544	0	0	Alaminos	56	4.02535	0.517857	0	0.267857	0.25	1	0	0	0	0.749901	0	0	4	0	0	1	4	4	1	1	1
19005	20855.8	9.94539	1	0.0032961	Alarilla	136	4.91265	0.382353	0.0514706	0.227941	0.102941	0	0	0	1	0.799985	0	4	4	0	0.571429	0.571429	0	0	0	0	1
19006	17614.6	9.77649	1	0.982317	Albalate de Zorita	1056	6.96224	0.445076	0.0464015	0.270833	0.127841	0	0	0	1	0.713432	4	18	32	0.0434783	0.195652	0.347826	4	0	1	0	1
19007	26996.2	10.2035	0	0.119087	Albares	518	6.24998	0.482625	0.042471	0.264479	0.175676	0	0	0	1	0.467637	0	8	10	0	0.228571	0.285714	0	4	0	1	1
19008	0	0	1	0	Albendiego	46	3.82864	0.326087	0.0434783	0.217391	0.0652174	0	0	0	0	0	4	4	4	1	1	1	0	0	0	0	1
19009	42463	10.6564	0	0	Alcocer	315	5.75257	0.488889	0.0285714	0.263492	0.196825	0	0	0	0	0.471368	0	4	4	0	0.444444	0.444444	0	4	0	1	1
19010	0	0	1	0	Alcolea de las Peñas	12	2.48491	0.333333	0.0833333	0.166667	0.0833333	0	0	0	1	0	0	0	0	0	0	0	0	0	0	0	1
19011	15000	9.61581	0	0	Alcolea del Pinar	326	5.7869	0.420245	0.0398773	0.230061	0.150307	0	0	0	1	0.592067	4	4	6	0.307692	0.307692	0.461538	4	0	1	0	1
19013	35115.4	10.4664	1	0	Alcoroches	122	4.80402	0.401639	0.00819672	0.254098	0.139344	0	0	0	1	0.518191	0	0	0	0	0	0	0	4	0	1	1
19015	21000	9.95228	0	0	Aldeanueva de Guadalajara	106	4.66344	0.40566	0.0283019	0.160377	0.216981	0	0	0	0	0.307394	0	0	4	0	0	1	0	0	0	0	1
19016	12773.1	9.4551	1	0	Algar de Mesa	48	3.8712	0.291667	0	0.1875	0.104167	0	0	0	0	0.81	0	0	0	0	0	0	0	0	0	0	1
19017	297051	12.6017	1	0	Algora	80	4.38203	0.375	0	0.1875	0.1875	0	0	0	0	0.379861	0	4	4	0	1	1	4	4	1	1	1
19018	0	0	0	0	Alhóndiga	158	5.0626	0.424051	0.0189873	0.196203	0.208861	0	0	0	1	0	0	4	4	0	0.8	0.8	0	0	0	0	1
19019	2359.5	7.76621	0	0	Alique	13	2.56495	0.538462	0	0.0769231	0.461538	1	0	0	0	0.75	0	0	4	0	0	1	0	0	0	0	1
19020	47114.2	10.7603	0	0	Almadrones	54	3.98898	0.333333	0.0185185	0.166667	0.148148	0	0	0	0	0.575711	0	0	0	0	0	0	4	0	0.105263	0	1
19021	75602.2	11.2332	1	0.96089	Almoguera	1284	7.15774	0.494548	0.0584112	0.331776	0.104361	0	0	0	1	0.522391	5	24	25	0.0568182	0.272727	0.284091	0	4	0	0.285714	1
19022	75907.1	11.2373	1	0.978079	Almonacid de Zorita	659	6.49072	0.488619	0.0333839	0.264036	0.191199	0	0	0	1	0.420428	4	6	11	0.0888889	0.133333	0.244444	0	6	0	0.75	1
19023	0	0	1	0	Alocén	159	5.0689	0.496855	0.0691824	0.333333	0.0943396	0	0	0	1	0	0	0	0	0	0	0	4	0	1	0	1
19024	104214	11.5542	0	0.352058	Alovera	13142	9.48357	0.490108	0.0914625	0.354436	0.0442094	0	1	1	1	0.453628	29	167	243	0.0421512	0.242733	0.353198	26	171	0.0666667	0.438462	6
19027	34837.2	10.4584	1	0	Alustante	145	4.97673	0.413793	0.0137931	0.213793	0.186207	0	0	0	0	0.450439	4	4	4	0.571429	0.571429	0.571429	4	0	1	0	1
19031	52482.7	10.8682	1	0	Angón	10	2.30259	0.2	0	0	0.2	0	0	0	0	0.9	0	0	0	0	0	0	0	0	0	0	1
19032	22059.9	10.0015	1	0	Anguita	155	5.04343	0.458065	0.0258065	0.193548	0.23871	0	0	0	1	0.726822	0	0	4	0	0	0.571429	0	0	0	0	1
19033	0	0	1	0	Anquela del Ducado	54	3.98898	0.407407	0	0.222222	0.185185	0	0	0	1	0	0	0	4	0	0	1	0	0	0	0	1
19034	0	0	1	0	Anquela del Pedregal	26	3.2581	0.423077	0	0.192308	0.230769	0	0	0	1	0	0	0	0	0	0	0	0	0	0	0	1
19036	12460.3	9.43031	0	0	Aranzueque	358	5.88053	0.455307	0.0726257	0.231844	0.150838	0	0	0	1	0.557582	4	8	8	0.181818	0.363636	0.363636	4	4	1	1	1
19037	25239.5	10.1362	1	0	Arbancón	145	4.97673	0.406897	0.0275862	0.248276	0.131034	0	0	0	1	0.896378	0	4	4	0	0.666667	0.666667	4	0	1	0	1
19038	8633.39	9.06339	0	0	Arbeteta	19	2.94444	0.210526	0	0.0526316	0.157895	0	0	0	1	0.771366	0	0	0	0	0	0	0	0	0	0	1
19039	0	0	0	0	Argecilla	70	4.2485	0.328571	0.0285714	0.128571	0.171429	0	0	0	0	0	0	0	4	0	0	1	0	0	0	0	1
19040	100469	11.5176	0	0	Armallones	50	3.91202	0.44	0	0.24	0.2	0	0	0	0	0.277454	0	0	4	0	0	1	0	0	0	0	1
19041	18896.5	9.84673	1	0	Armuña de Tajuña	254	5.53733	0.496063	0.0866142	0.338583	0.0708661	0	0	0	0	0.780845	4	4	7	0.210526	0.210526	0.368421	0	0	0	0	1
19042	0	0	0	0	Arroyo de las Fraguas	23	3.13549	0.478261	0	0.217391	0.26087	0	0	0	1	0	0	0	0	0	0	0	0	0	0	0	1
19043	61219.3	11.0222	0	0	Atanzón	97	4.57471	0.340206	0	0.103093	0.237113	0	0	0	1	0.385225	0	0	0	0	0	0	0	0	0	0	1
19044	27406.7	10.2185	0	0	Atienza	398	5.98645	0.419598	0.0251256	0.273869	0.120603	0	0	0	1	0.73169	0	4	4	0	0.307692	0.307692	4	4	1	1	1
19045	0	0	1	0	Auñón	151	5.01728	0.443709	0.00662252	0.198675	0.238411	0	0	0	1	0	0	4	4	0	0.666667	0.666667	0	0	0	0	1
19046	0	0	0	0.35077	Azuqueca de Henares	35182	10.4683	0.495907	0.0856688	0.344551	0.065687	0	1	0	1	0	68	594	731	0.0312213	0.272727	0.335629	106	568	0.066416	0.35589	6
19047	0	0	0	0	Baides	60	4.09434	0.5	0.0333333	0.333333	0.133333	0	0	0	0	0	0	0	0	0	0	0	0	0	0	0	1
19048	13623.4	9.51954	0	0	Baños de Tajo	17	2.83321	0.294118	0	0.176471	0.117647	0	0	0	0	0.81	0	0	0	0	0	0	0	0	0	0	1
19049	0	0	0	0	Bañuelos	14	2.63906	0.142857	0	0.142857	0	0	0	0	0	0	0	0	0	0	0	0	0	0	0	0	1
19050	0	0	1	0	Barriopedro	19	2.94444	0.368421	0	0.210526	0.157895	0	0	0	0	0	0	0	4	0	0	1	0	0	0	0	1
19051	66523.3	11.1053	0	0	Berninches	52	3.95124	0.326923	0	0.173077	0.153846	0	0	0	0	0.378636	0	0	0	0	0	0	0	0	0	0	1
19052	5926.78	8.68724	0	0	Bodera (La)	22	3.09104	0.318182	0	0	0.318182	0	0	0	0	0.7875	0	0	0	0	0	0	0	0	0	0	1
19053	861773	13.6667	1	0	Brihuega	2511	7.82844	0.479092	0.0565512	0.292314	0.130227	0	1	1	1	0.506929	4	34	49	0.027027	0.22973	0.331081	5	6	0.208333	0.25	1
19054	57553.4	10.9605	0	0	Budia	197	5.2832	0.406091	0.0456853	0.203046	0.15736	0	0	0	0	0.631058	0	0	0	0	0	0	0	0	0	0	1
19055	0	0	0	0	Bujalaro	44	3.78419	0.5	0.0681818	0.272727	0.159091	0	0	0	0	0	0	0	4	0	0	1	0	0	0	0	1
19057	0	0	1	0	Bustares	71	4.26268	0.394366	0.028169	0.197183	0.169014	0	0	0	0	0	0	0	4	0	0	1	0	0	0	0	1
19058	89309.3	11.3999	0	0.991083	Cabanillas del Campo	10968	9.30274	0.4969	0.0847921	0.358315	0.0537929	0	1	0	1	0.373026	21	91	208	0.0423387	0.183468	0.419355	85	298	0.0990676	0.347319	6
19059	100486	11.5178	1	0	Campillo de Dueñas	80	4.38203	0.4	0.05	0.175	0.175	0	0	0	0	0.327853	0	4	0	0	1	0	0	0	0	0	1
19060	7930.48	8.97847	1	0	Campillo de Ranas	109	4.69135	0.348624	0.0183486	0.238532	0.0917431	0	0	0	0	0.457211	0	4	4	0	0.307692	0.307692	4	4	1	1	1
19061	0	0	1	0	Campisábalos	67	4.20469	0.313433	0	0.208955	0.104478	0	0	0	0	0	0	0	4	0	0	1	0	0	0	0	1
19064	15000	9.61581	0	0	Canredondo	76	4.33073	0.368421	0.0131579	0.118421	0.236842	0	0	0	0	0.54813	0	0	4	0	0	1	0	0	0	0	1
19065	0	0	1	0	Cantalojas	135	4.90527	0.437037	0.0592593	0.274074	0.103704	0	0	0	1	0	4	0	4	1	0	1	0	4	0	1	1
19066	8378.81	9.03346	0	0	Cañizar	57	4.04305	0.403509	0	0.157895	0.245614	0	0	0	1	0.520422	0	4	0	0	1	0	0	0	0	0	1
19067	95491.8	11.4668	1	0	Cardoso de la Sierra (El)	49	3.89182	0.367347	0	0.204082	0.163265	0	0	0	1	0.351073	0	0	0	0	0	0	0	0	0	0	1
19070	21000	9.95228	1	0	Casa de Uceda	92	4.52179	0.445652	0.0543478	0.217391	0.173913	0	0	0	0	0.530489	0	0	4	0	0	1	0	0	0	0	1
19071	0	0	0	0.487348	Casar (El)	12919	9.46645	0.495007	0.0890936	0.351343	0.0545708	0	1	0	1	0	19	127	262	0.0291411	0.194785	0.40184	7	22	0.142857	0.44898	6
19073	0	0	1	0	Casas de San Galindo	21	3.04452	0.285714	0	0.190476	0.0952381	0	0	0	0	0	0	0	0	0	0	0	0	0	0	0	1
19074	11617	9.36022	0	0	Caspueñas	119	4.77912	0.378151	0.0168067	0.260504	0.10084	0	0	0	0	0.594478	0	0	0	0	0	0	0	0	0	0	1
19075	0	0	0	0	Castejón de Henares	61	4.11087	0.360656	0.0327869	0.196721	0.131148	0	0	0	0	0	0	0	4	0	0	1	0	0	0	0	1
19076	17577	9.77435	1	0	Castellar de la Muela	27	3.29584	0.481481	0	0.185185	0.296296	0	0	0	0	0.4185	0	0	0	0	0	0	0	0	0	0	1
19078	41780	10.6402	0	0	Castilforte	56	4.02535	0.357143	0.0178571	0.196429	0.142857	0	0	0	0	0.679877	0	0	4	0	0	1	0	0	0	0	1
19079	11538.2	9.35342	0	0.417972	Castilnuevo	6	1.79176	0.166667	0	0.166667	0	0	0	0	0	0	0	0	0	0	0	0	0	0	0	0	1
19080	0	0	0	0	Cendejas de Enmedio	67	4.20469	0.477612	0.0298507	0.164179	0.283582	0	0	0	1	0	0	0	0	0	0	0	0	0	0	0	1
19081	0	0	0	0	Cendejas de la Torre	24	3.17805	0.291667	0	0.125	0.166667	0	0	0	0	0	0	0	0	0	0	0	0	0	0	0	1
19082	21509	9.97623	0	0	Centenera	144	4.96981	0.423611	0.0347222	0.305556	0.0833333	0	0	0	0	0.438592	0	4	5	0	0.4	0.5	0	0	0	0	1
19086	275374	12.5259	0	0.442409	Cifuentes	1625	7.39326	0.494154	0.0412308	0.288615	0.164308	0	1	0	1	0.644073	4	16	35	0.0571429	0.228571	0.5	4	4	0.8	0.8	1
19087	0	0	1	0	Cincovillas	27	3.29584	0.481481	0	0.185185	0.296296	0	0	0	0	0	0	0	0	0	0	0	0	0	0	0	1
19088	86798.7	11.3713	1	0	Ciruelas	120	4.78749	0.433333	0.0416667	0.25	0.141667	0	0	0	0	0.319246	0	4	4	0	0.5	0.5	0	0	0	0	1
19089	0	0	1	0	Ciruelos del Pinar	24	3.17805	0.416667	0	0.25	0.166667	0	0	0	0	0	0	0	0	0	0	0	0	0	0	0	1
19090	27799.2	10.2328	0	0	Cobeta	108	4.68213	0.509259	0.0648148	0.259259	0.185185	1	0	0	0	0.479739	0	0	0	0	0	0	0	0	0	0	1
19091	0	0	0	0	Cogollor	20	2.99573	0.35	0	0.2	0.15	0	0	0	1	0	0	0	4	0	0	1	0	0	0	0	1
19092	212011	12.2644	1	0	Cogolludo	563	6.33328	0.415631	0.044405	0.257549	0.113677	0	0	0	0	0.393311	0	4	5	0	0.210526	0.263158	4	7	0.363636	0.636364	1
19095	0	0	1	0	Condemios de Abajo	11	2.3979	0.181818	0	0.0909091	0.0909091	0	0	0	1	0	0	0	0	0	0	0	0	0	0	0	1
19096	7827.63	8.96542	1	0	Condemios de Arriba	106	4.66344	0.415094	0.0188679	0.254717	0.141509	0	0	0	1	0.7875	0	0	4	0	0	1	0	0	0	0	1
19097	0	0	1	0	Congostrina	13	2.56495	0.230769	0	0.153846	0.0769231	0	0	0	1	0	0	0	0	0	0	0	0	0	0	0	1
19098	20807	9.94305	0	0	Copernal	34	3.52636	0.323529	0	0.176471	0.147059	0	0	0	0	0.55461	0	0	0	0	0	0	0	0	0	0	1
19099	125408	11.7393	1	0	Corduente	324	5.78074	0.432099	0.0493827	0.265432	0.117284	0	0	0	1	0.68656	0	4	5	0	0.285714	0.357143	0	4	0	1	1
19102	21000	9.95228	0	0.0489507	Cubillo de Uceda (El)	121	4.79579	0.429752	0.0578512	0.239669	0.132231	0	0	0	0	0.569895	0	0	4	0	0	0.4	4	0	1	0	1
19103	91015.7	11.4188	1	0	Checa	286	5.65599	0.391608	0.0314685	0.206294	0.153846	0	0	0	0	0.596479	0	4	4	0	0.571429	0.571429	4	0	1	0	1
19104	5710.61	8.65008	1	0	Chequilla	16	2.77259	0.4375	0	0.25	0.1875	0	0	0	0	0.738	0	0	0	0	0	0	0	0	0	0	1
19105	152124	11.9325	0	0.63501	Chiloeches	3858	8.2579	0.482115	0.0933126	0.332556	0.0562468	0	1	0	1	0.218502	8	36	71	0.0449438	0.202247	0.398876	4	18	0.0555556	0.25	6
19106	1914.83	7.55738	1	0	Chillarón del Rey	85	4.44265	0.447059	0.0117647	0.247059	0.188235	0	0	0	0	0.750002	0	0	4	0	0	0.666667	0	0	0	0	1
19107	62446.6	11.0421	0	0.0217771	Driebes	355	5.87212	0.44507	0.0478873	0.230986	0.166197	0	0	0	1	0.436179	0	4	4	0	0.307692	0.307692	0	0	0	0	1
19108	33299	10.4133	0	0	Durón	109	4.69135	0.431193	0	0.229358	0.201835	0	0	0	1	0.253956	0	0	4	0	0	0.8	0	0	0	0	1
19109	14913.9	9.61005	1	0	Embid	28	3.3322	0.392857	0	0.178571	0.214286	0	0	0	0	0.747	0	0	4	0	0	1	0	0	0	0	1
19110	21563.1	9.97874	0	0	Escamilla	63	4.14313	0.333333	0	0.15873	0.174603	0	0	0	0	0.79919	0	4	4	0	1	1	0	0	0	0	1
19111	0	0	0	0	Escariche	186	5.22575	0.387097	0.0107527	0.215054	0.16129	0	0	0	1	0	0	4	6	0	0.25	0.375	0	0	0	0	1
19112	7027.68	8.85761	0	0	Escopete	68	4.21951	0.455882	0.0147059	0.264706	0.176471	0	0	0	1	0.88	0	0	0	0	0	0	0	0	0	0	1
19113	91785.1	11.4272	1	0.797328	Espinosa de Henares	625	6.43775	0.4912	0.056	0.2992	0.136	0	0	0	0	0.271116	0	4	15	0	0.142857	0.535714	4	4	0.571429	0.571429	1
19114	15000	9.61581	1	0	Esplegares	33	3.49651	0.454545	0	0.333333	0.121212	0	0	0	0	0.636456	0	0	0	0	0	0	0	0	0	0	1
19115	9641.06	9.17379	0	0	Establés	29	3.3673	0.413793	0.0689655	0.241379	0.103448	0	0	0	1	0.334965	0	0	0	0	0	0	0	0	0	0	1
19116	0	0	0	0	Estriégana	12	2.48491	0.25	0	0.0833333	0.166667	0	0	0	0	0	0	0	0	0	0	0	0	0	0	0	1
19117	32702.7	10.3952	1	0	Fontanar	2567	7.85049	0.476432	0.0864823	0.333074	0.0568757	0	1	0	1	0.446206	4	33	40	0.0300752	0.24812	0.300752	4	9	0.117647	0.264706	6
19118	14113.4	9.55488	1	0	Fuembellida	12	2.48491	0.333333	0.0833333	0.25	0	0	0	0	0	0.81	0	4	0	0	1	0	0	0	0	0	1
19119	12000	9.39266	1	0.0131279	Fuencemillán	79	4.36945	0.379747	0	0.265823	0.113924	0	0	0	0	0.865307	0	4	4	0	0.444444	0.444444	0	0	0	0	1
19120	21000	9.95228	0	0	Fuentelahiguera de Albatages	130	4.86753	0.415385	0.00769231	0.253846	0.153846	0	0	0	1	0.443344	0	4	4	0	0.666667	0.666667	0	0	0	0	1
19121	67527.3	11.1203	0	0	Fuentelencina	314	5.74939	0.474522	0.0318471	0.273885	0.16879	0	0	0	1	0.412918	0	5	5	0	0.3125	0.3125	0	4	0	0.666667	1
19122	0	0	0	0	Fuentelsaz	88	4.47734	0.488636	0.0454545	0.238636	0.204545	0	0	0	0	0	0	0	4	0	0	1	0	4	0	1	1
19123	0	0	1	0	Fuentelviejo	52	3.95124	0.403846	0	0.25	0.153846	0	0	0	1	0	0	0	4	0	0	1	0	0	0	0	1
19124	0	0	0	0.619755	Fuentenovilla	568	6.34212	0.440141	0.0651408	0.278169	0.096831	0	0	0	0	0	4	7	18	0.0784314	0.137255	0.352941	0	4	0	1	1
19125	32252	10.3813	0	0	Gajanejos	61	4.11087	0.393443	0.0163934	0.278689	0.0983607	0	0	0	0	0.740146	0	0	0	0	0	0	0	0	0	0	1
19126	18000	9.79813	0	0.648215	Galápagos	2600	7.86327	0.479615	0.0988462	0.339615	0.0411538	0	1	0	1	0.360096	12	32	66	0.0705882	0.188235	0.388235	0	5	0	0.625	6
19127	20625	9.93426	1	0	Galve de Sorbe	96	4.56435	0.458333	0.0104167	0.208333	0.239583	0	0	0	1	0.825	0	0	4	0	0	1	0	0	0	0	1
19129	0	0	0	0	Gascueña de Bornova	30	3.4012	0.4	0	0.233333	0.166667	0	0	0	0	0	0	0	0	0	0	0	0	0	0	0	1
19130	0	0	1	0.920523	Guadalajara	87452	11.3788	0.518662	0.073366	0.34029	0.105006	1	1	0	1	0	175	1013	1389	0.0407166	0.235691	0.323174	286	746	0.133958	0.349415	7
19132	7310.31	8.89704	0	0	Henche	82	4.40672	0.47561	0.0243902	0.158537	0.292683	0	0	0	0	0.364768	0	4	0	0	1	0	0	0	0	0	1
19133	60000	11.0021	1	0	Heras de Ayuso	231	5.44242	0.445887	0.0779221	0.277056	0.0909091	0	0	0	0	0.423678	0	4	4	0	0.4	0.4	0	4	0	1	1
19134	0	0	1	0	Herrería	24	3.17805	0.375	0	0.25	0.125	0	0	0	0	0	0	0	0	0	0	0	0	0	0	0	1
19135	8121.75	9.0023	1	0	Hiendelaencina	115	4.74493	0.373913	0.026087	0.156522	0.191304	0	0	0	1	0.727451	0	4	0	0	1	0	0	0	0	0	1
19136	0	0	1	0	Hijes	19	2.94444	0.421053	0.105263	0.263158	0.0526316	0	0	0	0	0	0	4	4	0	1	1	0	0	0	0	1
19138	19500	9.87817	0	0.000746089	Hita	325	5.78383	0.44	0.0430769	0.298462	0.0984615	0	0	0	1	0.529862	0	5	7	0	0.208333	0.291667	0	4	0	1	1
19139	0	0	1	0	Hombrados	45	3.80666	0.4	0.0888889	0.111111	0.2	0	0	0	1	0	0	0	4	0	0	1	0	0	0	0	1
19142	17655.1	9.77878	0	0	Hontoba	390	5.96615	0.435897	0.0564103	0.292308	0.0871795	0	0	0	0	0.548859	4	7	13	0.108108	0.189189	0.351351	0	4	0	1	1
19143	40000	10.5966	0	0	Horche	2751	7.91972	0.498001	0.0876045	0.330425	0.0799709	0	1	0	1	0.429571	7	34	56	0.05	0.242857	0.4	6	8	0.315789	0.421053	6
19145	40445.7	10.6077	0	0	Hortezuela de Océn	38	3.63759	0.394737	0	0.184211	0.210526	0	0	0	0	0.82	0	0	0	0	0	0	0	0	0	0	1
19146	17704.3	9.78156	1	0	Huerce (La)	54	3.98898	0.407407	0.0185185	0.240741	0.148148	0	0	0	1	0.8533	0	0	0	0	0	0	4	0	1	0	1
19147	0	0	1	0	Huérmeces del Cerro	42	3.73767	0.261905	0	0.0714286	0.190476	0	0	0	0	0	0	0	4	0	0	1	0	0	0	0	1
19148	0	0	1	0	Huertahernando	57	4.04305	0.350877	0.0526316	0.157895	0.140351	0	0	0	1	0	0	0	0	0	0	0	0	0	0	0	1
19150	18566.9	9.82914	0	0	Hueva	97	4.57471	0.381443	0	0.257732	0.123711	0	0	0	1	0.764044	0	0	4	0	0	0.666667	0	0	0	0	1
19151	74252.5	11.2152	1	0.746262	Humanes	1644	7.40489	0.492092	0.0748175	0.28528	0.131995	0	1	0	1	0.419191	4	15	25	0.0481928	0.180723	0.301205	4	16	0.0740741	0.296296	1
19152	12085.5	9.39976	1	0.426048	Illana	799	6.68336	0.445557	0.0525657	0.281602	0.111389	0	0	0	0	0.88	4	15	22	0.0606061	0.227273	0.333333	0	0	0	0	1
19153	15000	9.61581	0	0	Iniéstola	22	3.09104	0.318182	0	0.272727	0.0454545	0	0	0	0	0.762873	0	0	0	0	0	0	0	0	0	0	1
19154	40608.8	10.6117	0	0	Inviernas (Las)	61	4.11087	0.311475	0	0.0983607	0.213115	0	0	0	0	0.8475	0	0	0	0	0	0	0	0	0	0	1
19155	0	0	0	0	Irueste	81	4.39445	0.358025	0.037037	0.197531	0.123457	0	0	0	0	0	0	0	4	0	0	1	0	0	0	0	1
19156	95921.6	11.4713	1	0.991323	Jadraque	1393	7.23921	0.475233	0.0595836	0.287868	0.127782	0	1	0	1	0.497218	4	13	22	0.0655738	0.213115	0.360656	4	10	0.181818	0.454545	1
19157	0	0	0	0.707033	Jirueque	49	3.89182	0.306122	0	0.163265	0.142857	0	0	0	0	0	0	0	0	0	0	0	0	0	0	0	1
19159	0	0	0	0	Ledanca	107	4.67283	0.514019	0.00934579	0.308411	0.196262	1	0	0	0	0	0	4	0	0	1	0	0	0	0	0	1
19160	0	0	0	0.634634	Loranca de Tajuña	1318	7.18387	0.457511	0.0675266	0.331563	0.0584219	0	0	0	1	0	4	30	48	0.032	0.24	0.384	0	0	0	0	1
19161	40927.3	10.6196	0	0	Lupiana	286	5.65599	0.461538	0.101399	0.237762	0.122378	0	1	0	1	0.714064	0	4	4	0	0.333333	0.333333	4	4	1	1	1
19162	11905.9	9.38479	0	0	Luzaga	65	4.17439	0.446154	0.0615385	0.230769	0.153846	0	0	0	0	0.801	0	4	0	0	0.666667	0	0	4	0	1	1
19163	0	0	1	0	Luzón	65	4.17439	0.507692	0.0307692	0.246154	0.230769	1	0	0	0	0	0	0	4	0	0	1	0	0	0	0	1
19165	15952.9	9.6774	1	0	Majaelrayo	54	3.98898	0.37037	0.0185185	0.277778	0.0740741	0	0	0	1	0.825768	0	4	0	0	1	0	0	0	0	0	1
19166	107226	11.5827	0	0	Málaga del Fresno	174	5.15906	0.442529	0.0574713	0.195402	0.189655	0	0	0	0	0.340183	0	0	4	0	0	0.444444	0	0	0	0	1
19167	0	0	0	0	Malaguilla	172	5.14749	0.44186	0.0523256	0.290698	0.0988372	0	0	0	0	0	4	4	5	0.210526	0.210526	0.263158	0	4	0	0.307692	1
19168	12500	9.43349	1	0	Mandayona	298	5.69709	0.513423	0.0234899	0.255034	0.234899	1	1	0	1	0.75	0	4	8	0	0.266667	0.533333	0	4	0	0.8	1
19169	1845.4	7.52045	1	0	Mantiel	31	3.43399	0.322581	0	0.193548	0.129032	0	0	0	0	0.693001	0	0	4	0	0	1	0	0	0	0	1
19170	0	0	1	0	Maranchón	225	5.4161	0.466667	0.0355556	0.222222	0.208889	0	0	0	1	0	0	0	4	0	0	0.363636	4	12	0.2	0.6	1
19171	18000	9.79813	0	0.999727	Marchamalo	8030	8.99094	0.498257	0.0924035	0.342341	0.0635118	0	1	0	1	0.62909	17	88	128	0.0472222	0.244444	0.355556	25	1403	0.0106519	0.597784	6
19172	40318.2	10.6046	0	0	Masegoso de Tajuña	57	4.04305	0.421053	0.0175439	0.122807	0.280702	0	0	0	0	0.398296	0	0	0	0	0	0	0	0	0	0	1
19173	20564.9	9.93134	1	0	Matarrubia	64	4.15888	0.34375	0.0625	0.203125	0.078125	0	0	0	0	0.701089	0	4	0	0	1	0	0	0	0	0	1
19174	8857.15	9.08898	0	0	Matillas	103	4.63473	0.456311	0.0291262	0.194175	0.23301	0	0	0	0	0.33686	4	4	4	0.444444	0.444444	0.444444	4	4	1	1	1
19175	0	0	1	0	Mazarete	24	3.17805	0.541667	0	0.166667	0.375	1	0	0	0	0	0	0	4	0	0	1	0	0	0	0	1
19176	20000	9.90349	0	0	Mazuecos	260	5.56068	0.446154	0.0230769	0.246154	0.176923	0	0	0	0	0.411523	0	4	6	0	0.285714	0.428571	0	0	0	0	1
19177	18327	9.81613	1	0	Medranda	68	4.21951	0.5	0.0441176	0.205882	0.25	0	0	0	0	0.82	0	0	0	0	0	0	0	0	0	0	1
19178	12911.7	9.46589	1	0	Megina	36	3.58352	0.361111	0	0.166667	0.194444	0	0	0	0	0.783	0	0	0	0	0	0	0	0	0	0	1
19179	0	0	1	0	Membrillera	117	4.76217	0.418803	0.042735	0.179487	0.196581	0	0	0	0	0	0	0	4	0	0	1	0	4	0	1	1
19181	0	0	1	0	Miedes de Atienza	54	3.98898	0.333333	0	0.111111	0.222222	0	0	0	0	0	0	0	0	0	0	0	0	0	0	0	1
19182	18805.1	9.84188	1	0	Mierla (La)	38	3.63759	0.368421	0	0.210526	0.157895	0	0	0	0	0.7867	0	0	0	0	0	0	0	0	0	0	1
19183	30000	10.309	1	0	Milmarcos	70	4.2485	0.385714	0	0.228571	0.157143	0	0	0	0	0.579039	0	0	0	0	0	0	0	0	0	0	1
19184	30107.8	10.3125	0	0	Millana	110	4.70048	0.4	0.0272727	0.245455	0.127273	0	0	0	1	0.702201	0	0	4	0	0	1	0	5	0	0.714286	1
19185	0	0	1	0	Miñosa (La)	29	3.3673	0.413793	0	0.241379	0.172414	0	0	0	1	0	0	4	4	0	0.8	0.8	0	0	0	0	1
19186	0	0	0	0	Mirabueno	83	4.41884	0.385542	0.0240964	0.180723	0.180723	0	0	0	0	0	0	0	4	0	0	1	0	0	0	0	1
19187	0	0	0	0	Miralrío	64	4.15888	0.453125	0.0625	0.203125	0.1875	0	0	0	1	0	0	0	4	0	0	1	0	4	0	1	1
19188	0	0	1	0	Mochales	38	3.63759	0.5	0	0.0789474	0.421053	0	0	0	0	0	0	0	4	0	0	1	0	4	0	1	1
19189	9000	9.10498	1	0.000509604	Mohernando	167	5.11799	0.437126	0.0538922	0.251497	0.131737	0	0	0	0	0.34435	4	0	0	0.571429	0	0	4	0	1	0	1
19190	526148	13.1733	1	0.967155	Molina de Aragón	3234	8.08148	0.505875	0.0649351	0.318182	0.122758	1	1	0	1	0.386905	4	46	71	0.0216216	0.248649	0.383784	8	27	0.166667	0.5625	1
19191	0	0	0	0	Monasterio	15	2.70805	0.533333	0	0.333333	0.2	1	0	0	1	0	0	0	0	0	0	0	0	0	0	0	1
19192	662268	13.4034	0	0.999878	Mondéjar	2757	7.9219	0.479507	0.0772579	0.299238	0.103011	0	1	0	1	0.371469	8	47	40	0.0536913	0.315436	0.268456	4	4	0.0952381	0.0952381	1
19193	0	0	1	0.0129038	Montarrón	26	3.2581	0.346154	0	0.192308	0.153846	0	0	0	1	0	0	0	0	0	0	0	0	0	0	0	1
19194	100000	11.5129	0	0	Moratilla de los Meleros	107	4.67283	0.429907	0	0.242991	0.186916	0	0	0	0	0.438089	0	4	4	0	0.571429	0.571429	0	0	0	0	1
19195	0	0	0	0	Morenilla	52	3.95124	0.442308	0	0.25	0.192308	0	0	0	0	0	0	4	4	0	1	1	0	0	0	0	1
19196	9036.29	9.109	0	0	Muduex	103	4.63473	0.456311	0.0291262	0.31068	0.116505	0	0	0	1	0.529801	0	4	0	0	1	0	0	0	0	0	1
19197	858	6.7546	1	0	Navas de Jadraque (Las)	33	3.49651	0.333333	0	0.212121	0.121212	0	0	0	0	0.858	0	0	0	0	0	0	0	0	0	0	1
19198	0	0	0	0	Negredo	16	2.77259	0.5	0	0.1875	0.3125	0	0	0	0	0	0	0	0	0	0	0	0	0	0	0	1
19199	0	0	1	0	Ocentejo	16	2.77259	0.3125	0	0.1875	0.125	0	0	0	1	0	0	0	4	0	0	1	0	0	0	0	1
19200	0	0	0	0	Olivar (El)	61	4.11087	0.409836	0.0655738	0.229508	0.114754	0	0	0	1	0	0	0	0	0	0	0	0	0	0	0	1
19201	15000	9.61581	1	0	Olmeda de Cobeta	59	4.07754	0.491525	0.0338983	0.169492	0.288136	0	0	0	0	0.75	0	0	0	0	0	0	0	0	0	0	1
19202	0	0	1	0	Olmeda de Jadraque (La)	14	2.63906	0.214286	0	0.142857	0.0714286	0	0	0	1	0	0	0	0	0	0	0	0	0	0	0	1
19203	0	0	1	0	Ordial (El)	39	3.66356	0.384615	0.0512821	0.128205	0.205128	0	0	0	1	0	0	0	0	0	0	0	0	0	0	0	1
19204	146843	11.8971	1	0	Orea	189	5.24175	0.391534	0.042328	0.232804	0.116402	0	0	0	1	0.323704	0	4	4	0	0.5	0.5	0	0	0	0	1
19208	2145	7.67089	1	0	Pálmaces de Jadraque	42	3.73767	0.333333	0	0.119048	0.214286	0	0	0	1	0.858	0	0	4	0	0	0.666667	4	0	1	0	1
19209	0	0	0	0	Pardos	39	3.66356	0.435897	0	0.179487	0.25641	0	0	0	0	0	0	4	0	0	1	0	0	0	0	0	1
19210	0	0	1	0	Paredes de Sigüenza	23	3.13549	0.565217	0	0.26087	0.304348	1	0	0	1	0	0	4	0	0	1	0	0	0	0	0	1
19211	172064	12.0556	1	0	Pareja	463	6.13773	0.395248	0.0323974	0.207343	0.155508	0	0	0	1	0.395041	0	6	9	0	0.222222	0.333333	0	4	0	1	1
19212	0	0	1	0.97977	Pastrana	850	6.74524	0.503529	0.0494118	0.292941	0.161176	1	0	0	1	0	4	4	12	0.0869565	0.0869565	0.26087	4	4	0.444444	0.444444	1
19213	0	0	0	0	Pedregal (El)	63	4.14313	0.31746	0.015873	0.142857	0.15873	0	0	0	0	0	0	0	0	0	0	0	0	0	0	0	1
19214	11218.7	9.32534	1	0	Peñalén	78	4.35671	0.423077	0	0.192308	0.230769	0	0	0	0	0.769826	0	4	4	0	0.8	0.8	0	0	0	0	1
19215	66562.6	11.1059	0	0	Peñalver	154	5.03695	0.37013	0.038961	0.168831	0.162338	0	0	0	1	0.61157	0	4	4	0	0.666667	0.666667	4	0	1	0	1
19216	0	0	1	0	Peralejos de las Truchas	149	5.00395	0.469799	0.033557	0.281879	0.154362	0	0	0	0	0	0	4	4	0	0.363636	0.363636	0	0	0	0	1
19217	28475	10.2568	0	0	Peralveche	47	3.85015	0.319149	0.0212766	0.106383	0.191489	0	0	0	0	0.472469	0	0	0	0	0	0	0	0	0	0	1
19218	0	0	1	0.000222816	Pinilla de Jadraque	52	3.95124	0.365385	0.0192308	0.230769	0.115385	0	0	0	0	0	0	4	4	0	0.8	0.8	0	0	0	0	1
19219	4626.78	8.43962	1	0	Pinilla de Molina	12	2.48491	0.166667	0	0.0833333	0.0833333	0	0	0	1	0.317377	0	0	0	0	0	0	0	0	0	0	1
19220	21069.8	9.9556	0	0.826844	Pioz	5013	8.51979	0.479553	0.105725	0.339517	0.0343108	0	1	0	1	0.366246	9	99	97	0.029316	0.322476	0.315961	5	4	0.294118	0.235294	6
19221	13354.1	9.49958	1	0	Piqueras	42	3.73767	0.285714	0.047619	0.166667	0.0714286	0	0	0	0	0.81	0	0	4	0	0	1	0	0	0	0	1
19222	0	0	0	0	Pobo de Dueñas (El)	101	4.61512	0.485149	0.049505	0.227723	0.207921	0	0	0	0	0	0	0	0	0	0	0	0	4	0	1	1
19223	15000	9.61581	1	0	Poveda de la Sierra	116	4.75359	0.465517	0.0172414	0.344828	0.103448	0	0	0	0	0.593314	0	0	4	0	0	1	0	4	0	1	1
19224	0	0	0	0	Pozo de Almoguera	110	4.70048	0.390909	0.00909091	0.190909	0.190909	0	0	0	0	0	0	0	0	0	0	0	0	0	0	0	1
19225	40000	10.5966	0	0.758732	Pozo de Guadalajara	1555	7.34923	0.461736	0.0836013	0.334405	0.0437299	0	1	0	1	0.444255	4	32	28	0.0454545	0.363636	0.318182	4	4	0.5	0.5	6
19226	16601	9.71722	1	0	Prádena de Atienza	41	3.71357	0.317073	0.0487805	0.195122	0.0731707	0	0	0	0	0.7875	0	0	4	0	0	0.666667	0	0	0	0	1
19227	43034.6	10.6698	1	0	Prados Redondos	54	3.98898	0.277778	0	0.185185	0.0925926	0	0	0	0	0.717918	0	0	0	0	0	0	0	0	0	0	1
19228	21000	9.95228	1	0	Puebla de Beleña	49	3.89182	0.387755	0.0408163	0.285714	0.0612245	0	0	0	1	0.521583	0	0	4	0	0	1	0	0	0	0	1
19229	54970.4	10.9146	1	0	Puebla de Valles	58	4.06044	0.413793	0	0.155172	0.258621	0	0	0	0	0.386093	0	0	0	0	0	0	0	0	0	0	1
19230	13520.9	9.51199	0	0.0303719	Quer	945	6.85118	0.468783	0.0888889	0.346032	0.0338624	0	1	0	1	0.838821	4	10	19	0.0754717	0.188679	0.358491	6	18	0.0612245	0.183673	6
19231	8196.58	9.01147	0	0	Rebollosa de Jadraque	11	2.3979	0.272727	0	0.181818	0.0909091	0	0	0	1	0.81	0	0	0	0	0	0	0	0	0	0	1
19232	0	0	1	0	Recuenco (El)	61	4.11087	0.409836	0.0327869	0.213115	0.163934	0	0	0	0	0	0	0	4	0	0	1	0	0	0	0	1
19233	20000	9.90349	0	0	Renera	104	4.64439	0.346154	0	0.230769	0.115385	0	0	0	0	0.777413	0	0	4	0	0	0.444444	0	0	0	0	1
19234	0	0	1	0	Retiendas	50	3.91202	0.32	0	0.3	0.02	0	0	0	0	0	0	0	0	0	0	0	0	0	0	0	1
19235	0	0	1	0	Riba de Saelices	115	4.74493	0.4	0.00869565	0.191304	0.2	0	0	0	1	0	0	4	4	0	1	1	0	0	0	0	1
19237	15000	9.61581	0	0	Rillo de Gallo	47	3.85015	0.425532	0.0638298	0.170213	0.191489	0	0	0	0	0.603539	0	0	4	0	0	1	0	0	0	0	1
19238	22649	10.0279	1	0	Riofrío del Llano	58	4.06044	0.37931	0.0344828	0.275862	0.0689655	0	0	0	1	0.8255	0	0	0	0	0	0	0	0	0	0	1
19239	15549.7	9.6518	0	0	Robledillo de Mohernando	148	4.99721	0.412162	0.0540541	0.209459	0.148649	0	0	0	0	0.431709	0	0	5	0	0	0.555556	0	0	0	0	1
19240	12812.7	9.45819	0	0	Robledo de Corpes	42	3.73767	0.5	0.0238095	0.190476	0.285714	0	0	0	0	0.7875	4	0	4	1	0	1	0	0	0	0	1
19241	39585.7	10.5862	0	0	Romanillos de Atienza	32	3.46574	0.3125	0	0.125	0.1875	0	0	0	1	0.81	0	0	0	0	0	0	0	0	0	0	1
19242	17452.7	9.76725	0	0	Romanones	112	4.7185	0.482143	0.0625	0.276786	0.142857	0	0	0	0	0.0847417	0	4	4	0	0.444444	0.444444	4	0	1	0	1
19243	30000	10.309	1	0	Rueda de la Sierra	41	3.71357	0.317073	0.0243902	0.121951	0.170732	0	0	0	0	0.601052	0	0	0	0	0	0	0	0	0	0	1
19244	0	0	1	0	Sacecorbo	99	4.59512	0.414141	0.0808081	0.171717	0.161616	0	0	0	1	0	0	0	0	0	0	0	0	0	0	0	1
19245	102195	11.5346	1	0.60667	Sacedón	1547	7.34407	0.488041	0.051713	0.294118	0.142211	0	1	1	1	0.412446	4	18	30	0.0416667	0.1875	0.3125	4	7	0.222222	0.388889	1
19246	0	0	1	0	Saelices de la Sal	48	3.8712	0.416667	0.0208333	0.1875	0.208333	0	0	0	1	0	0	0	0	0	0	0	0	0	0	0	1
19247	4062.58	8.30957	0	0	Salmerón	128	4.85203	0.421875	0.03125	0.242188	0.148438	0	0	0	1	0.850001	0	0	4	0	0	0.5	0	4	0	1	1
19248	80871.8	11.3006	1	0	San Andrés del Congosto	73	4.29046	0.356164	0	0.205479	0.150685	0	0	0	0	0.8475	0	0	4	0	0	1	0	0	0	0	1
19249	15246	9.63207	0	0	San Andrés del Rey	36	3.58352	0.472222	0	0.166667	0.305556	0	0	0	0	0.5445	0	0	0	0	0	0	0	0	0	0	1
19250	0	0	1	0	Santiuste	14	2.63906	0.285714	0	0.142857	0.142857	0	0	0	0	0	0	0	0	0	0	0	4	0	1	0	1
19251	0	0	0	0	Saúca	52	3.95124	0.403846	0.0192308	0.288462	0.0961538	0	0	0	1	0	0	0	0	0	0	0	0	0	0	0	1
19252	12354.2	9.42175	1	0	Sayatón	63	4.14313	0.460317	0.0793651	0.15873	0.222222	0	0	0	1	0.591385	0	0	4	0	0	0.5	0	0	0	0	1
19254	15000	9.61581	1	0	Selas	40	3.68888	0.5	0	0.225	0.275	0	0	0	0	0.574293	0	0	0	0	0	0	0	4	0	1	1
19255	0	0	0	0	Setiles	86	4.45435	0.430233	0.0116279	0.162791	0.255814	0	0	0	0	0	0	4	4	0	0.666667	0.666667	0	0	0	0	1
19256	0	0	0	0	Sienes	48	3.8712	0.416667	0	0.229167	0.1875	0	0	0	0	0	0	0	4	0	0	1	0	0	0	0	1
19257	854041	13.6577	1	0.571155	Sigüenza	4359	8.38	0.490479	0.0516173	0.291351	0.147511	0	1	0	1	0.494401	5	29	57	0.0289017	0.16763	0.32948	7	66	0.0693069	0.653465	1
19258	0	0	0	0	Solanillos del Extremo	87	4.46591	0.356322	0	0.206897	0.149425	0	0	0	0	0	0	4	4	0	1	1	0	0	0	0	1
19259	0	0	1	0	Somolinos	31	3.43399	0.451613	0	0.258065	0.193548	0	0	0	0	0	0	0	4	0	0	1	0	0	0	0	1
19260	6230.79	8.73726	0	0	Sotillo (El)	35	3.55535	0.514286	0	0.142857	0.371429	1	0	0	0	0.7499	0	0	0	0	0	0	0	0	0	0	1
19261	69249.7	11.1455	0	0	Sotodosos	31	3.43399	0.419355	0	0.16129	0.258065	0	0	0	0	1.46509	0	0	4	0	0	1	0	0	0	0	1
19262	200000	12.2061	1	0	Tamajón	147	4.99043	0.435374	0.00680272	0.163265	0.265306	0	0	0	1	0.581089	0	4	0	0	1	0	0	4	0	1	1
19263	12000	9.39266	0	0	Taragudo	43	3.7612	0.372093	0.0232558	0.255814	0.0930233	0	0	0	0	0.421162	0	0	0	0	0	0	0	0	0	0	1
19264	13927.2	9.5416	1	0	Taravilla	33	3.49651	0.30303	0	0.242424	0.0606061	0	0	0	1	0.809999	0	0	4	0	0	1	0	0	0	0	1
19265	101544	11.5282	1	0	Tartanedo	147	4.99043	0.408163	0	0.176871	0.231293	0	0	0	1	0.491781	0	0	4	0	0	1	0	4	0	1	1
19266	38408.1	10.556	1	0	Tendilla	315	5.75257	0.450794	0.047619	0.288889	0.114286	0	0	0	0	0.338843	4	4	4	0.5	0.5	0.5	0	4	0	1	1
19267	0	0	1	0	Terzaga	20	2.99573	0.4	0.1	0.15	0.15	0	0	0	0	0	0	0	0	0	0	0	0	0	0	0	1
19268	23271.7	10.055	1	0	Tierzo	36	3.58352	0.416667	0.0555556	0.25	0.111111	0	0	0	1	0.546227	0	4	4	0	1	1	0	0	0	0	1
19269	61812.8	11.0319	1	0	Toba (La)	76	4.33073	0.342105	0	0.118421	0.223684	0	0	0	1	0.8475	0	0	0	0	0	0	0	0	0	0	1
19270	0	0	1	0	Tordelrábano	12	2.48491	0.333333	0	0.25	0.0833333	0	0	0	0	0	0	0	0	0	0	0	0	0	0	0	1
19271	13475.4	9.50862	0	0	Tordellego	49	3.89182	0.428571	0.0204082	0.204082	0.204082	0	0	0	1	0.81	0	4	0	0	1	0	0	0	0	0	1
19272	15000	9.61581	1	0	Tordesilos	93	4.5326	0.408602	0.0322581	0.247312	0.129032	0	0	0	1	0.394548	0	0	4	0	0	1	0	0	0	0	1
19274	55851.8	10.9305	0	0.965519	Torija	1663	7.41638	0.481058	0.0920024	0.328924	0.0601323	0	1	0	1	0.393829	4	25	18	0.0555556	0.347222	0.25	9	23	0.0588235	0.150327	6
19277	20812	9.94328	1	0	Torrecuadrada de Molina	21	3.04452	0.333333	0.0952381	0.142857	0.0952381	0	0	0	0	0.768847	0	0	0	0	0	0	0	0	0	0	1
19278	0	0	1	0	Torrecuadradilla	28	3.3322	0.392857	0	0.142857	0.25	0	0	0	0	0	0	0	0	0	0	0	0	0	0	0	1
19279	12000	9.39266	0	0	Torre del Burgo	474	6.16121	0.424051	0.0253165	0.367089	0.0316456	0	0	0	1	0.411915	4	4	4	0.5	0.5	0.5	0	0	0	0	1
19280	27500.4	10.222	0	0.521042	Torrejón del Rey	6002	8.69985	0.481173	0.0888037	0.341719	0.0506498	0	1	1	1	0.451147	6	81	121	0.0185185	0.25	0.373457	5	0	0.277778	0	6
19281	0	0	0	0	Torremocha de Jadraque	18	2.89037	0.444444	0.0555556	0.277778	0.111111	0	0	0	0	0	0	0	0	0	0	0	0	0	0	0	1
19282	72670.5	11.1937	1	0	Torremocha del Campo	183	5.20949	0.420765	0.0273224	0.213115	0.180328	0	0	0	1	0.123912	0	0	5	0	0	0.714286	0	0	0	0	1
19283	23653.4	10.0713	1	0	Torremocha del Pinar	40	3.68888	0.55	0.025	0.275	0.25	1	0	0	0	0.699909	0	0	4	0	0	1	0	0	0	0	1
19284	6584.69	8.7925	1	0	Torremochuela	8	2.07944	0.25	0	0.125	0.125	0	0	0	0	0.747	0	0	0	0	0	0	0	0	0	0	1
19285	0	0	1	0	Torrubia	23	3.13549	0.347826	0	0.0869565	0.26087	0	0	0	1	0	0	0	0	0	0	0	0	0	0	0	1
19286	23527.3	10.0659	1	0	Tórtola de Henares	1331	7.19369	0.464313	0.095417	0.309542	0.0593539	0	1	0	0	0.60452	0	17	19	0	0.269841	0.301587	0	4	0	1	6
19287	15000	9.61581	0	0	Tortuera	181	5.1985	0.480663	0.0497238	0.292818	0.138122	0	0	0	0	0.673805	0	0	0	0	0	0	4	0	1	0	1
19288	0	0	1	0	Tortuero	18	2.89037	0.277778	0	0.111111	0.166667	0	0	0	1	0	0	0	0	0	0	0	0	0	0	0	1
19289	13310.6	9.49631	1	0	Traíd	24	3.17805	0.375	0.0416667	0.125	0.208333	0	0	0	1	0.783	0	0	0	0	0	0	0	0	0	0	1
19290	17932.2	9.79435	0	0.570118	Trijueque	1478	7.29845	0.462788	0.0615697	0.332882	0.0683356	0	1	0	0	0.742188	4	28	42	0.0310078	0.217054	0.325581	4	4	1	1	6
19291	132808	11.7967	1	0	Trillo	1401	7.24494	0.477516	0.0371163	0.303355	0.137045	0	0	0	1	0.601296	0	6	15	0	0.15	0.375	6	5	0.25	0.208333	1
19293	10875	9.29422	0	0.989113	Uceda	3048	8.02224	0.487205	0.0833333	0.333661	0.07021	0	1	0	1	0.499311	4	23	65	0.0251572	0.144654	0.408805	4	4	1	1	1
19294	0	0	1	0	Ujados	28	3.3322	0.535714	0.0357143	0.214286	0.285714	1	0	0	0	0	0	4	0	0	1	0	0	0	0	0	1
19296	2365.55	7.76877	0	0	Utande	34	3.52636	0.235294	0	0.117647	0.117647	0	0	0	0	0.85	0	0	0	0	0	0	0	0	0	0	1
19297	12714.5	9.4505	0	0	Valdarachas	47	3.85015	0.489362	0.0212766	0.382979	0.0851064	0	0	0	0	0.723791	0	4	4	0	0.8	0.8	0	0	0	0	1
19298	21000	9.95228	0	0	Valdearenas	76	4.33073	0.355263	0.0131579	0.25	0.0921053	0	0	0	1	0.706987	0	4	4	0	0.571429	0.571429	0	0	0	0	1
19299	12000	9.39266	0	0	Valdeavellano	108	4.68213	0.462963	0.0555556	0.25	0.157407	0	0	0	0	0.407487	0	4	4	0	0.666667	0.666667	0	0	0	0	1
19300	18000	9.79813	0	0.00280587	Valdeaveruelo	1177	7.07072	0.480034	0.0696686	0.345794	0.0645709	0	0	0	0	0.277207	4	14	22	0.0677966	0.237288	0.372881	4	4	1	1	6
19301	0	0	0	0	Valdeconcha	39	3.66356	0.435897	0.0512821	0.307692	0.0769231	0	0	0	0	0	0	0	4	0	0	1	0	0	0	0	1
19302	12000	9.39266	0	0	Valdegrudas	53	3.97029	0.358491	0.0188679	0.113208	0.226415	0	0	0	1	0.667174	0	0	0	0	0	0	0	0	0	0	1
19303	0	0	1	0	Valdelcubo	38	3.63759	0.342105	0	0.157895	0.184211	0	0	0	1	0	0	0	0	0	0	0	0	0	0	0	1
19304	21000	9.95228	0	0	Valdenuño Fernández	308	5.7301	0.454545	0.0454545	0.318182	0.0909091	0	0	0	1	0.408911	0	5	10	0	0.151515	0.30303	4	0	1	0	1
19305	0	0	1	0.0502329	Valdepeñas de la Sierra	147	4.99043	0.394558	0.0136054	0.183673	0.197279	0	0	0	1	0	0	0	0	0	0	0	0	0	0	0	1
19306	42518.1	10.6577	1	0	Valderrebollo	23	3.13549	0.478261	0	0.217391	0.26087	0	0	0	0	0.658687	0	0	4	0	0	1	0	0	0	0	1
19307	0	0	1	0	Valdesotos	27	3.29584	0.37037	0.037037	0.185185	0.148148	0	0	0	0	0	0	0	0	0	0	0	0	0	0	0	1
19308	0	0	1	0	Valfermoso de Tajuña	74	4.30407	0.391892	0.0540541	0.175676	0.162162	0	0	0	1	0	0	0	0	0	0	0	0	0	0	0	1
19309	12021.1	9.39442	1	0	Valhermoso	26	3.2581	0.384615	0	0.230769	0.153846	0	0	0	1	0.81	0	0	0	0	0	0	0	0	0	0	1
19310	0	0	1	0	Valtablado del Río	8	2.07944	0.375	0	0	0.375	0	0	0	0	0	0	0	0	0	0	0	0	0	0	0	1
19311	0	0	1	0	Valverde de los Arroyos	88	4.47734	0.443182	0	0.227273	0.215909	0	0	0	0	0	0	0	4	0	0	1	0	0	0	0	1
19314	0	0	1	0	Viana de Jadraque	41	3.71357	0.317073	0	0.121951	0.195122	0	0	0	1	0	0	0	0	0	0	0	0	0	0	0	1
19317	0	0	1	0	Villanueva de Alcorón	135	4.90527	0.414815	0	0.2	0.214815	0	0	0	0	0	0	4	0	0	0.5	0	0	0	0	0	1
19318	0	0	0	0	Villanueva de Argecilla	39	3.66356	0.461538	0.128205	0.25641	0.0769231	0	0	0	0	0	0	4	0	0	1	0	0	0	0	0	1
19319	16215	9.69369	0	0.906449	Villanueva de la Torre	6559	8.78859	0.491843	0.0794328	0.365757	0.0466535	0	1	0	1	0.670042	18	64	149	0.0515759	0.183381	0.426934	4	10	0.137931	0.344828	6
19321	0	0	1	0	Villares de Jadraque	49	3.89182	0.367347	0.0204082	0.102041	0.244898	0	0	0	0	0	0	4	0	0	1	0	0	0	0	0	1
19322	0	0	0	0	Villaseca de Henares	26	3.2581	0.461538	0	0.192308	0.269231	0	0	0	1	0	0	0	0	0	0	0	0	0	0	0	1
19323	0	0	1	0	Villaseca de Uceda	45	3.80666	0.466667	0	0.355556	0.111111	0	0	0	1	0	0	0	0	0	0	0	0	0	0	0	1
19324	12835.1	9.45994	1	0	Villel de Mesa	173	5.15329	0.410405	0.017341	0.208092	0.184971	0	0	0	0	0.792	0	4	4	0	1	1	0	0	0	0	1
19325	162068	11.9958	0	0	Viñuelas	182	5.20401	0.5	0.0164835	0.258242	0.225275	0	0	0	1	0.752408	0	4	6	0	0.5	0.75	0	4	0	1	1
19326	0	0	0	0	Yebes	4936	8.50431	0.487034	0.105754	0.348865	0.0324149	0	1	1	1	0	13	87	78	0.0528455	0.353659	0.317073	5	10	0.166667	0.333333	6
19327	100541	11.5183	1	0.000817209	Yebra	451	6.11147	0.465632	0.0332594	0.272727	0.159645	0	0	0	1	0.398265	4	5	14	0.148148	0.185185	0.518519	0	4	0	1	1
19329	4181.31	8.33838	0	0	Yélamos de Abajo	65	4.17439	0.507692	0.0615385	0.215385	0.230769	1	0	0	0	0.696891	0	0	4	0	0	1	0	0	0	0	1
19330	21724.2	9.98618	0	0	Yélamos de Arriba	82	4.40672	0.402439	0.0487805	0.207317	0.146341	0	0	0	0	0.354209	0	0	0	0	0	0	0	0	0	0	1
19331	667621	13.4115	1	0.901356	Yunquera de Henares	4329	8.37309	0.491106	0.0907831	0.331947	0.0683761	0	1	0	1	0.673921	10	58	74	0.0452489	0.262443	0.334842	5	70	0.0367647	0.514706	6
19332	15000	9.61581	1	0	Yunta (La)	90	4.49981	0.411111	0.0222222	0.2	0.188889	0	0	0	0	0.58136	4	4	4	0.8	0.8	0.8	0	4	0	0.8	1
19333	12601.1	9.44154	1	0	Zaorejas	101	4.61512	0.336634	0	0.138614	0.19802	0	0	0	1	0.774	0	4	4	0	0.571429	0.571429	0	0	0	0	1
19334	0	0	1	0	Zarzuela de Jadraque	54	3.98898	0.314815	0	0.0925926	0.222222	0	0	0	1	0	4	0	0	1	0	0	0	0	0	0	1
19335	18366.5	9.81828	1	0.0478997	Zorita de los Canes	60	4.09434	0.433333	0	0.25	0.183333	0	0	0	0	0.542002	0	0	4	0	0	1	0	0	0	0	1
19901	0	0	1	0	Semillas	35	3.55535	0.371429	0	0.0571429	0.314286	0	0	0	1	0	0	0	0	0	0	0	0	0	0	0	1
45001	32553.6	10.3906	1	0.951441	Ajofrín	2290	7.73631	0.49476	0.0781659	0.29476	0.121834	0	1	0	1	0.777777	4	37	62	0.0258065	0.23871	0.4	4	10	0.121212	0.30303	4
45002	0	0	0	0.00029204	Alameda de la Sagra	3908	8.27078	0.479017	0.0852098	0.309365	0.0844422	0	1	0	1	0	6	107	121	0.0175953	0.313783	0.354839	8	4	0.242424	0.121212	5
45003	14781	9.6011	1	0.00179328	Albarreal de Tajo	692	6.53959	0.476879	0.050578	0.303468	0.122832	0	1	0	1	0.315661	4	11	11	0.097561	0.268293	0.268293	4	4	0.571429	0.571429	5
45004	51867.1	10.8564	0	0	Alcabón	743	6.6107	0.496635	0.0632571	0.312248	0.121131	0	1	0	1	0.219865	4	15	40	0.0444444	0.166667	0.444444	4	4	1	1	5
45005	77294.4	11.2554	0	0	Alcañizo	277	5.62402	0.512635	0.0397112	0.288809	0.184116	1	0	0	1	0.541399	0	9	7	0	0.375	0.291667	0	4	0	1	3
45006	57996.8	10.9681	1	0	Alcaudete de la Jara	1614	7.38647	0.494424	0.051425	0.273234	0.169765	0	1	0	1	0.81398	7	46	88	0.0285714	0.187755	0.359184	0	4	0	0.8	1
45007	180286	12.1023	1	0.0201539	Alcolea de Tajo	824	6.71417	0.496359	0.0521845	0.302184	0.14199	0	0	0	1	0.327032	4	23	39	0.0392157	0.22549	0.382353	0	4	0	0.235294	3
45008	12576.7	9.4396	1	0.999076	Aldea en Cabo	187	5.23111	0.486631	0.0213904	0.278075	0.187166	0	0	0	1	0.89	4	0	4	0.333333	0	0.333333	4	0	1	0	2
45009	0	0	1	0.979082	Aldeanueva de Barbarroya	482	6.17794	0.481328	0.0394191	0.23029	0.211618	0	0	0	1	0	0	10	14	0	0.222222	0.311111	0	4	0	0.571429	1
45010	45135.3	10.7174	0	0	Aldeanueva de San Bartolomé	416	6.03069	0.497596	0.0264423	0.173077	0.298077	0	0	0	1	0.799037	4	4	7	0.173913	0.173913	0.304348	0	4	0	1	1
45011	0	0	1	0	Almendral de la Cañada	322	5.77455	0.484472	0.0248447	0.263975	0.195652	0	0	0	1	0	4	4	14	0.129032	0.129032	0.451613	0	0	0	0	2
45012	27045	10.2053	0	0	Almonacid de Toledo	885	6.78559	0.510734	0.0542373	0.305085	0.151412	1	1	0	1	0.891016	4	14	27	0.0666667	0.233333	0.45	4	4	0.285714	0.285714	4
45013	23208.9	10.0523	1	0.995611	Almorox	2317	7.74803	0.478636	0.0630125	0.288735	0.126888	0	1	0	1	0.528301	5	36	60	0.0276243	0.198895	0.331492	0	16	0	0.64	5
45014	95548.8	11.4674	0	0.779529	Añover de Tajo	5225	8.56121	0.494163	0.067177	0.317895	0.109091	0	1	0	1	0	8	79	156	0.0220386	0.217631	0.429752	4	8	0.181818	0.363636	5
45015	15249	9.63227	0	0.0161225	Arcicóllar	1004	6.91175	0.503984	0.0727092	0.329681	0.101594	1	1	0	1	0.87	4	17	38	0.047619	0.202381	0.452381	0	4	0	1	5
45016	0	0	0	0.982402	Argés	6829	8.82893	0.500513	0.102358	0.340606	0.0575487	1	1	0	1	0	11	88	120	0.0321637	0.25731	0.350877	7	4	0.35	0.2	6
45017	70371.5	11.1615	0	0.0415289	Azután	296	5.69036	0.513514	0.0304054	0.283784	0.199324	1	0	0	1	0.561838	0	14	17	0	0.325581	0.395349	4	0	1	0	3
45018	14904.3	9.60941	0	0.880361	Barcience	1003	6.91075	0.459621	0.10668	0.311067	0.0418744	0	1	0	1	0.89	4	32	29	0.039604	0.316832	0.287129	4	4	0.25	0.25	5
45019	0	0	0	0.981156	Bargas	10807	9.28795	0.497548	0.0798556	0.331914	0.0857777	0	1	0	1	0	16	165	196	0.0253968	0.261905	0.311111	9	48	0.0782609	0.417391	6
45020	251563	12.4354	1	0	Belvís de la Jara	1497	7.31122	0.486306	0.0541082	0.261857	0.170341	0	1	1	1	0.573592	4	18	45	0.034188	0.153846	0.384615	4	28	0.102564	0.717949	1
45021	0	0	1	0.936991	Borox	4032	8.30202	0.471974	0.0751488	0.320437	0.0763889	0	1	0	1	0	7	77	96	0.0245614	0.270175	0.336842	5	189	0.0151976	0.574468	6
45022	0	0	1	0.0437379	Buenaventura	403	5.99894	0.496278	0.0148883	0.272953	0.208437	0	0	0	1	0	4	4	13	0.0952381	0.0952381	0.309524	0	4	0	1	2
45023	0	0	1	0.502298	Burguillos de Toledo	3473	8.15277	0.478549	0.0955946	0.331702	0.0512525	0	1	0	1	0	9	47	62	0.0481283	0.251337	0.331551	4	15	0.097561	0.365854	6
45024	17176	9.75127	1	0.00284306	Burujón	1304	7.17319	0.489264	0.0644172	0.302914	0.121933	0	1	0	1	0.541607	4	24	28	0.0519481	0.311688	0.363636	4	0	1	0	5
45025	0	0	0	0	Cabañas de la Sagra	2041	7.6212	0.484566	0.0744733	0.33023	0.0798628	0	1	0	1	0	6	31	78	0.0314136	0.162304	0.408377	11	4	0.423077	0.153846	5
45026	84085.4	11.3396	1	0	Cabañas de Yepes	304	5.71703	0.483553	0.0657895	0.276316	0.141447	0	1	0	1	0.540899	0	4	12	0	0.166667	0.5	0	4	0	1	5
45027	0	0	0	0	Cabezamesada	319	5.76519	0.454545	0.031348	0.213166	0.210031	0	1	0	0	0	0	4	10	0	0.153846	0.384615	4	4	0.571429	0.571429	3
45028	268795	12.5017	1	0	Calera y Chozas	4716	8.45872	0.492791	0.0716709	0.312129	0.108991	0	1	0	1	0.772248	20	127	201	0.0414079	0.26294	0.416149	4	31	0.0769231	0.596154	6
45029	44982.5	10.714	0	0	Caleruela	202	5.30827	0.50495	0.00990099	0.227723	0.267327	1	0	0	1	0.879181	0	4	5	0	0.333333	0.416667	4	0	1	0	3
45030	45739.6	10.7307	1	0.11594	Calzada de Oropesa	510	6.23441	0.45098	0.0235294	0.270588	0.156863	0	0	0	1	0.756026	4	4	23	0.0784314	0.0784314	0.45098	4	4	0.5	0.5	3
45031	17981	9.79707	0	0.972356	Camarena	4283	8.36241	0.48354	0.0807845	0.321037	0.0817184	0	1	0	1	0.84	13	82	107	0.0420712	0.265372	0.346278	4	25	0.0187793	0.117371	5
45032	13858	9.53661	0	0	Camarenilla	610	6.41346	0.495082	0.0655738	0.277049	0.152459	0	0	0	1	0.845406	4	14	15	0.08	0.28	0.3	4	0	1	0	5
45033	0	0	1	0	Campillo de la Jara (El)	336	5.81711	0.455357	0.0446429	0.22619	0.184524	0	0	0	1	0	0	6	5	0	0.272727	0.227273	0	4	0	1	1
45034	141525	11.8602	1	0	Camuñas	1742	7.46279	0.48163	0.065442	0.27899	0.137199	0	1	0	1	0.520309	4	34	42	0.037037	0.314815	0.388889	7	8	0.114754	0.131148	4
45035	0	0	1	0.000671446	Cardiel de los Montes	394	5.97635	0.449239	0.0456853	0.251269	0.152284	0	0	0	0	0	0	8	12	0	0.242424	0.363636	0	4	0	1	2
45036	27574.8	10.2247	0	0.000361548	Carmena	777	6.65544	0.492921	0.0553411	0.285714	0.151866	0	1	0	1	0.297147	4	15	22	0.0547945	0.205479	0.30137	0	6	0	0.857143	5
45037	37544	10.5333	1	0.980924	Carpio de Tajo (El)	1826	7.50988	0.499452	0.0438116	0.277656	0.177985	0	1	0	1	0.285881	4	31	46	0.0322581	0.25	0.370968	4	10	0.133333	0.333333	5
45038	0	0	0	0.847647	Carranque	5155	8.54772	0.479728	0.0806984	0.34452	0.0545102	0	1	0	1	0	8	81	132	0.024024	0.243243	0.396396	5	5	0.185185	0.185185	6
45039	13147	9.48395	0	0	Carriches	276	5.6204	0.503623	0.0869565	0.26087	0.155797	1	1	0	1	0.78252	0	4	9	0	0.181818	0.409091	4	0	1	0	5
45040	19290.3	9.86736	1	6.25236e-05	Casar de Escalona (El)	1891	7.54486	0.463247	0.061872	0.293496	0.107879	0	1	0	1	0.86	4	58	59	0.0188679	0.273585	0.278302	4	0	0.5	0	5
45041	0	0	0	0.521228	Casarrubios del Monte	6441	8.77044	0.4771	0.0835274	0.325415	0.0681571	0	1	0	1	0	8	103	111	0.0214477	0.276139	0.297587	26	21	0.191176	0.154412	5
45042	0	0	1	1	Casasbuenas	188	5.23644	0.489362	0.0212766	0.255319	0.212766	0	0	0	1	0	0	4	4	0	0.4	0.4	0	0	0	0	4
45043	476985	13.0752	1	0	Castillo de Bayuela	895	6.79682	0.503911	0.0312849	0.296089	0.176536	1	0	0	1	0.975371	0	9	27	0	0.147541	0.442623	0	4	0	0.8	2
45045	227558	12.3352	0	0.130884	Cazalegas	1927	7.56372	0.482097	0.0757654	0.29424	0.112091	0	1	0	1	0.318551	13	58	81	0.0560345	0.25	0.349138	4	5	0.129032	0.16129	6
45046	0	0	1	0	Cebolla	3201	8.07122	0.502968	0.0699781	0.320837	0.112152	1	1	0	1	0	14	118	170	0.0305011	0.257081	0.37037	6	6	0.25	0.25	5
45047	0	0	0	0.0354865	Cedillo del Condado	4101	8.31899	0.483541	0.0992441	0.325287	0.05901	0	1	0	1	0	14	89	103	0.04375	0.278125	0.321875	4	6	0.266667	0.4	5
45048	0	0	0	0.00260983	Cerralbos (Los)	397	5.98394	0.458438	0.02267	0.241814	0.193955	0	0	0	0	0	4	10	13	0.129032	0.322581	0.419355	0	4	0	1	5
45049	14976.6	9.61424	1	0.013431	Cervera de los Montes	508	6.23048	0.484252	0.0669291	0.295276	0.122047	0	0	0	1	0.814682	0	5	20	0	0.102041	0.408163	4	0	1	0	2
45050	72992.7	11.1981	0	0.998653	Ciruelos	630	6.44572	0.460317	0.068254	0.314286	0.0777778	0	1	0	0	0.87031	4	14	17	0.0714286	0.25	0.303571	0	0	0	0	5
45051	0	0	0	1	Cobeja	2482	7.81682	0.479452	0.0705077	0.328767	0.0801773	0	1	0	1	0	7	37	51	0.047619	0.251701	0.346939	0	4	0	0.333333	5
45052	46290.6	10.7427	0	0.976595	Cobisa	4427	8.39548	0.500339	0.0758979	0.371809	0.0526316	1	1	0	1	0.724112	7	33	86	0.0358974	0.169231	0.441026	4	9	0.181818	0.409091	6
45053	17724.6	9.78271	1	0.93635	Consuegra	9886	9.19887	0.492414	0.0657495	0.305483	0.121181	0	1	0	1	0.252405	18	126	288	0.0294599	0.206219	0.471358	19	66	0.109827	0.381503	4
45054	163792	12.0064	1	0.417012	Corral de Almaguer	4827	8.48198	0.482701	0.0600787	0.288999	0.133623	0	1	0	1	0.487892	15	110	161	0.0374065	0.274314	0.401496	6	13	0.0645161	0.139785	4
45055	27842.5	10.2343	0	0	Cuerva	1248	7.1293	0.479968	0.0512821	0.291667	0.137019	0	1	0	1	0.85	4	19	26	0.0540541	0.256757	0.351351	4	5	0.444444	0.555556	4
45056	57490.7	10.9594	0	0.963255	Chozas de Canales	4523	8.41693	0.486624	0.106566	0.323237	0.0568207	0	1	0	1	0.128002	20	125	150	0.041841	0.261506	0.313808	4	4	0.333333	0.333333	5
45057	2717.06	7.90731	0	0.655673	Chueca	249	5.51745	0.502008	0.0763052	0.293173	0.13253	1	0	0	0	0.109783	0	4	14	0	0.173913	0.608696	0	4	0	1	4
45058	13788.6	9.5316	0	0	Domingo Pérez	306	5.72359	0.490196	0.0196078	0.277778	0.19281	0	0	0	0	0.869985	0	11	13	0	0.314286	0.371429	0	0	0	0	5
45059	291591	12.5831	1	0	Dosbarrios	2273	7.72886	0.486582	0.0633524	0.311043	0.112187	0	1	0	1	0.311007	4	49	60	0.0264901	0.324503	0.397351	4	32	0.0701754	0.561404	3
45060	12878	9.46327	0	0	Erustes	206	5.32788	0.470874	0.0728155	0.247573	0.150485	0	0	0	1	0.87	4	5	4	0.222222	0.277778	0.222222	4	0	1	0	5
45061	24089.9	10.0895	1	0.992527	Escalona	3573	8.18116	0.483347	0.054576	0.315981	0.11279	0	1	0	1	0.86	9	88	153	0.0224439	0.219451	0.381546	7	12	0.304348	0.521739	5
45062	99237.1	11.5053	0	0.000535853	Escalonilla	1440	7.2724	0.505556	0.0652778	0.317361	0.122917	1	1	0	1	0.194775	4	35	38	0.0353982	0.309735	0.336283	0	4	0	0.8	5
45063	4061.76	8.30937	1	0	Espinoso del Rey	437	6.07993	0.416476	0.02746	0.180778	0.208238	0	0	0	1	0.595214	4	9	10	0.108108	0.243243	0.27027	4	4	0.5	0.5	1
45064	0	0	0	0.750738	Esquivias	5740	8.65521	0.493031	0.0780488	0.330314	0.084669	0	1	0	1	0	14	99	150	0.0364583	0.257812	0.390625	11	12	0.189655	0.206897	6
45065	0	0	1	0.941463	Estrella (La)	194	5.26786	0.448454	0.00515464	0.0927835	0.350515	0	0	0	1	0	4	4	4	0.266667	0.266667	0.266667	0	0	0	0	1
45066	163343	12.0036	0	0.993776	Fuensalida	12004	9.393	0.496501	0.0886371	0.33014	0.0777241	0	1	0	1	0.213067	29	232	347	0.0319383	0.255507	0.382159	12	32	0.121212	0.323232	5
45067	66762.3	11.1089	0	0	Gálvez	2986	8.00169	0.497991	0.0659745	0.298727	0.133289	0	1	0	1	0.543494	4	34	89	0.0212766	0.180851	0.473404	9	7	0.272727	0.212121	4
45068	53472.8	10.8869	1	0	Garciotum	216	5.37528	0.513889	0.101852	0.268519	0.143519	1	0	0	1	0.834543	4	4	4	0.333333	0.333333	0.333333	4	0	1	0	2
45069	60324.5	11.0075	0	0.984511	Gerindote	2518	7.83122	0.500397	0.0714853	0.343924	0.0849881	1	1	0	1	0.206246	7	58	101	0.0299145	0.247863	0.431624	4	7	0.210526	0.368421	5
45070	31896.4	10.3702	0	0.888791	Guadamur	1774	7.48099	0.5	0.0620068	0.318489	0.119504	0	0	0	1	0.798504	4	21	42	0.0380952	0.2	0.4	4	9	0.16	0.36	4
45071	121133	11.7046	1	0	Guardia (La)	2163	7.67925	0.491447	0.0624133	0.296348	0.132686	0	1	0	1	0.51418	9	41	110	0.038961	0.177489	0.47619	8	37	0.117647	0.544118	3
45072	212154	12.2651	1	0.00201234	Herencias (Las)	768	6.64379	0.466146	0.0403646	0.270833	0.154948	0	1	0	1	0.75371	4	14	21	0.0555556	0.194444	0.291667	4	13	0.137931	0.448276	1
45073	58791.6	10.9818	1	0.715468	Herreruela de Oropesa	304	5.71703	0.473684	0.0230263	0.236842	0.213816	0	0	0	1	0.726431	4	4	5	0.25	0.25	0.3125	0	0	0	0	3
45074	138079	11.8356	1	0	Hinojosa de San Vicente	394	5.97635	0.449239	0.0329949	0.22335	0.192893	0	0	0	0	0.769155	0	4	11	0	0.114286	0.314286	0	0	0	0	2
45075	0	0	1	0	Hontanar	146	4.98361	0.40411	0.00684932	0.232877	0.164384	0	0	0	0	0	0	4	4	0	0.8	0.8	0	0	0	0	2
45076	115295	11.6552	1	0.024965	Hormigos	881	6.78106	0.444949	0.0522134	0.282633	0.110102	0	1	0	1	0.223667	7	26	25	0.0619469	0.230088	0.221239	4	0	1	0	5
45077	34688.9	10.4542	0	0.784477	Huecas	810	6.69703	0.48642	0.0641975	0.309877	0.112346	0	1	0	1	0.25379	0	23	31	0	0.328571	0.442857	4	4	0.133333	0.133333	5
45078	39535.6	10.585	1	0	Huerta de Valdecarábanos	1726	7.45356	0.494786	0.0689455	0.29606	0.12978	0	1	0	1	0.675564	4	23	59	0.0325203	0.186992	0.479675	4	4	0.444444	0.444444	5
45079	255072	12.4493	1	0	Iglesuela del Tiétar (La)	471	6.15486	0.460722	0.044586	0.261146	0.154989	0	0	0	1	0.382709	4	8	13	0.0816327	0.163265	0.265306	4	4	0.571429	0.571429	2
45080	0	0	0	0	Illán de Vacas	3	1.09861	0	0	0	0	0	0	0	0	0	0	0	0	0	0	0	0	0	0	0	5
45081	0	0	0	0.623865	Illescas	30553	10.3272	0.498053	0.102118	0.340621	0.0553137	0	1	0	1	0	63	475	666	0.0343324	0.258856	0.362943	126	246	0.133616	0.26087	6
45082	303034	12.6216	1	0.968927	Lagartera	1292	7.16395	0.505418	0.0386997	0.258514	0.208204	1	1	0	1	0.551828	4	11	29	0.0555556	0.152778	0.402778	5	4	0.208333	0.166667	3
45083	25187.5	10.1341	1	0.0233039	Layos	845	6.73934	0.493491	0.0769231	0.331361	0.0852071	0	1	0	1	0.891125	4	5	21	0.102564	0.128205	0.538462	5	30	0.0462963	0.277778	6
45084	39997.7	10.5966	1	0.975144	Lillo	2543	7.8411	0.478569	0.0471884	0.299646	0.131734	0	1	0	1	0.87	6	66	113	0.0241935	0.266129	0.455645	4	12	0.111111	0.333333	4
45085	59713.2	10.9973	0	0.0147445	Lominchar	2510	7.82804	0.475299	0.0880478	0.319522	0.0677291	0	1	0	1	0.160719	6	51	76	0.0291262	0.247573	0.368932	4	4	0.333333	0.333333	5
45086	0	0	0	0.465002	Lucillos	571	6.34739	0.474606	0.056042	0.28021	0.138354	0	0	0	1	0	0	13	27	0	0.216667	0.45	0	5	0	0.416667	5
45087	145417	11.8874	1	0.663713	Madridejos	10202	9.23034	0.502156	0.063615	0.319741	0.1188	1	1	0	1	0.358117	14	150	279	0.0228013	0.2443	0.454397	23	36	0.117347	0.183673	4
45088	0	0	0	0.0455198	Magán	3875	8.2623	0.494968	0.0980645	0.340645	0.0562581	0	1	0	1	0	10	84	89	0.0332226	0.27907	0.295681	4	4	0.363636	0.363636	6
45089	0	0	1	0	Malpica de Tajo	1688	7.4313	0.487559	0.0503555	0.287322	0.149882	0	1	0	1	0	5	34	68	0.0292398	0.19883	0.397661	0	20	0	0.47619	5
45090	0	0	0	0	Manzaneque	382	5.94542	0.515707	0.0287958	0.329843	0.157068	1	1	0	1	0	4	8	16	0.117647	0.235294	0.470588	4	4	0.210526	0.210526	4
45091	95231.4	11.4641	0	0.248127	Maqueda	459	6.12905	0.492375	0.037037	0.283224	0.172113	0	1	0	1	0.215549	4	8	20	0.0869565	0.173913	0.434783	0	4	0	0.571429	5
45092	0	0	1	0	Marjaliza	253	5.53339	0.486166	0.0197628	0.217391	0.249012	0	1	0	1	0	4	4	4	0.307692	0.307692	0.307692	4	0	0.8	0	2
45093	0	0	1	0	Marrupe	147	4.99043	0.482993	0.0272109	0.210884	0.244898	0	0	0	1	0	0	4	6	0	0.285714	0.428571	0	0	0	0	2
45094	17685.4	9.78049	0	0	Mascaraque	414	6.02587	0.487923	0.0531401	0.270531	0.164251	0	1	0	1	0.661778	0	6	10	0	0.222222	0.37037	0	4	0	0.25	4
45095	37008	10.5189	0	0	Mata (La)	854	6.74993	0.512881	0.0679157	0.298595	0.14637	1	1	0	1	0.226102	4	16	25	0.0606061	0.242424	0.378788	4	4	0.307692	0.307692	5
45096	39338.2	10.58	1	0.00627562	Mazarambroz	1259	7.13807	0.482129	0.0540111	0.317712	0.110405	0	1	0	1	0.546712	4	16	33	0.0444444	0.177778	0.366667	4	4	0.222222	0.222222	4
45097	44233	10.6972	1	0.966821	Mejorada	1354	7.21082	0.485229	0.0635155	0.281388	0.140325	0	0	0	1	0.889106	8	28	55	0.057554	0.201439	0.395683	0	4	0	1	6
45098	37540.2	10.5332	1	0	Menasalbas	2513	7.82923	0.479109	0.0509351	0.277756	0.150418	0	1	0	1	0.801609	8	41	60	0.0506329	0.259494	0.379747	4	6	0.2	0.3	2
45099	38269.2	10.5524	0	0.391362	Méntrida	5722	8.65207	0.487417	0.0900035	0.336071	0.0613422	0	1	0	1	0.351985	6	131	191	0.0126582	0.276371	0.402954	4	9	0.173913	0.391304	5
45100	12611.4	9.44235	0	0.00296656	Mesegar de Tajo	203	5.31321	0.463054	0.0394089	0.236453	0.187192	0	0	0	1	0.87	0	4	6	0	0.307692	0.461538	0	0	0	0	5
45101	23934.1	10.0831	1	0.999499	Miguel Esteban	4791	8.47449	0.498017	0.0573993	0.325402	0.115216	0	1	1	1	0.424771	13	74	126	0.0375723	0.213873	0.364162	12	32	0.130435	0.347826	4
45102	0	0	0	0.880326	Mocejón	5004	8.51799	0.5002	0.0879297	0.323741	0.0885292	1	1	0	1	0	9	94	130	0.025641	0.267806	0.37037	5	11	0.15625	0.34375	6
45103	0	0	0	0	Mohedas de la Jara	389	5.96358	0.462725	0.0385604	0.226221	0.197943	0	0	0	1	0	4	5	7	0.173913	0.217391	0.304348	0	4	0	1	1
45104	85361.2	11.3546	0	0	Montearagón	533	6.27852	0.467167	0.0600375	0.27955	0.12758	0	0	0	0	0.44426	4	9	21	0.08	0.18	0.42	0	9	0	0.75	5
45105	0	0	1	0	Montesclaros	384	5.95064	0.486979	0.0182292	0.236979	0.231771	0	0	0	0	0	0	5	9	0	0.2	0.36	0	4	0	1	2
45106	69993.4	11.1562	0	0.773456	Mora	9796	9.18973	0.497652	0.0737036	0.303287	0.120661	0	1	0	1	0.426869	29	175	246	0.0452418	0.273011	0.383775	15	36	0.0519031	0.124567	4
45107	49789.7	10.8156	0	0.329317	Nambroca	5020	8.52119	0.490837	0.100996	0.32251	0.0673307	0	1	0	1	0.61941	10	74	102	0.0343643	0.254296	0.350515	10	21	0.120482	0.253012	6
45108	0	0	1	0	Nava de Ricomalillo (La)	493	6.20051	0.46856	0.0263692	0.263692	0.178499	0	1	0	1	0	4	4	15	0.105263	0.105263	0.394737	0	4	0	0.25	1
45109	290879	12.5807	1	0.95333	Navahermosa	3586	8.18479	0.476018	0.054657	0.287786	0.133575	0	1	1	1	0.367487	7	64	119	0.0243902	0.222997	0.414634	6	6	0.122449	0.122449	2
45110	77528.3	11.2584	1	0.978493	Navalcán	1888	7.54327	0.477225	0.0407839	0.25053	0.185911	0	1	0	1	0.556205	4	40	79	0.0192308	0.192308	0.379808	0	11	0	0.52381	3
45111	0	0	1	0	Navalmoralejo	51	3.93183	0.490196	0	0.0980392	0.392157	0	0	0	1	0	0	0	4	0	0	1	4	4	1	1	1
45112	27693.6	10.229	1	0.981703	Navalmorales (Los)	2163	7.67925	0.483588	0.0471567	0.284327	0.152104	0	1	0	1	0.598437	9	61	79	0.0436893	0.296117	0.383495	14	9	0.150538	0.0967742	1
45113	213181	12.2699	1	0	Navalucillos (Los)	1987	7.59438	0.493206	0.0377453	0.262204	0.193256	0	1	0	1	0.307682	7	26	70	0.0454545	0.168831	0.454545	4	8	0.121212	0.242424	1
45114	0	0	1	0	Navamorcuende	595	6.38856	0.502521	0.0386555	0.247059	0.216807	1	0	0	1	0	0	13	18	0	0.216667	0.3	4	14	0.2	0.7	2
45115	161244	11.9907	1	0.938538	Noblejas	3857	8.25764	0.500389	0.092559	0.308011	0.0998185	1	1	0	1	0.354366	9	60	77	0.0436893	0.291262	0.373786	6	111	0.0267857	0.495536	5
45116	26547.2	10.1867	1	0.0154465	Noez	942	6.84801	0.503185	0.0721868	0.316348	0.11465	1	1	0	1	0.855999	4	13	26	0.0625	0.203125	0.40625	0	0	0	0	4
45117	24336.7	10.0997	1	8.71723e-05	Nombela	881	6.78106	0.464245	0.0544835	0.300795	0.108967	0	1	0	1	0.368687	5	21	30	0.0595238	0.25	0.357143	4	4	1	1	2
45118	36502.8	10.5051	0	0.0277105	Novés	3236	8.08209	0.482695	0.0822002	0.318603	0.0818912	0	1	0	1	0.246786	7	78	106	0.0250896	0.27957	0.379928	0	24	0	0.648649	5
45119	0	0	0	0.785028	Numancia de la Sagra	5287	8.57301	0.479289	0.0767921	0.341782	0.060715	0	1	0	1	0	18	108	158	0.0439024	0.263415	0.385366	5	9	0.131579	0.236842	5
45120	71927.3	11.1834	1	0	Nuño Gómez	145	4.97673	0.441379	0.0413793	0.227586	0.172414	0	0	0	1	0.62101	4	4	5	0.266667	0.266667	0.333333	0	4	0	1	2
45121	327628	12.6996	1	0.165569	Ocaña	13185	9.48684	0.499431	0.0964733	0.336974	0.0659841	0	1	0	1	0.303882	30	310	326	0.0280112	0.289449	0.304388	24	38	0.176471	0.279412	5
45122	0	0	0	0.337373	Olías del Rey	8469	9.04417	0.493801	0.0876136	0.339001	0.0671862	0	1	1	1	0	12	125	130	0.0289157	0.301205	0.313253	12	32	0.0909091	0.242424	6
45123	68808	11.1391	1	1	Ontígola	4752	8.46632	0.468224	0.086069	0.344697	0.0374579	0	1	0	1	0.351055	6	58	102	0.0233463	0.225681	0.396887	64	135	0.160401	0.338346	5
45124	0	0	1	0	Orgaz	2584	7.85709	0.497678	0.0704334	0.304567	0.122678	0	1	0	1	0	7	39	46	0.0522388	0.291045	0.343284	4	16	0.0526316	0.210526	4
45125	53623	10.8897	1	0.0135165	Oropesa	2607	7.86596	0.520522	0.0479478	0.328347	0.144227	1	1	0	1	0.677273	4	39	67	0.021978	0.214286	0.368132	4	21	0.0754717	0.396226	3
45126	10277.7	9.23773	0	0.00269167	Otero	357	5.87774	0.467787	0.0448179	0.288515	0.134454	0	0	0	1	0.852805	4	9	9	0.097561	0.219512	0.219512	4	4	1	1	5
45127	77259.6	11.2549	0	0.568605	Palomeque	1126	7.02643	0.456483	0.0612789	0.321492	0.0737123	0	1	0	1	0.192301	4	32	25	0.047619	0.380952	0.297619	4	0	1	0	5
45128	0	0	0	0.870541	Pantoja	3506	8.16223	0.501997	0.0798631	0.330861	0.0912721	1	1	0	1	0	9	70	80	0.0362903	0.282258	0.322581	6	4	0.315789	0.210526	5
45129	12553.2	9.43773	1	0.895899	Paredes de Escalona	122	4.80402	0.459016	0.0163934	0.172131	0.270492	0	0	0	0	0.9	0	0	4	0	0	1	0	0	0	0	2
45130	39625.2	10.5872	1	0.890485	Parrillas	337	5.82008	0.47181	0.0356083	0.225519	0.210682	0	1	0	0	0.695946	0	4	9	0	0.133333	0.3	0	0	0	0	3
45131	15855.1	9.67125	1	0	Pelahustán	342	5.83481	0.426901	0.0292398	0.230994	0.166667	0	0	0	1	0.250083	0	6	9	0	0.181818	0.272727	0	4	0	1	2
45132	74024.2	11.2121	0	0.357486	Pepino	3003	8.00737	0.487845	0.0739261	0.334998	0.0789211	0	0	0	1	0.441464	4	36	80	0.021978	0.197802	0.43956	10	14	0.25	0.35	6
45133	0	0	1	0.578591	Polán	3870	8.26101	0.50155	0.0751938	0.325065	0.101292	1	1	0	1	0	9	60	95	0.0367347	0.244898	0.387755	4	27	0.08	0.54	4
45134	46588.2	10.7491	0	0.495742	Portillo de Toledo	2234	7.71155	0.493286	0.0693823	0.314682	0.109221	0	1	0	1	0.336974	4	45	55	0.0236686	0.266272	0.325444	5	60	0.0406504	0.487805	5
45135	124357	11.7309	1	0.928101	Puebla de Almoradiel (La)	4953	8.50775	0.490612	0.047446	0.307692	0.135473	0	1	0	1	0.355975	17	70	129	0.0492754	0.202899	0.373913	7	58	0.0813953	0.674419	4
45136	38608	10.5612	1	0.00043815	Puebla de Montalbán (La)	7838	8.96674	0.495024	0.0688951	0.32049	0.105639	0	1	0	1	0.517932	24	141	253	0.0384615	0.225962	0.405449	13	12	0.213115	0.196721	5
45137	90035.3	11.408	1	0.000520119	Pueblanueva (La)	2166	7.68064	0.489381	0.0738689	0.306094	0.109418	0	1	0	1	0.784909	8	53	79	0.0372093	0.246512	0.367442	7	0	0.411765	0	5
45138	0	0	0	0	Puente del Arzobispo (El)	1153	7.05012	0.502168	0.0494363	0.287944	0.164788	1	0	0	1	0	4	24	39	0.0416667	0.25	0.40625	4	4	0.8	0.8	3
45139	0	0	1	0	Puerto de San Vicente	140	4.94164	0.45	0.0214286	0.15	0.278571	0	0	0	0	0	4	4	5	0.333333	0.333333	0.416667	0	0	0	0	1
45140	29368.6	10.2877	1	0	Pulgar	1491	7.3072	0.488934	0.0710932	0.303823	0.114017	0	1	0	1	0.897836	4	25	35	0.043956	0.274725	0.384615	4	5	0.25	0.3125	4
45141	119170	11.6883	1	0	Quero	985	6.89264	0.485279	0.0477157	0.269036	0.168528	0	1	0	1	0.467993	4	19	40	0.036036	0.171171	0.36036	4	4	0.363636	0.363636	4
45142	170553	12.0468	0	0.835324	Quintanar de la Orden	11069	9.3119	0.503388	0.0769717	0.330653	0.0957629	1	1	0	1	0.302161	32	205	367	0.0361991	0.2319	0.415158	31	87	0.141553	0.39726	4
45143	40646.7	10.6127	0	0.977977	Quismondo	1673	7.42237	0.501494	0.0747161	0.318589	0.108189	1	1	0	1	0.157571	4	33	48	0.0298507	0.246269	0.358209	0	4	0	1	5
45144	410587	12.9253	1	0	Real de San Vicente (El)	973	6.88038	0.461459	0.045221	0.245632	0.170606	0	0	0	1	0.361862	4	14	29	0.0421053	0.147368	0.305263	4	6	0.444444	0.666667	2
45145	0	0	0	0.999354	Recas	4552	8.42332	0.451011	0.0751318	0.308436	0.0674429	0	1	0	1	0	15	105	120	0.0407609	0.285326	0.326087	4	7	0.16	0.28	5
45146	0	0	0	0	Retamoso de la Jara	97	4.57471	0.443299	0.0103093	0.185567	0.247423	0	0	0	1	0	0	4	4	0	0.4	0.4	0	4	0	1	1
45147	14925.4	9.61082	0	0	Rielves	760	6.63332	0.494737	0.0684211	0.335526	0.0907895	0	1	0	1	0.9	5	21	27	0.0684932	0.287671	0.369863	4	4	0.333333	0.333333	5
45148	0	0	1	0	Robledo del Mazo	249	5.51745	0.465863	0.0120482	0.220884	0.232932	0	0	0	1	0	0	4	9	0	0.153846	0.346154	0	6	0	1	1
45149	82416.4	11.3195	1	0	Romeral (El)	555	6.31897	0.506306	0.0324324	0.29009	0.183784	1	1	0	0	0.703053	0	6	13	0	0.181818	0.393939	0	4	0	0.666667	3
45150	24439.7	10.104	1	0	San Bartolomé de las Abiertas	533	6.27852	0.467167	0.0600375	0.26454	0.142589	0	0	0	1	0.899588	4	23	15	0.0701754	0.403509	0.263158	0	4	0	0.8	1
45151	26999.1	10.2036	1	0	San Martín de Montalbán	699	6.54965	0.494993	0.0500715	0.271817	0.173104	0	1	0	1	0.9	4	20	14	0.0701754	0.350877	0.245614	4	4	0.363636	0.363636	2
45152	0	0	0	0.00789394	San Martín de Pusa	585	6.37161	0.461538	0.0205128	0.259829	0.181197	0	0	0	1	0	0	11	18	0	0.211538	0.346154	0	9	0	0.6	1
45153	33878.7	10.4305	1	0	San Pablo de los Montes	1696	7.43603	0.494693	0.0501179	0.287146	0.157429	0	1	0	1	0.9	4	36	58	0.0310078	0.27907	0.449612	4	0	0.333333	0	2
45154	0	0	1	0.965748	San Román de los Montes	2047	7.62413	0.486077	0.0791402	0.317049	0.0898876	0	1	0	1	0	4	34	58	0.0261438	0.222222	0.379085	0	0	0	0	6
45155	21860.8	9.99245	1	0	Santa Ana de Pusa	358	5.88053	0.430168	0.0195531	0.22067	0.189944	0	1	0	1	0.487551	4	7	10	0.125	0.21875	0.3125	4	0	0.307692	0	1
45156	329967	12.7067	1	0.555717	Santa Cruz de la Zarza	4097	8.31801	0.492556	0.0580913	0.30266	0.131804	0	1	1	1	0.365109	4	48	95	0.0182648	0.219178	0.43379	6	34	0.0517241	0.293103	3
45157	107636	11.5865	1	0.550406	Santa Cruz del Retamar	3682	8.21121	0.480989	0.0695274	0.320478	0.0909832	0	1	0	1	0.212986	14	54	102	0.04947	0.190813	0.360424	5	7	0.172414	0.241379	5
45158	53373.7	10.8851	0	0.781275	Santa Olalla	3387	8.1277	0.493652	0.0664305	0.319752	0.10747	0	1	0	1	0.246411	11	66	109	0.0351438	0.210863	0.348243	5	4	0.25	0.2	5
45159	0	0	0	0	Sartajada	107	4.67283	0.383178	0.046729	0.186916	0.149533	0	0	0	1	0	4	4	4	0.444444	0.444444	0.444444	0	0	0	0	2
45160	44999.6	10.7144	1	0.997203	Segurilla	1366	7.21964	0.491947	0.0768668	0.299414	0.115666	0	0	0	1	0.889989	4	31	47	0.034188	0.264957	0.401709	0	8	0	0.727273	6
45161	0	0	1	0.939746	Seseña	28102	10.2436	0.486478	0.106434	0.341969	0.0380756	0	1	0	1	0	40	459	515	0.0256082	0.293854	0.329706	38	136	0.0911271	0.326139	6
45162	0	0	1	0	Sevilleja de la Jara	643	6.46614	0.438569	0.00933126	0.192846	0.236392	0	0	0	1	0	0	5	6	0	0.2	0.24	0	4	0	0.16	1
45163	0	0	1	0	Sonseca	11084	9.31326	0.494406	0.0772284	0.312883	0.104294	0	1	0	1	0	29	150	292	0.0398352	0.206044	0.401099	15	32	0.136364	0.290909	4
45164	0	0	1	0	Sotillo de las Palomas	183	5.20949	0.491803	0.0218579	0.224044	0.245902	0	0	0	1	0	4	4	7	0.181818	0.181818	0.318182	0	0	0	0	2
45165	31078	10.3443	1	0.903243	Talavera de la Reina	83247	11.3296	0.520283	0.0709455	0.335472	0.113866	1	1	0	1	0.810605	398	1899	3381	0.0444395	0.212037	0.377512	169	434	0.140599	0.361065	7
45166	0	0	0	0	Tembleque	1949	7.57507	0.491021	0.0482299	0.300154	0.142637	0	1	0	1	0	0	19	62	0	0.150794	0.492063	9	14	0.204545	0.318182	3
45167	435563	12.9844	0	0.00147047	Toboso (El)	1663	7.41638	0.500902	0.0396873	0.294047	0.167168	1	1	0	1	0.38249	4	22	38	0.040404	0.222222	0.383838	6	5	0.24	0.2	4
45168	0	0	0	0.985987	Toledo	85085	11.3514	0.523958	0.0754069	0.344444	0.104108	1	1	0	1	0	116	1017	1296	0.0291604	0.255656	0.325792	426	1237	0.12874	0.373829	7
45169	45900	10.7342	1	0.00040162	Torralba de Oropesa	193	5.26269	0.466321	0.0207254	0.284974	0.160622	0	0	0	0	0.9	0	7	10	0	0.318182	0.454545	0	4	0	1	3
45170	34704.9	10.4546	1	0	Torrecilla de la Jara	208	5.33754	0.447115	0.0144231	0.211538	0.221154	0	0	0	1	0.831914	0	4	7	0	0.173913	0.304348	0	4	0	1	1
45171	25596	10.1502	0	0.940093	Torre de Esteban Hambrán (La)	1703	7.44015	0.499119	0.0551967	0.309454	0.134469	0	1	0	1	0.395589	4	13	50	0.0353982	0.115044	0.442478	0	6	0	0.5	5
45172	119506	11.6911	1	0.999617	Torrico	691	6.53814	0.489146	0.0376266	0.244573	0.206946	0	0	0	1	0.502685	4	10	16	0.0833333	0.208333	0.333333	4	40	0.0606061	0.606061	3
45173	879864	13.6875	0	0.890042	Torrijos	13678	9.52354	0.510747	0.0826875	0.335795	0.092265	1	1	0	1	0.49706	38	270	392	0.0348944	0.247934	0.359963	27	73	0.140625	0.380208	5
45174	22694.6	10.0299	1	0	Totanés	358	5.88053	0.49162	0.0446927	0.321229	0.125698	0	1	0	1	0.877933	4	6	6	0.190476	0.285714	0.285714	0	4	0	0.153846	4
45175	0	0	0	0	Turleque	721	6.58064	0.489598	0.0540915	0.256588	0.178918	0	0	0	0	0	4	10	15	0.111111	0.277778	0.416667	0	4	0	0.444444	3
45176	28658.1	10.2632	0	0.958856	Ugena	5615	8.6332	0.485663	0.0774711	0.359751	0.0484417	0	1	1	1	0.779199	18	85	155	0.0469974	0.221932	0.4047	17	4	0.447368	0.105263	6
45177	50333.2	10.8264	1	0	Urda	2417	7.79028	0.501034	0.0562681	0.300786	0.14398	1	1	0	1	0.574743	7	46	81	0.0374332	0.245989	0.433155	4	8	0.173913	0.347826	2
45179	287708	12.5697	1	0.000167848	Valdeverdeja	550	6.30992	0.496364	0.0327273	0.263636	0.2	0	0	0	1	0.44971	0	5	12	0	0.192308	0.461538	4	0	1	0	3
45180	0	0	0	0.994045	Valmojado	4503	8.4125	0.493893	0.0963802	0.315567	0.0819454	0	1	0	1	0	7	60	78	0.030837	0.264317	0.343612	6	17	0.15	0.425	5
45181	9309.96	9.13884	1	0.00654173	Velada	2865	7.96032	0.484468	0.0722513	0.302967	0.10925	0	1	0	1	0.388456	15	67	128	0.047619	0.212698	0.406349	10	4	0.714286	0.285714	3
45182	75921.1	11.2374	1	0	Ventas con Peña Aguilera (Las)	1109	7.01121	0.500451	0.0522994	0.297565	0.150586	1	1	0	0	0.477171	4	25	34	0.047619	0.297619	0.404762	4	0	0.8	0	2
45183	23837	10.079	0	0.978896	Ventas de Retamosa (Las)	3806	8.24433	0.468996	0.0832895	0.332633	0.0530741	0	1	0	1	0.328565	6	77	98	0.0232558	0.29845	0.379845	4	12	0.0666667	0.2	5
45184	43892.5	10.6895	1	0	Ventas de San Julián (Las)	222	5.40268	0.531532	0.0045045	0.337838	0.189189	1	0	0	1	0.9	4	7	13	0.142857	0.25	0.464286	4	4	0.444444	0.444444	3
45185	193654	12.1738	1	0	Villacañas	9418	9.15038	0.500425	0.0615842	0.328307	0.110533	1	1	0	1	0.353109	30	229	448	0.030303	0.231313	0.452525	10	35	0.0970874	0.339806	4
45186	95835.3	11.4704	1	0	Villa de Don Fadrique (La)	3572	8.18088	0.503639	0.0573908	0.31187	0.134378	1	1	1	1	0	17	46	123	0.0594406	0.160839	0.43007	4	15	0.097561	0.365854	4
45187	297255	12.6023	1	0	Villafranca de los Caballeros	4884	8.49372	0.498362	0.0497543	0.308968	0.13964	0	1	1	1	0.306704	14	92	175	0.0358056	0.235294	0.44757	11	23	0.171875	0.359375	4
45188	0	0	0	0.846764	Villaluenga de la Sagra	4081	8.3141	0.498897	0.0913992	0.315119	0.0923793	0	1	0	1	0	10	80	109	0.0323625	0.2589	0.352751	5	14	0.116279	0.325581	5
45189	15401	9.64219	0	0.0163486	Villamiel de Toledo	1021	6.92854	0.489716	0.08619	0.32811	0.0754163	0	1	0	1	0.754251	4	20	32	0.0481928	0.240964	0.385542	0	4	0	0.8	5
45190	24600.9	10.1105	0	0.00645889	Villaminaya	508	6.23048	0.496063	0.0590551	0.269685	0.167323	0	1	0	1	0.89768	4	8	19	0.105263	0.210526	0.5	0	4	0	0.8	4
45191	31532.8	10.3588	0	0	Villamuelas	610	6.41346	0.478689	0.0459016	0.278689	0.154098	0	1	0	1	0.807651	4	6	20	0.097561	0.146341	0.487805	4	8	0.0344828	0.0689655	5
45192	114331	11.6469	0	0.999396	Villanueva de Alcardete	3062	8.02682	0.483671	0.0483344	0.299151	0.136185	0	1	0	0	0.292331	4	35	70	0.0263158	0.230263	0.460526	12	4	0.375	0.125	4
45193	51475.8	10.8489	0	0	Villanueva de Bogas	699	6.54965	0.482117	0.0386266	0.283262	0.160229	0	1	0	1	0.378382	4	10	14	0.114286	0.285714	0.4	4	5	0.142857	0.178571	4
45194	20470.4	9.92674	1	0	Villarejo de Montalbán	75	4.31749	0.466667	0.04	0.213333	0.213333	0	0	0	0	0.890677	4	4	4	0.666667	0.666667	0.666667	0	4	0	0.0833333	1
45195	275001	12.5245	1	0.292565	Villarrubia de Santiago	2509	7.82764	0.497011	0.0554006	0.298924	0.142686	0	1	0	1	0.329123	7	30	38	0.0522388	0.223881	0.283582	4	9	0.117647	0.264706	3
45196	0	0	0	0.584431	Villaseca de la Sagra	1864	7.53048	0.497854	0.0718884	0.325107	0.100858	0	1	0	1	0	4	46	59	0.0261438	0.300654	0.385621	4	9	0.108108	0.243243	5
45197	57469.1	10.959	1	0.632921	Villasequilla	2563	7.84893	0.486539	0.0647679	0.310183	0.111588	0	1	0	1	0.876641	6	46	64	0.0324324	0.248649	0.345946	4	4	0.166667	0.166667	5
45198	337725	12.73	1	0.14554	Villatobas	2595	7.86134	0.485164	0.0631985	0.29711	0.124855	0	1	0	1	0.324586	4	33	61	0.0240964	0.198795	0.36747	4	10	0.235294	0.588235	3
45199	25761.2	10.1566	0	0.791501	Viso de San Juan (El)	5533	8.61849	0.467739	0.0983192	0.326947	0.0424724	0	1	0	1	0.84	12	122	141	0.0265487	0.269912	0.311947	4	7	0.266667	0.466667	5
45200	476563	13.0744	1	0	Yébenes (Los)	5752	8.6573	0.488352	0.0676287	0.31589	0.104833	0	1	0	1	0.601227	7	94	122	0.0225806	0.303226	0.393548	5	40	0.0238095	0.190476	2
45201	0	0	0	0.000495176	Yeles	5868	8.67727	0.473415	0.0896387	0.321575	0.0622018	0	1	1	1	0	17	150	143	0.0345528	0.304878	0.29065	9	13	0.15	0.216667	6
45202	94352.5	11.4548	0	0.749887	Yepes	5268	8.56941	0.492217	0.0778284	0.309605	0.104784	0	1	0	1	0.504818	6	100	138	0.0168067	0.280112	0.386555	4	16	0.0645161	0.258065	5
45203	0	0	0	0.670168	Yuncler	4582	8.42989	0.483195	0.0896988	0.327368	0.0661283	0	1	0	1	0	6	112	107	0.017094	0.319088	0.304843	4	5	0.190476	0.238095	5
45204	0	0	0	8.72732e-05	Yunclillos	806	6.69208	0.476427	0.0583127	0.306452	0.111663	0	1	0	0	0	0	7	20	0	0.14	0.4	4	4	0.5	0.5	5
45205	0	0	0	0.516697	Yuncos	10630	9.27144	0.490499	0.0915334	0.341016	0.0579492	0	1	1	1	0	29	246	309	0.0311159	0.263948	0.331545	20	54	0.15748	0.425197	6
45901	64175.9	11.0694	0	0.00329291	Santo Domingo-Caudilla	1111	7.01302	0.475248	0.0576058	0.306931	0.110711	0	1	0	1	0.153011	4	27	34	0.0363636	0.245455	0.309091	4	0	0.266667	0	5
